# Supplementary material
Source: Hindawi journal article supplement (doi:10.1155/2011/358717)
Supplement: f1 [file 358717.f1.pdf]

supplementary Table 1. The differentially expressed genes in F3-treated THP-1 cells after 6 hours.

| Gene Symbol | Chip ID     | Fold Change | Genbank   | UniGene   | Description                                                                           |
|-------------|-------------|-------------|-----------|-----------|---------------------------------------------------------------------------------------|
| CCL20       | 205476_at   | 421.7       | NM_004591 | Hs.75498  | chemokine (C-C motif) ligand 20                                                       |
| CCL4        | 204103_at   | 351.6       | NM_002984 | Hs.75703  | chemokine (C-C motif) ligand 4                                                        |
| BCL2A1      | 205681_at   | 228.6       | NM_004049 | Hs.227817 | BCL2-related protein A1                                                               |
| ISG20       | 204698_at   | 202.1       | NM_002201 | Hs.459265 | interferon stimulated exonuclease gene 20kDa                                          |
| CCL8        | 214038_at   | 139.1       | AI984980  | Hs.271387 | chemokine (C-C motif) ligand 8                                                        |
| CXCL1       | 204470_at   | 115.1       | NM_001511 | Hs.789    | chemokine (C-X-C motif) ligand 1 (melanoma growth stimulating activity, alpha)        |
| IL7R        | 205798_at   | 111.6       | NM_002185 | Hs.362807 | interleukin 7 receptor ; interleukin 7 receptor                                       |
| BCL3        | 204908_s_at | 104.2       | NM_005178 | Hs.31210  | B-cell CLL/lymphoma 3                                                                 |
| GBP1        | 202269_x_at | 99.99       | BC002666  | Hs.62661  | guanylate binding protein 1, interferon-inducible, 67kDa                              |
| SLAMF7      | 219159_s_at | 98.3        | NM_021181 | Hs.517265 | SLAM family member 7                                                                  |
| CXCL10      | 204533_at   | 93.05       | NM_001565 | Hs.413924 | chemokine (C-X-C motif) ligand 10                                                     |
| IL8         | 211506_s_at | 91.31       | AF043337  | Hs.624    | interleukin 8                                                                         |
| IL8         | 202859_x_at | 85.26       | NM_000584 | Hs.624    | interleukin 8                                                                         |
| THBS1       | 201110_s_at | 84.5        | NM_003246 | Hs.164226 | thrombospondin 1                                                                      |
| EBI3        | 219424_at   | 82.87       | NM_005755 | Hs.501452 | Epstein-Barr virus induced gene 3                                                     |
| SAT         | 213988_s_at | 76.47       | BE971383  | Hs.28491  | spermidine/spermine N1-acetyltransferase                                              |
| USP18       | 219211_at   | 76.22       | NM_017414 | Hs.38260  | ubiquitin specific peptidase 18                                                       |
| LAMP3       | 205569_at   | 75.89       | NM_014398 | Hs.518448 | lysosomal-associated membrane protein 3                                               |
| CCL2        | 216598_s_at | 71.33       | S69738    | Hs.303649 | chemokine (C-C motif) ligand 2                                                        |
| IL1B        | 205067_at   | 65.51       | NM_000576 | Hs.126256 | interleukin 1, beta                                                                   |
| IL1B        | 39402_at    | 64.08       | M15330    | Hs.126256 | interleukin 1, beta                                                                   |
| CXCL13      | 205242_at   | 61.28       | NM_006419 | Hs.100431 | chemokine (C-X-C motif) ligand 13 (B-cell chemoattractant)                            |
| CXCL11      | 211122_s_at | 59.72       | AF002985  | Hs.518814 | chemokine (C-X-C motif) ligand 11                                                     |
| TNFAIP6     | 206025_s_at | 57.53       | AW188198  | Hs.437322 | tumor necrosis factor, alpha-induced protein 6                                        |
| IGFBP5      | 211959_at   | 56.92       | AW007532  | Hs.369982 | insulin-like growth factor binding protein 5                                          |
| CXCL3       | 207850_at   | 55.61       | NM_002090 | Hs.89690  | chemokine (C-X-C motif) ligand 3                                                      |
| TNFAIP6     | 206026_s_at | 51.77       | NM_007115 | Hs.437322 | tumor necrosis factor, alpha-induced protein 6                                        |
| THBS1       | 201109_s_at | 46.24       | AV726673  | Hs.164226 | thrombospondin 1                                                                      |
| CCL3        | 205114_s_at | 44.61       | NM_002983 | Hs.514107 | chemokine (C-C motif) ligand 3 ; chemokine (C-C motif) ligand 3-like 1                |
| GPR132      | 221140_s_at | 40.77       | NM_013345 | Hs.532504 | G protein-coupled receptor 132                                                        |
| DUSP6       | 208893_s_at | 40.29       | BC005047  | Hs.298654 | dual specificity phosphatase 6                                                        |
| CALCRL      | 210815_s_at | 40.19       | U17473    | Hs.470882 | calcitonin receptor-like                                                              |
| IGFBP3      | 210095_s_at | 39.14       | M31159    | Hs.450230 | insulin-like growth factor binding protein 3                                          |
| SOD2        | 215223_s_at | 38.22       | W46388    | Hs.487046 | superoxide dismutase 2, mitochondrial                                                 |
| IL23A       | 220054_at   | 37.77       | NM_016584 | Hs.98309  | interleukin 23, alpha subunit p19                                                     |
| PTGS2       | 204748_at   | 37.69       | NM_000963 | Hs.196384 | prostaglandin-endoperoxide synthase 2 (prostaglandin G/H synthase and cyclooxygenase) |

|          |             |       |           |           |                                                                                                           |
|----------|-------------|-------|-----------|-----------|-----------------------------------------------------------------------------------------------------------|
| IL12B    | 207901_at   | 37.1  | NM_002187 | Hs.674    | interleukin 12B (natural killer cell stimulatory factor 2, cytotoxic lymphocyte maturation factor 2, p40) |
| FCAR     | 211307_s_at | 34.64 | U43677    | Hs.193122 | Fc fragment of IgA, receptor for                                                                          |
| IFIT1    | 203153_at   | 34.37 | NM_001548 | Hs.20315  | interferon-induced protein with tetratricopeptide repeats 1                                               |
| HESX1    | 211267_at   | 31.14 | U82811    | Hs.171980 | homeo box (expressed in ES cells) 1                                                                       |
| LRRRC50  | 222068_s_at | 29.96 | AW663632  | Hs.310164 | leucine rich repeat containing 50                                                                         |
| IFIT5    | 203596_s_at | 29.41 | NM_012420 | Hs.252839 | interferon-induced protein with tetratricopeptide repeats 5                                               |
| IGFBP3   | 212143_s_at | 28.33 | BF340228  | Hs.450230 | insulin-like growth factor binding protein 3                                                              |
| CXCL2    | 209774_x_at | 28.14 | M57731    | Hs.75765  | chemokine (C-X-C motif) ligand 2                                                                          |
| TNF      | 207113_s_at | 27.69 | NM_000594 | Hs.241570 | tumor necrosis factor (TNF superfamily, member 2)                                                         |
| IL15RA   | 207375_s_at | 27.67 | NM_002189 | Hs.524117 | interleukin 15 receptor, alpha                                                                            |
| CXCL11   | 210163_at   | 25.9  | AF030514  | Hs.518814 | chemokine (C-X-C motif) ligand 11                                                                         |
| KITLG    | 211124_s_at | 25.64 | AF119835  | Hs.1048   | KIT ligand                                                                                                |
| ISG20    | 33304_at    | 25.61 | U88964    | Hs.459265 | interferon stimulated exonuclease gene 20kDa                                                              |
| MAFB     | 218559_s_at | 25.46 | NM_005461 | Hs.169487 | v-maf musculoaponeurotic fibrosarcoma oncogene homolog B (avian)                                          |
| CCL7     | 208075_s_at | 24.26 | NM_006273 | Hs.251526 | chemokine (C-C motif) ligand 7 ; chemokine (C-C motif) ligand 7                                           |
| SLAMF8   | 219386_s_at | 23.8  | NM_020125 | Hs.438683 | SLAM family member 8                                                                                      |
| SLC2A6   | 220091_at   | 23.03 | NM_017585 | Hs.244378 | solute carrier family 2 (facilitated glucose transporter), member 6                                       |
| GCH1     | 204224_s_at | 22.89 | NM_000161 | Hs.86724  | GTP cyclohydrolase 1 (dopa-responsive dystonia)                                                           |
| FEZ1     | 203562_at   | 22.65 | NM_005103 | Hs.224008 | fasciculation and elongation protein zeta 1 (zygin I)                                                     |
| NFKB2    | 209636_at   | 22.44 | BC002844  | Hs.73090  | nuclear factor of kappa light polypeptide gene enhancer in B-cells 2 (p49/p100)                           |
| CXCL6    | 206336_at   | 22.12 | NM_002993 | Hs.164021 | chemokine (C-X-C motif) ligand 6 (granulocyte chemotactic protein 2)                                      |
| ICAM1    | 202638_s_at | 21.72 | NM_000201 | Hs.515126 | intercellular adhesion molecule 1 (CD54), human rhinovirus receptor                                       |
| MSC      | 209928_s_at | 21.44 | AF060154  | Hs.442619 | musculin (activated B-cell factor-1)                                                                      |
| APOBEC3A | 210873_x_at | 21.13 | U03891    | Hs.348983 | apolipoprotein B mRNA editing enzyme, catalytic polypeptide-like 3A                                       |
| SOD2     | 216841_s_at | 21.03 | X15132    | Hs.487046 | superoxide dismutase 2, mitochondrial                                                                     |
| CALCRL   | 206331_at   | 20.96 | NM_005795 | Hs.470882 | calcitonin receptor-like                                                                                  |
| STX11    | 210190_at   | 20.57 | AF071504  | Hs.118958 | syntaxin 11                                                                                               |
| HERC6    | 219352_at   | 19.79 | NM_017912 | Hs.529317 | hect domain and RLD 6                                                                                     |
| IL1RN    | 212657_s_at | 19.4  | U65590    | Hs.81134  | interleukin 1 receptor antagonist                                                                         |
| MX1      | 202086_at   | 19.26 | NM_002462 | Hs.517307 | myxovirus (influenza virus) resistance 1, interferon-inducible protein p78 (mouse)                        |
| PML      | 211012_s_at | 18.98 | BC000080  | Hs.534573 | promyelocytic leukemia ; hypothetical protein LOC161527                                                   |
| MGC5618  | 221477_s_at | 18.92 | BF575213  |           | hypothetical protein MGC5618                                                                              |
| IFI44L   | 204439_at   | 18.56 | NM_006820 | Hs.389724 | interferon-induced protein 44-like                                                                        |
| CD83     | 204440_at   | 18.36 | NM_004233 | Hs.484703 | CD83 antigen (activated B lymphocytes, immunoglobulin superfamily)                                        |
| IL6      | 205207_at   | 17.81 | NM_000600 | Hs.512234 | interleukin 6 (interferon, beta 2)                                                                        |
| CD40     | 205153_s_at | 17.68 | NM_001250 | Hs.472860 | CD40 antigen (TNF receptor superfamily member 5)                                                          |
| BIRC3    | 210538_s_at | 17.58 | U37546    | Hs.127799 | baculoviral IAP repeat-containing 3                                                                       |
| IFIT5    | 203595_s_at | 16.78 | N47725    | Hs.252839 | interferon-induced protein with tetratricopeptide repeats 5                                               |
| SERPINE2 | 212190_at   | 16.45 | AL541302  | Hs.38449  | serpin peptidase inhibitor, clade E (nexin, plasminogen activator inhibitor type 1), member 2             |

|          |             |       |           |           |                                                                                           |
|----------|-------------|-------|-----------|-----------|-------------------------------------------------------------------------------------------|
| STAT4    | 206118_at   | 16.25 | NM_003151 | Hs.80642  | signal transducer and activator of transcription 4                                        |
| SN       | 219519_s_at | 16.08 | NM_023068 | Hs.31869  | Sialoadhesin ; Sialoadhesin                                                               |
| IFIT3    | 204747_at   | 16.03 | NM_001549 | Hs.47338  | interferon-induced protein with tetratricopeptide repeats 3                               |
| CRIM1    | 202551_s_at | 15.74 | BG546884  | Hs.332847 | cysteine rich transmembrane BMP regulator 1 (chordin-like)                                |
| TNFAIP3  | 202643_s_at | 15.14 | AI738896  | Hs.211600 | tumor necrosis factor, alpha-induced protein 3                                            |
| IFI44    | 214453_s_at | 14.59 | NM_006417 | Hs.82316  | interferon-induced protein 44                                                             |
| CASP10   | 205467_at   | 14.46 | NM_001230 | Hs.5353   | caspase 10, apoptosis-related cysteine peptidase                                          |
| OAS1     | 205552_s_at | 14.22 | NM_002534 | Hs.524760 | 2',5'-oligoadenylate synthetase 1, 40/46kDa                                               |
| POU2F2   | 211771_s_at | 14.16 | BC006101  | Hs.515429 | POU domain, class 2, transcription factor 2 ; POU domain, class 2, transcription factor 2 |
| EHD1     | 209037_s_at | 14.03 | AW182860  | Hs.523774 | EH-domain containing 1                                                                    |
| IL1RN    | 212659_s_at | 13.99 | AW083357  | Hs.81134  | interleukin 1 receptor antagonist                                                         |
| PDE4B    | 203708_at   | 13.8  | NM_002600 | Hs.198072 | phosphodiesterase 4B, cAMP-specific (phosphodiesterase E4 dunce homolog, Drosophila)      |
| STAT2    | 217199_s_at | 13.59 | S81491    | Hs.530595 | signal transducer and activator of transcription 2, 113kDa                                |
| STAT1    | 209969_s_at | 13.51 | BC002704  | Hs.470943 | signal transducer and activator of transcription 1, 91kDa                                 |
| OASL     | 210797_s_at | 13.49 | AF063612  | Hs.118633 | 2'-5'-oligoadenylate synthetase-like                                                      |
| IFIH1    | 219209_at   | 13.48 | NM_022168 | Hs.163173 | interferon induced with helicase C domain 1                                               |
| TNFAIP3  | 202644_s_at | 13.45 | NM_006290 | Hs.211600 | tumor necrosis factor, alpha-induced protein 3                                            |
| SP110    | 208392_x_at | 13.22 | NM_004510 | Hs.145150 | SP110 nuclear body protein                                                                |
| LOC51334 | 220014_at   | 13.19 | NM_016644 | Hs.157461 | mesenchymal stem cell protein DSC54                                                       |
| ZC3H12A  | 218810_at   | 13.07 | NM_025079 | Hs.471918 | zinc finger CCCH-type containing 12A                                                      |
| EHD1     | 209038_s_at | 13.07 | AL579035  | Hs.523774 | EH-domain containing 1                                                                    |
| IRF7     | 208436_s_at | 13.06 | NM_004030 | Hs.166120 | interferon regulatory factor 7                                                            |
| IL1RN    | 216243_s_at | 12.99 | BE563442  | Hs.81134  | interleukin 1 receptor antagonist                                                         |
| G1P2     | 205483_s_at | 12.98 | NM_005101 | Hs.458485 | interferon, alpha-inducible protein (clone IFI-15K)                                       |
| LILRB2   | 210225_x_at | 12.86 | AF009635  | Hs.534386 | leukocyte immunoglobulin-like receptor, subfamily B (with TM and ITIM domains), member 2  |
| NFKBIA   | 201502_s_at | 12.8  | AI078167  | Hs.81328  | nuclear factor of kappa light polypeptide gene enhancer in B-cells inhibitor, alpha       |
| IL10RA   | 204912_at   | 12.77 | NM_001558 | Hs.504035 | interleukin 10 receptor, alpha                                                            |
| MX2      | 204994_at   | 12.5  | NM_002463 | Hs.926    | myxovirus (influenza virus) resistance 2 (mouse)                                          |
| TNFSF10  | 202687_s_at | 12.39 | U57059    | Hs.478275 | tumor necrosis factor (ligand) superfamily, member 10                                     |
| TAP1     | 202307_s_at | 12.19 | NM_000593 | Hs.352018 | transporter 1, ATP-binding cassette, sub-family B (MDR/TAP)                               |
| DDX58    | 218943_s_at | 12.18 | NM_014314 | Hs.190622 | DEAD (Asp-Glu-Ala-Asp) box polypeptide 58                                                 |
| PBEF1    | 217739_s_at | 12.1  | NM_005746 | Hs.489615 | pre-B-cell colony enhancing factor 1                                                      |
| IFIT2    | 217502_at   | 11.81 | BE888744  | Hs.437609 | interferon-induced protein with tetratricopeptide repeats 2                               |
| PTX3     | 206157_at   | 11.78 | NM_002852 | Hs.127657 | pentraxin-related gene, rapidly induced by IL-1 beta                                      |
| BTG2     | 201235_s_at | 11.63 | BG339064  | Hs.519162 | BTG family, member 2                                                                      |
| OASL     | 205660_at   | 11.59 | NM_003733 | Hs.118633 | 2'-5'-oligoadenylate synthetase-like                                                      |
| GBP1     | 202270_at   | 11.56 | NM_002053 | Hs.62661  | guanylate binding protein 1, interferon-inducible, 67kDa                                  |
| TNFSF10  | 202688_at   | 11.5  | NM_003810 | Hs.478275 | tumor necrosis factor (ligand) superfamily, member 10                                     |
| EHD1     | 222221_x_at | 11.43 | AY007161  | Hs.523774 | EH-domain containing 1                                                                    |

|          |             |       |           |           |                                                                                                       |
|----------|-------------|-------|-----------|-----------|-------------------------------------------------------------------------------------------------------|
| NCF1     | 214084_x_at | 11.4  | AW072388  | Hs.551786 | neutrophil cytosolic factor 1 (47kDa, chronic granulomatous disease, autosomal 1)                     |
| TNFSF10  | 214329_x_at | 11.21 | AW474434  | Hs.478275 | Tumor necrosis factor (ligand) superfamily, member 10                                                 |
| KYNU     | 217388_s_at | 11.04 | D55639    | Hs.470126 | kynureninase (L-kynurenine hydrolase)                                                                 |
| NCF1     | 204961_s_at | 10.9  | NM_000265 | Hs.551786 | neutrophil cytosolic factor 1 (47kDa, chronic granulomatous disease, autosomal 1)                     |
| ICAM1    | 202637_s_at | 10.88 | AI608725  | Hs.515126 | intercellular adhesion molecule 1 (CD54), human rhinovirus receptor                                   |
| BRDG1    | 220059_at   | 10.7  | NM_012108 | Hs.435579 | BCR downstream signaling 1                                                                            |
| BTG2     | 201236_s_at | 10.65 | NM_006763 | Hs.519162 | BTG family, member 2                                                                                  |
| SAT      | 210592_s_at | 10.35 | M55580    | Hs.28491  | spermidine/spermine N1-acetyltransferase                                                              |
| RSAD2    | 213797_at   | 10.32 | AI337069  | Hs.17518  | radical S-adenosyl methionine domain containing 2                                                     |
| TFAP2A   | 204653_at   | 10.27 | BF343007  | Hs.519880 | transcription factor AP-2 alpha (activating enhancer binding protein 2 alpha)                         |
| C6orf145 | 212923_s_at | 10.06 | AK024828  | Hs.484500 | chromosome 6 open reading frame 145                                                                   |
| CD40     | 215346_at   | 9.907 | BF664114  | Hs.472860 | CD40 antigen (TNF receptor superfamily member 5)                                                      |
| PDGFRL   | 205226_at   | 9.901 | NM_006207 | Hs.458573 | platelet-derived growth factor receptor-like                                                          |
| CD44     | 204490_s_at | 9.843 | M24915    | Hs.502328 | CD44 antigen (homing function and Indian blood group system)                                          |
| C3AR1    | 209906_at   | 9.809 | U62027    | Hs.527839 | complement component 3a receptor 1                                                                    |
| GBP2     | 202748_at   | 9.758 | NM_004120 | Hs.386567 | guanylate binding protein 2, interferon-inducible ; guanylate binding protein 2, interferon-inducible |
| IFI16    | 208965_s_at | 9.757 | BG256677  | Hs.380250 | interferon, gamma-inducible protein 16                                                                |
| PML      | 206503_x_at | 9.7   | NM_002675 | Hs.526464 | promyelocytic leukemia                                                                                |
| OAS2     | 204972_at   | 9.665 | NM_016817 | Hs.414332 | 2'-5'-oligoadenylate synthetase 2, 69/71kDa                                                           |
| OAS1     | 202869_at   | 9.637 | NM_016816 | Hs.524760 | 2',5'-oligoadenylate synthetase 1, 40/46kDa                                                           |
| PLAUR    | 211924_s_at | 9.52  | AY029180  | Hs.466871 | plasminogen activator, urokinase receptor ; plasminogen activator, urokinase receptor                 |
| RRBP1    | 201206_s_at | 9.507 | NM_004587 | Hs.472213 | ribosome binding protein 1 homolog 180kDa (dog)                                                       |
| KCNJ2    | 206765_at   | 9.502 | AF153820  | Hs.1547   | potassium inwardly-rectifying channel, subfamily J, member 2                                          |
| KYNU     | 210663_s_at | 9.336 | BC000879  | Hs.470126 | kynureninase (L-kynurenine hydrolase)                                                                 |
| CD44     | 212014_x_at | 9.241 | AI493245  | Hs.502328 | CD44 antigen (homing function and Indian blood group system)                                          |
| CCR7     | 206337_at   | 9.228 | NM_001838 | Hs.370036 | chemokine (C-C motif) receptor 7 ; chemokine (C-C motif) receptor 7                                   |
| HMOX1    | 203665_at   | 9.185 | NM_002133 | Hs.517581 | heme oxygenase (decycling) 1                                                                          |
| MAFF     | 36711_at    | 9.163 | AL021977  | Hs.517617 | v-maf musculoaponeurotic fibrosarcoma oncogene homolog F (avian)                                      |
| SP110    | 208012_x_at | 9.085 | NM_004509 | Hs.145150 | SP110 nuclear body protein                                                                            |
| CKIP-1   | 218223_s_at | 9.047 | NM_016274 | Hs.438824 | CK2 interacting protein 1; HQ0024c protein                                                            |
| MARCKS   | 201670_s_at | 9.032 | M68956    | Hs.519909 | myristoylated alanine-rich protein kinase C substrate                                                 |
| TNFAIP2  | 202510_s_at | 9.004 | NM_006291 | Hs.525607 | tumor necrosis factor, alpha-induced protein 2                                                        |
| SGK      | 201739_at   | 8.977 | NM_005627 | Hs.296323 | serum/glucocorticoid regulated kinase                                                                 |
| PSCDBP   | 209606_at   | 8.908 | L06633    | Hs.270    | pleckstrin homology, Sec7 and coiled-coil domains, binding protein                                    |
| PDE4B    | 211302_s_at | 8.653 | L20966    | Hs.198072 | phosphodiesterase 4B, cAMP-specific (phosphodiesterase E4 dunce homolog, Drosophila)                  |
| SAMD9    | 219691_at   | 8.348 | NM_017654 | Hs.65641  | sterile alpha motif domain containing 9                                                               |
| SP110    | 209761_s_at | 8.325 | AA969194  | Hs.145150 | SP110 nuclear body protein                                                                            |
| CCL5     | 1405_i_at   | 8.318 | M21121    | Hs.514821 | chemokine (C-C motif) ligand 5                                                                        |
| TRIM22   | 213293_s_at | 8.204 | AA083478  | Hs.501778 | tripartite motif-containing 22                                                                        |

|          |             |       |             |           |                                                                                                 |
|----------|-------------|-------|-------------|-----------|-------------------------------------------------------------------------------------------------|
| PBEF1    | 217738_at   | 8.202 | BF575514    | Hs.489615 | pre-B-cell colony enhancing factor 1                                                            |
| OAS3     | 218400_at   | 8.17  | NM_006187   | Hs.528634 | 2'-5'-oligoadenylate synthetase 3, 100kDa                                                       |
| SART2    | 218854_at   | 8.146 | NM_013352   | Hs.486292 | squamous cell carcinoma antigen recognized by T cells 2                                         |
| PML      | 211013_x_at | 8.089 | AF230411    | Hs.526464 | promyelocytic leukemia                                                                          |
| PLA2G7   | 206214_at   | 7.93  | NM_005084   | Hs.554780 | phospholipase A2, group VII (platelet-activating factor acetylhydrolase, plasma)                |
| BCL6     | 203140_at   | 7.913 | NM_001706   | Hs.478588 | B-cell CLL/lymphoma 6 (zinc finger protein 51) ; B-cell CLL/lymphoma 6 (zinc finger protein 51) |
| PEL11    | 218319_at   | 7.878 | NM_020651   | Hs.7886   | pellino homolog 1 (Drosophila)                                                                  |
| LY6E     | 202145_at   | 7.849 | NM_002346   | Hs.521903 | lymphocyte antigen 6 complex, locus E                                                           |
| IFITM1   | 201601_x_at | 7.848 | NM_003641   | Hs.458414 | interferon induced transmembrane protein 1 (9-27)                                               |
| FLJ11259 | 218627_at   | 7.788 | NM_018370   | Hs.525634 | hypothetical protein FLJ11259                                                                   |
| ACSL1    | 207275_s_at | 7.738 | NM_001995   | Hs.406678 | acyl-CoA synthetase long-chain family member 1                                                  |
| FLJ11286 | 53720_at    | 7.727 | AI862559    | Hs.175120 | hypothetical protein FLJ11286                                                                   |
| SAT      | 203455_s_at | 7.721 | NM_002970   | Hs.28491  | spermidine/spermine N1-acetyltransferase                                                        |
| SP110    | 209762_x_at | 7.662 | AF280094    | Hs.145150 | SP110 nuclear body protein                                                                      |
| MARCKS   | 201668_x_at | 7.624 | AW163148    | Hs.519909 | myristoylated alanine-rich protein kinase C substrate                                           |
| CD209    | 207278_s_at | 7.596 | NM_021155   | Hs.278694 | CD209 antigen                                                                                   |
| CD44     | 209835_x_at | 7.594 | BC004372    | Hs.502328 | CD44 antigen (homing function and Indian blood group system)                                    |
| TNFAIP2  | 202509_s_at | 7.557 | AI862445    | Hs.525607 | tumor necrosis factor, alpha-induced protein 2                                                  |
| CRLF2    | 208303_s_at | 7.522 | NM_022148   | Hs.287729 | cytokine receptor-like factor 2                                                                 |
| RND3     | 212724_at   | 7.424 | BG054844    | Hs.6838   | Rho family GTPase 3                                                                             |
| IBRDC3   | 213038_at   | 7.366 | AL031602    | Hs.546478 | IBR domain containing 3                                                                         |
| LILRB2   | 210146_x_at | 7.254 | AF004231    | Hs.534386 | leukocyte immunoglobulin-like receptor, subfamily B (with TM and ITIM domains), member 2        |
| APOL6    | 219716_at   | 7.247 | NM_030641   | Hs.257352 | apolipoprotein L, 6                                                                             |
| SAMSN1   | 220330_s_at | 7.094 | NM_022136   | Hs.473341 | SAM domain, SH3 domain and nuclear localisation signals, 1                                      |
| CREM     | 209967_s_at | 6.976 | D14826      | Hs.200250 | cAMP responsive element modulator                                                               |
| EHD1     | 209039_x_at | 6.967 | AF001434    | Hs.523774 | EH-domain containing 1                                                                          |
| NFKB2    | 207535_s_at | 6.949 | NM_002502   | Hs.73090  | nuclear factor of kappa light polypeptide gene enhancer in B-cells 2 (p49/p100)                 |
| IFI16    | 206332_s_at | 6.829 | NM_005531   | Hs.380250 | interferon, gamma-inducible protein 16                                                          |
| IFI27    | 202411_at   | 6.774 | NM_005532   | Hs.532634 | interferon, alpha-inducible protein 27                                                          |
| IFI16    | 208966_x_at | 6.749 | AF208043    | Hs.380250 | interferon, gamma-inducible protein 16                                                          |
| CCL5     | 204655_at   | 6.675 | NM_002985   | Hs.514821 | chemokine (C-C motif) ligand 5 ; chemokine (C-C motif) ligand 5                                 |
| PSD3     | 203355_s_at | 6.671 | NM_015310   | Hs.434255 | pleckstrin and Sec7 domain containing 3                                                         |
| SOD2     | 215078_at   | 6.646 | AL050388    | Hs.487046 | superoxide dismutase 2, mitochondrial                                                           |
| TNIP1    | 207196_s_at | 6.577 | NM_006058   | Hs.355141 | TNFAIP3 interacting protein 1                                                                   |
| RGL1     | 209568_s_at | 6.564 | AF186779    | Hs.497148 | ral guanine nucleotide dissociation stimulator-like 1                                           |
| TRAF1    | 205599_at   | 6.559 | NM_005658   | Hs.531251 | TNF receptor-associated factor 1                                                                |
| CD44     | 210916_s_at | 6.557 | AF098641    | Hs.502328 | CD44 antigen (homing function and Indian blood group system)                                    |
| STAT1    | AFFX-HUMIS  | 6.537 | AFFX-HUMISC | Hs.470943 | signal transducer and activator of transcription 1, 91kDa                                       |
| CD44     | 217523_at   | 6.412 | AV700298    | Hs.502328 | CD44 antigen (homing function and Indian blood group system)                                    |

|          |             |       |             |           |                                                                                                   |
|----------|-------------|-------|-------------|-----------|---------------------------------------------------------------------------------------------------|
| NINJ1    | 203045_at   | 6.402 | NM_004148   | Hs.494457 | ninjurin 1                                                                                        |
| MARCKS   | 201669_s_at | 6.395 | NM_002356   | Hs.519909 | myristoylated alanine-rich protein kinase C substrate                                             |
| IFRG28   | 219684_at   | 6.297 | NM_022147   | Hs.43388  | 28kD interferon responsive protein                                                                |
| ACSL1    | 201963_at   | 6.292 | NM_021122   | Hs.406678 | acyl-CoA synthetase long-chain family member 1                                                    |
| ZFP36L1  | 211962_s_at | 6.262 | BG250310    | Hs.85155  | zinc finger protein 36, C3H type-like 1                                                           |
| UGCG     | 204881_s_at | 6.19  | NM_003358   | Hs.304249 | UDP-glucose ceramide glucosyltransferase                                                          |
| LYN      | 210754_s_at | 6.186 | M79321      | Hs.491767 | v-yes-1 Yamaguchi sarcoma viral related oncogene homolog                                          |
| TOR1B    | 209593_s_at | 6.129 | AF317129    | Hs.252682 | torsin family 1, member B (torsin B)                                                              |
| STAT1    | AFFX-HUMIS  | 6.088 | AFFX-HUMISC | Hs.470943 | signal transducer and activator of transcription 1, 91kDa                                         |
| WARS     | 200629_at   | 6.043 | NM_004184   | Hs.497599 | tryptophanyl-tRNA synthetase                                                                      |
| TNFRSF9  | 207536_s_at | 6.028 | NM_001561   | Hs.193418 | tumor necrosis factor receptor superfamily, member 9                                              |
| PLSCR1   | 202446_s_at | 6.027 | AI825926    | Hs.130759 | phospholipid scramblase 1                                                                         |
| CXCL12   | 209687_at   | 5.979 | U19495      | Hs.522891 | chemokine (C-X-C motif) ligand 12 (stromal cell-derived factor 1)                                 |
| SLAMF8   | 219385_at   | 5.976 | NM_020125   | Hs.438683 | SLAM family member 8                                                                              |
| AHR      | 202820_at   | 5.972 | NM_001621   | Hs.171189 | aryl hydrocarbon receptor                                                                         |
| PLEK     | 203470_s_at | 5.931 | AI433595    | Hs.468840 | pleckstrin                                                                                        |
| FTH1     | 214211_at   | 5.923 | AA083483    | Hs.558804 | ferritin, heavy polypeptide 1                                                                     |
| IER3     | 201631_s_at | 5.905 | NM_003897   | Hs.76095  | immediate early response 3                                                                        |
| LYN      | 202626_s_at | 5.902 | NM_002350   | Hs.491767 | v-yes-1 Yamaguchi sarcoma viral related oncogene homolog                                          |
| KYNU     | 204385_at   | 5.881 | NM_003937   | Hs.470126 | kynureninase (L-kynurenine hydrolase)                                                             |
| NFKB1    | 209239_at   | 5.818 | M55643      | Hs.431926 | nuclear factor of kappa light polypeptide gene enhancer in B-cells 1 (p105)                       |
| DUSP6    | 208891_at   | 5.801 | BC003143    | Hs.298654 | dual specificity phosphatase 6                                                                    |
| STAT1    | AFFX-HUMIS  | 5.687 | AFFX-HUMISC | Hs.470943 | signal transducer and activator of transcription 1, 91kDa                                         |
| TRIM34   | 221044_s_at | 5.664 | NM_021616   | Hs.125300 | tripartite motif-containing 34 ; tripartite motif-containing 6 and tripartite motif-containing 34 |
| BCL3     | 204907_s_at | 5.636 | AI829875    | Hs.31210  | B-cell CLL/lymphoma 3                                                                             |
| TRIM5    | 210705_s_at | 5.622 | AF220028    | Hs.370515 | tripartite motif-containing 5                                                                     |
| THBS1    | 201108_s_at | 5.618 | BF055462    | Hs.164226 | thrombospondin 1                                                                                  |
| DUSP6    | 208892_s_at | 5.599 | BC003143    | Hs.298654 | dual specificity phosphatase 6                                                                    |
| FCAR     | 207674_at   | 5.591 | NM_002000   | Hs.193122 | Fc fragment of IgA, receptor for                                                                  |
| PLEK     | 203471_s_at | 5.555 | NM_002664   | Hs.468840 | pleckstrin                                                                                        |
| PPP1R15A | 202014_at   | 5.549 | NM_014330   | Hs.76556  | protein phosphatase 1, regulatory (inhibitor) subunit 15A                                         |
| OLIG2    | 213825_at   | 5.507 | AA757419    | Hs.176977 | oligodendrocyte lineage transcription factor 2                                                    |
| MARCKS   | 213002_at   | 5.488 | AA770596    | Hs.519909 | Myristoylated alanine-rich protein kinase C substrate                                             |
| MMP14    | 217279_x_at | 5.476 | X83535      | Hs.2399   | matrix metalloproteinase 14 (membrane-inserted)                                                   |
| OPTN     | 202074_s_at | 5.45  | NM_021980   | Hs.332706 | optineurin                                                                                        |
| RAB6IP1  | 212561_at   | 5.396 | AA349595    | Hs.501857 | RAB6 interacting protein 1                                                                        |
| APOBEC3G | 214995_s_at | 5.391 | BF508948    | Hs.474853 | apolipoprotein B mRNA editing enzyme, catalytic polypeptide-like 3G                               |
| HBEGF    | 203821_at   | 5.376 | NM_001945   | Hs.799    | heparin-binding EGF-like growth factor                                                            |
| ME1      | 204059_s_at | 5.36  | NM_002395   | Hs.21160  | malic enzyme 1, NADP(+)-dependent, cytosolic                                                      |

|          |             |       |           |           |                                                                                          |
|----------|-------------|-------|-----------|-----------|------------------------------------------------------------------------------------------|
| NFE2L3   | 204702_s_at | 5.331 | NM_004289 | Hs.404741 | nuclear factor (erythroid-derived 2)-like 3                                              |
| VCAM1    | 203868_s_at | 5.317 | NM_001078 | Hs.109225 | vascular cell adhesion molecule 1                                                        |
| ETS2     | 201329_s_at | 5.309 | NM_005239 | Hs.517296 | v-ets erythroblastosis virus E26 oncogene homolog 2 (avian)                              |
| G0S2     | 213524_s_at | 5.303 | NM_015714 | Hs.432132 | G0/G1switch 2                                                                            |
| ADAMDEC1 | 206134_at   | 5.25  | NM_014479 | Hs.521459 | ADAM-like, decysin 1                                                                     |
| CD44     | 204489_s_at | 5.245 | NM_000610 | Hs.502328 | CD44 antigen (homing function and Indian blood group system)                             |
| CPM      | 206100_at   | 5.196 | NM_001874 | Hs.484551 | carboxypeptidase M                                                                       |
| UBE2L6   | 201649_at   | 5.177 | NM_004223 | Hs.425777 | ubiquitin-conjugating enzyme E2L 6                                                       |
| LYN      | 202625_at   | 5.118 | AI356412  | Hs.491767 | v-yes-1 Yamaguchi sarcoma viral related oncogene homolog                                 |
| PARP12   | 218543_s_at | 5.056 | NM_022750 | Hs.12646  | poly (ADP-ribose) polymerase family, member 12                                           |
| JUN      | 201466_s_at | 5.033 | NM_002228 | Hs.525704 | v-jun sarcoma virus 17 oncogene homolog (avian)                                          |
| OPTN     | 202073_at   | 5.032 | AV757675  | Hs.332706 | optineurin                                                                               |
| LILRB2   | 207697_x_at | 5.016 | NM_005874 | Hs.534386 | leukocyte immunoglobulin-like receptor, subfamily B (with TM and ITIM domains), member 2 |
| CDKN1A   | 202284_s_at | 4.978 | NM_000389 | Hs.370771 | cyclin-dependent kinase inhibitor 1A (p21, Cip1)                                         |
| ARL7     | 202208_s_at | 4.965 | BC001051  | Hs.111554 | ADP-ribosylation factor-like 7                                                           |
| CYLD     | 221903_s_at | 4.956 | BE046443  | Hs.432993 | cylindromatosis (turban tumor syndrome)                                                  |
| CHST2    | 203921_at   | 4.952 | NM_004267 | Hs.8786   | carbohydrate (N-acetylglucosamine-6-O) sulfotransferase 2                                |
| IFITM1   | 214022_s_at | 4.944 | AA749101  | Hs.458414 | interferon induced transmembrane protein 1 (9-27)                                        |
| PML      | 210362_x_at | 4.928 | AF230409  | Hs.526464 | promyelocytic leukemia                                                                   |
| NPTX2    | 213479_at   | 4.916 | U26662    | Hs.3281   | neuronal pentraxin II                                                                    |
| ATF5     | 204999_s_at | 4.906 | BC005174  | Hs.9754   | activating transcription factor 5                                                        |
| HSD11B1  | 205404_at   | 4.887 | NM_005525 | Hs.195040 | hydroxysteroid (11-beta) dehydrogenase 1                                                 |
| BID      | 204493_at   | 4.869 | NM_001196 | Hs.474150 | BH3 interacting domain death agonist                                                     |
| TMEM45A  | 219410_at   | 4.822 | NM_018004 | Hs.126598 | transmembrane protein 45A                                                                |
| UGCG     | 221765_at   | 4.798 | AI378044  | Hs.304249 | UDP-glucose ceramide glucosyltransferase                                                 |
| N4BP1    | 32069_at    | 4.763 | AB014515  | Hs.558438 | Nedd4 binding protein 1                                                                  |
| HCK      | 208018_s_at | 4.719 | NM_002110 | Hs.126521 | hemopoietic cell kinase                                                                  |
| OLIG2    | 213824_at   | 4.71  | AI870776  | Hs.176977 | oligodendrocyte lineage transcription factor 2                                           |
| BIRC4BP  | 206133_at   | 4.686 | NM_017523 | Hs.441975 | XIAP associated factor-1                                                                 |
| KIAA0286 | 212619_at   | 4.684 | AW205215  | Hs.533787 | KIAA0286 protein                                                                         |
| HIP1     | 205425_at   | 4.661 | NM_005338 | Hs.329266 | huntingtin interacting protein 1                                                         |
| ST8SIA4  | 206925_at   | 4.648 | NM_005668 | Hs.308628 | ST8 alpha-N-acetyl-neuraminide alpha-2,8-sialyltransferase 4                             |
| RELB     | 205205_at   | 4.637 | NM_006509 | Hs.307905 | v-rel reticuloendotheliosis viral oncogene homolog B                                     |
| MCTP1    | 220122_at   | 4.623 | NM_024717 | Hs.127412 | multiple C2-domains with two transmembrane regions 1                                     |
| EHD1     | 208112_x_at | 4.617 | NM_006795 | Hs.523774 | EH-domain containing 1                                                                   |
| APOBEC3G | 204205_at   | 4.584 | NM_021822 | Hs.474853 | apolipoprotein B mRNA editing enzyme, catalytic polypeptide-like 3G                      |
| FLJ20035 | 218986_s_at | 4.578 | NM_017631 | Hs.481141 | hypothetical protein FLJ20035                                                            |
| TNFRSF1B | 203508_at   | 4.578 | NM_001066 | Hs.256278 | tumor necrosis factor receptor superfamily, member 1B                                    |
| TCF4     | 212386_at   | 4.554 | BF592782  | Hs.200285 | Transcription factor 4                                                                   |

|          |             |       |           |           |                                                               |
|----------|-------------|-------|-----------|-----------|---------------------------------------------------------------|
| PLSCR1   | 202430_s_at | 4.515 | NM_021105 | Hs.130759 | phospholipid scramblase 1                                     |
| HERC5    | 219863_at   | 4.501 | NM_016323 | Hs.26663  | hect domain and RLD 5                                         |
| EPB41L3  | 212681_at   | 4.48  | AI770004  | Hs.213394 | erythrocyte membrane protein band 4.1-like 3                  |
| RAB8B    | 219210_s_at | 4.478 | NM_016530 | Hs.389733 | RAB8B, member RAS oncogene family                             |
| CFLAR    | 208485_x_at | 4.476 | NM_003879 | Hs.390736 | CASP8 and FADD-like apoptosis regulator                       |
| CD44     | 212063_at   | 4.443 | BE903880  | Hs.502328 | CD44 antigen (homing function and Indian blood group system)  |
| PAX5     | 221969_at   | 4.433 | BF510692  | Hs.126365 | Paired box gene 5 (B-cell lineage specific activator)         |
| FGL2     | 204834_at   | 4.426 | NM_006682 | Hs.520989 | fibrinogen-like 2                                             |
| APOL1    | 209546_s_at | 4.426 | AF323540  | Hs.114309 | apolipoprotein L, 1                                           |
| ATP2B1   | 209281_s_at | 4.384 | M95541    | Hs.506276 | ATPase, Ca <sup>++</sup> transporting, plasma membrane 1      |
| LOC54103 | 213142_x_at | 4.349 | AV700415  | Hs.549342 | hypothetical protein LOC54103                                 |
| FLJ11286 | 218429_s_at | 4.328 | NM_018381 | Hs.175120 | hypothetical protein FLJ11286                                 |
| INDO     | 210029_at   | 4.31  | M34455    | Hs.840    | indoleamine-pyrrole 2,3 dioxygenase                           |
| C1orf24  | 217966_s_at | 4.298 | NM_022083 | Hs.518662 | chromosome 1 open reading frame 24                            |
| KITLG    | 207029_at   | 4.288 | NM_000899 | Hs.1048   | KIT ligand                                                    |
| IFI35    | 209417_s_at | 4.277 | BC001356  | Hs.50842  | interferon-induced protein 35                                 |
| EIF2AK2  | 204211_x_at | 4.268 | NM_002759 | Hs.131431 | eukaryotic translation initiation factor 2-alpha kinase 2     |
| CFLAR    | 209939_x_at | 4.26  | AF005775  | Hs.390736 | CASP8 and FADD-like apoptosis regulator                       |
| DUSP1    | 201041_s_at | 4.243 | NM_004417 | Hs.171695 | dual specificity phosphatase 1                                |
| PDGFA    | 205463_s_at | 4.232 | NM_002607 | Hs.376032 | platelet-derived growth factor alpha polypeptide              |
| OAS2     | 206553_at   | 4.204 | NM_002535 | Hs.414332 | 2'-5'-oligoadenylate synthetase 2, 69/71kDa                   |
| SNAI1    | 219480_at   | 4.204 | NM_005985 | Hs.48029  | snail homolog 1 (Drosophila)                                  |
| IL1A     | 210118_s_at | 4.201 | M15329    | Hs.1722   | interleukin 1, alpha                                          |
| ATF5     | 204998_s_at | 4.188 | NM_012068 | Hs.9754   | activating transcription factor 5                             |
| CXCL9    | 203915_at   | 4.185 | NM_002416 | Hs.77367  | chemokine (C-X-C motif) ligand 9                              |
| TCTEL1   | 201999_s_at | 4.177 | NM_006519 | Hs.445999 | t-complex-associated-testis-expressed 1-like 1                |
| SPRED2   | 212466_at   | 4.171 | AW138902  | Hs.59332  | sprouty-related, EVH1 domain containing 2                     |
| ATF3     | 202672_s_at | 4.151 | NM_001674 | Hs.460    | activating transcription factor 3                             |
| CD40     | 35150_at    | 4.121 | X60592    | Hs.472860 | CD40 antigen (TNF receptor superfamily member 5)              |
| CD209    | 207277_at   | 4.117 | AF290886  | Hs.278694 | CD209 antigen                                                 |
| FGR      | 208438_s_at | 4.103 | NM_005248 | Hs.1422   | Gardner-Rasheed feline sarcoma viral (v-fgr) oncogene homolog |
| PANX1    | 204715_at   | 4.1   | NM_015368 | Hs.503584 | pannexin 1                                                    |
| PIM1     | 209193_at   | 4.099 | M24779    | Hs.81170  | pim-1 oncogene ; pim-1 oncogene                               |
| ADORA2A  | 205013_s_at | 4.059 | NM_000675 | Hs.197029 | adenosine A2a receptor                                        |
| CASP7    | 207181_s_at | 4.05  | NM_001227 | Hs.9216   | caspase 7, apoptosis-related cysteine peptidase               |
| JUN      | 201464_x_at | 4.049 | BG491844  | Hs.525704 | v-jun sarcoma virus 17 oncogene homolog (avian)               |
| GAS7     | 202191_s_at | 4.04  | BE439987  | Hs.462214 | growth arrest-specific 7                                      |
| N4BP1    | 204601_at   | 4.031 | NM_014664 | Hs.558438 | Nedd4 binding protein 1                                       |
| MYD88    | 209124_at   | 4.029 | U70451    | Hs.82116  | myeloid differentiation primary response gene (88)            |



|           |             |       |             |           |                                                                                           |
|-----------|-------------|-------|-------------|-----------|-------------------------------------------------------------------------------------------|
| ATP1B1    | 201242_s_at | 4.018 | BC000006    | Hs.291196 | ATPase, Na <sup>+</sup> /K <sup>+</sup> transporting, beta 1 polypeptide                  |
| ATP1B1    | 201243_s_at | 4.006 | NM_001677   | Hs.291196 | ATPase, Na <sup>+</sup> /K <sup>+</sup> transporting, beta 1 polypeptide                  |
| PHF11     | 221816_s_at | 4.004 | BF055474    | Hs.369039 | PHD finger protein 11                                                                     |
| FLJ38348  | 213294_at   | 4.002 | AV755522    | Hs.546523 | Hypothetical protein FLJ38348                                                             |
| ISGF3G    | 203882_at   | 3.989 | NM_006084   | Hs.1706   | interferon-stimulated transcription factor 3, gamma 48kDa                                 |
| C6orf149  | 218561_s_at | 3.987 | NM_020408   | Hs.387755 | chromosome 6 open reading frame 149                                                       |
| STAT1     | AFFX-HUMIS  | 3.973 | AFFX-HUMISC | Hs.470943 | signal transducer and activator of transcription 1, 91kDa                                 |
| NFKBIE    | 203927_at   | 3.972 | NM_004556   | Hs.458276 | nuclear factor of kappa light polypeptide gene enhancer in B-cells inhibitor, epsilon     |
| LOC54103  | 222150_s_at | 3.969 | AK026747    | Hs.549342 | hypothetical protein LOC54103                                                             |
| LOC391020 | 216565_x_at | 3.965 | AL121994    |           | similar to Interferon-induced transmembrane protein 3 (Interferon-inducible protein 1-8U) |
| AIM2      | 206513_at   | 3.957 | NM_004833   | Hs.281898 | absent in melanoma 2                                                                      |
| ENPP2     | 209392_at   | 3.941 | L35594      | Hs.190977 | ectonucleotide pyrophosphatase/phosphodiesterase 2 (autotaxin)                            |
| STAT2     | 205170_at   | 3.926 | NM_005419   | Hs.530595 | signal transducer and activator of transcription 2, 113kDa                                |
| CFLAR     | 211862_x_at | 3.92  | AF015451    | Hs.390736 | CASP8 and FADD-like apoptosis regulator                                                   |
| ME1       | 204058_at   | 3.92  | AL049699    | Hs.21160  | Malic enzyme 1, NADP(+)-dependent, cytosolic                                              |
| KIAA0286  | 212621_at   | 3.915 | AB006624    | Hs.533787 | KIAA0286 protein                                                                          |
| TRIM36    | 219736_at   | 3.907 | NM_018700   | Hs.519514 | tripartite motif-containing 36                                                            |
| CASP5     | 207500_at   | 3.907 | NM_004347   | Hs.213327 | caspase 5, apoptosis-related cysteine peptidase                                           |
| ZFP36L1   | 211965_at   | 3.905 | BE620915    | Hs.85155  | zinc finger protein 36, C3H type-like 1                                                   |
| CFLAR     | 211317_s_at | 3.886 | AF041461    | Hs.390736 | CASP8 and FADD-like apoptosis regulator                                                   |
| KMO       | 205306_x_at | 3.877 | AI074145    |           | kynurenine 3-monooxygenase (kynurenine 3-hydroxylase)                                     |
| CALM1     | 211984_at   | 3.862 | AI653730    | Hs.282410 | calmodulin 1 (phosphorylase kinase, delta)                                                |
| SLC15A3   | 219593_at   | 3.859 | NM_016582   | Hs.237856 | solute carrier family 15, member 3                                                        |
| C1orf38   | 207571_x_at | 3.858 | NM_004848   | Hs.10649  | chromosome 1 open reading frame 38                                                        |
| IBRDC3    | 36564_at    | 3.826 | W27419      | Hs.546478 | IBR domain containing 3                                                                   |
| PHLDA1    | 217996_at   | 3.824 | AA576961    | Hs.558462 | pleckstrin homology-like domain, family A, member 1                                       |
| PLAUR     | 210845_s_at | 3.818 | U08839      | Hs.466871 | plasminogen activator, urokinase receptor                                                 |
| PHLDA1    | 217997_at   | 3.806 | AI795908    | Hs.558462 | pleckstrin homology-like domain, family A, member 1                                       |
| JUNB      | 201473_at   | 3.803 | NM_002229   | Hs.25292  | jun B proto-oncogene                                                                      |
| DOCK4     | 205003_at   | 3.796 | NM_014705   | Hs.118140 | dedicator of cytokinesis 4                                                                |
| ICAM1     | 215485_s_at | 3.752 | AA284705    | Hs.515126 | intercellular adhesion molecule 1 (CD54), human rhinovirus receptor                       |
| FTH1      | 200748_s_at | 3.752 | NM_002032   | Hs.558804 | ferritin, heavy polypeptide 1                                                             |
| EPB41L3   | 206710_s_at | 3.748 | NM_012307   | Hs.213394 | erythrocyte membrane protein band 4.1-like 3                                              |
| C1orf38   | 210785_s_at | 3.748 | AB035482    | Hs.10649  | chromosome 1 open reading frame 38                                                        |
| MT2A      | 212185_x_at | 3.741 | NM_005953   | Hs.418241 | metallothionein 2A                                                                        |
| P2RY5     | 218589_at   | 3.717 | NM_005767   | Hs.123464 | purinergic receptor P2Y, G-protein coupled, 5                                             |
| SMAD7     | 204790_at   | 3.713 | NM_005904   | Hs.465087 | SMAD, mothers against DPP homolog 7 (Drosophila)                                          |
| SLC39A8   | 219869_s_at | 3.709 | NM_022154   | Hs.288034 | solute carrier family 39 (zinc transporter), member 8                                     |
| NRIP1     | 202600_s_at | 3.699 | AI824012    | Hs.155017 | nuclear receptor interacting protein 1                                                    |

|          |             |       |           |           |                                                                                   |
|----------|-------------|-------|-----------|-----------|-----------------------------------------------------------------------------------|
| TNFSF7   | 206508_at   | 3.679 | NM_001252 | Hs.501497 | tumor necrosis factor (ligand) superfamily, member 7                              |
| UXS1     | 219675_s_at | 3.668 | NM_025076 | Hs.469561 | UDP-glucuronate decarboxylase 1                                                   |
| RGS16    | 209325_s_at | 3.662 | U94829    | Hs.413297 | regulator of G-protein signalling 16                                              |
| CCR1     | 205099_s_at | 3.659 | NM_001295 | Hs.301921 | chemokine (C-C motif) receptor 1                                                  |
| KMO      | 211138_s_at | 3.654 | BC005297  |           | kynurenine 3-monooxygenase (kynurenine 3-hydroxylase)                             |
| PPP1R15A | 37028_at    | 3.651 | U83981    | Hs.76556  | protein phosphatase 1, regulatory (inhibitor) subunit 15A                         |
| TFAP2A   | 204654_s_at | 3.644 | NM_003220 | Hs.519880 | transcription factor AP-2 alpha (activating enhancer binding protein 2 alpha)     |
| CYP1B1   | 202435_s_at | 3.637 | AU154504  | Hs.154654 | cytochrome P450, family 1, subfamily B, polypeptide 1                             |
| DPY19L1  | 212792_at   | 3.622 | AB020684  | Hs.408623 | dpy-19-like 1 (C. elegans)                                                        |
| SLC31A2  | 204204_at   | 3.622 | NM_001860 | Hs.24030  | solute carrier family 31 (copper transporters), member 2                          |
| CASP1    | 206011_at   | 3.6   | AI719655  | Hs.2490   | caspase 1, apoptosis-related cysteine peptidase (interleukin 1, beta, convertase) |
| BID      | 211725_s_at | 3.584 | BC005884  | Hs.474150 | BH3 interacting domain death agonist ; BH3 interacting domain death agonist       |
|          | 215617_at   | 3.574 | AU145711  | Hs.224293 | CDNA FLJ11754 fis, clone HEMBA1005588                                             |
| PSTPIP2  | 219938_s_at | 3.572 | NM_024430 | Hs.368623 | proline-serine-threonine phosphatase interacting protein 2                        |
| CRIM1    | 202552_s_at | 3.565 | NM_016441 | Hs.332847 | cysteine rich transmembrane BMP regulator 1 (chordin-like)                        |
| TCF4     | 212382_at   | 3.551 | BF433429  | Hs.200285 | Transcription factor 4                                                            |
| MTMR11   | 205076_s_at | 3.547 | NM_006697 | Hs.425144 | myotubularin related protein 11                                                   |
| GADD45B  | 207574_s_at | 3.546 | NM_015675 | Hs.110571 | growth arrest and DNA-damage-inducible, beta                                      |
| LNK      | 203320_at   | 3.531 | NM_005475 | Hs.506784 | lymphocyte adaptor protein                                                        |
| MTF1     | 205322_s_at | 3.525 | AW182367  | Hs.471991 | metal-regulatory transcription factor 1                                           |
| LPPR4    | 213496_at   | 3.52  | AW592563  | Hs.13245  | plasticity related gene 1                                                         |
| CYP1B1   | 202437_s_at | 3.504 | NM_000104 | Hs.154654 | cytochrome P450, family 1, subfamily B, polypeptide 1                             |
| IER5     | 218611_at   | 3.499 | NM_016545 | Hs.15725  | immediate early response 5                                                        |
| ALAS1    | 205633_s_at | 3.496 | NM_000688 | Hs.476308 | aminolevulinate, delta-, synthase 1                                               |
| KIAA0247 | 202181_at   | 3.491 | NM_014734 | Hs.440025 | KIAA0247                                                                          |
| NAB2     | 212803_at   | 3.477 | BF337329  | Hs.159223 | NGFI-A binding protein 2 (EGR1 binding protein 2)                                 |
| ZCCHC2   | 219062_s_at | 3.477 | NM_017742 | Hs.114191 | zinc finger, CCHC domain containing 2                                             |
| WSB1     | 201295_s_at | 3.474 | BF111821  | Hs.446017 | WD repeat and SOCS box-containing 1                                               |
| CALM1    | 211985_s_at | 3.469 | AI653730  | Hs.282410 | calmodulin 1 (phosphorylase kinase, delta)                                        |
| RAFTLIN  | 212646_at   | 3.466 | D42043    | Hs.98910  | raft-linking protein                                                              |
| QPCT     | 205174_s_at | 3.462 | NM_012413 | Hs.79033  | glutaminy-peptide cyclotransferase (glutaminy cyclase)                            |
| RTN1     | 210222_s_at | 3.461 | BC000314  | Hs.368626 | reticulon 1                                                                       |
| BHLHB2   | 201169_s_at | 3.453 | BG326045  | Hs.171825 | basic helix-loop-helix domain containing, class B, 2                              |
| LPXN     | 216250_s_at | 3.447 | X77598    | Hs.125474 | leupaxin                                                                          |
| GPR35    | 210264_at   | 3.429 | AF089087  | Hs.239891 | G protein-coupled receptor 35                                                     |
| FGD2     | 215602_at   | 3.426 | AK024456  | Hs.509664 | FYVE, RhoGEF and PH domain containing 2                                           |
| CTNND1   | 208862_s_at | 3.425 | AW073672  | Hs.166011 | catenin (cadherin-associated protein), delta 1                                    |
| PPARD    | 37152_at    | 3.423 | L07592    | Hs.485196 | peroxisome proliferative activated receptor, delta                                |
| SKIL     | 217591_at   | 3.415 | BF725121  | Hs.536655 | SKI-like                                                                          |

|         |             |       |           |           |                                                                                                     |
|---------|-------------|-------|-----------|-----------|-----------------------------------------------------------------------------------------------------|
| S100A12 | 205863_at   | 3.399 | NM_005621 | Hs.19413  | S100 calcium binding protein A12 (calgranulin C) ; S100 calcium binding protein A12 (calgranulin C) |
| WTAP    | 210285_x_at | 3.382 | BC000383  | Hs.446091 | Wilms tumor 1 associated protein                                                                    |
| THBD    | 203888_at   | 3.377 | NM_000361 | Hs.2030   | thrombomodulin                                                                                      |
| HIVEP2  | 212641_at   | 3.366 | AL023584  | Hs.510172 | human immunodeficiency virus type I enhancer binding protein 2                                      |
| ATP2B1  | 215716_s_at | 3.359 | L14561    | Hs.506276 | ATPase, Ca <sup>++</sup> transporting, plasma membrane 1                                            |
| EMR2    | 207610_s_at | 3.358 | NM_013447 | Hs.531619 | egf-like module containing, mucin-like, hormone receptor-like 2                                     |
| HBEGF   | 38037_at    | 3.356 | M60278    | Hs.799    | heparin-binding EGF-like growth factor                                                              |
| GAS7    | 207704_s_at | 3.35  | NM_003644 | Hs.462214 | growth arrest-specific 7                                                                            |
| STAT1   | 200887_s_at | 3.35  | NM_007315 | Hs.470943 | signal transducer and activator of transcription 1, 91kDa                                           |
| FAS     | 215719_x_at | 3.318 | X83493    | Hs.244139 | Fas (TNF receptor superfamily, member 6)                                                            |
| SLC39A8 | 209267_s_at | 3.295 | AB040120  | Hs.288034 | solute carrier family 39 (zinc transporter), member 8                                               |
| PRDM1   | 217192_s_at | 3.294 | AL022067  | Hs.436023 | PR domain containing 1, with ZNF domain                                                             |
| RUNX1T1 | 205529_s_at | 3.292 | NM_004349 | Hs.368431 | runt-related transcription factor 1; translocated to, 1 (cyclin D-related)                          |
| ARL7    | 202206_at   | 3.275 | AW450363  | Hs.111554 | ADP-ribosylation factor-like 7                                                                      |
| SLC7A11 | 217678_at   | 3.266 | AA488687  | Hs.390594 | solute carrier family 7, (cationic amino acid transporter, y+ system) member 11                     |
| BHLHB2  | 201170_s_at | 3.258 | NM_003670 | Hs.171825 | basic helix-loop-helix domain containing, class B, 2                                                |
| TNFAIP8 | 208296_x_at | 3.247 | NM_014350 | Hs.271955 | tumor necrosis factor, alpha-induced protein 8                                                      |
| TUBB2   | 204141_at   | 3.238 | NM_001069 | Hs.512712 | tubulin, beta 2                                                                                     |
| FMNL1   | 204789_at   | 3.221 | NM_005892 | Hs.100217 | formin-like 1                                                                                       |
| ATP2C1  | 209934_s_at | 3.219 | AF225981  | Hs.567267 | ATPase, Ca <sup>++</sup> transporting, type 2C, member 1                                            |
| IFNGR2  | 201642_at   | 3.203 | NM_005534 | Hs.517240 | interferon gamma receptor 2 (interferon gamma transducer 1)                                         |
| SP100   | 202864_s_at | 3.202 | NM_003113 | Hs.369056 | nuclear antigen Sp100                                                                               |
| THBD    | 203887_s_at | 3.202 | NM_000361 | Hs.2030   | thrombomodulin                                                                                      |
| SDC4    | 202071_at   | 3.201 | NM_002999 | Hs.252189 | syndecan 4 (amphiglycan, ryudocan)                                                                  |
| NR4A3   | 207978_s_at | 3.197 | NM_006981 | Hs.279522 | nuclear receptor subfamily 4, group A, member 3                                                     |
| IFITM3  | 212203_x_at | 3.197 | BF338947  | Hs.374650 | interferon induced transmembrane protein 3 (1-8U)                                                   |
| FEZ1    | 205973_at   | 3.19  | NM_022549 | Hs.224008 | fasciculation and elongation protein zeta 1 (zygin I)                                               |
| DTX4    | 212611_at   | 3.183 | AV728526  | Hs.558464 | deltex 4 homolog (Drosophila)                                                                       |
| CFLAR   | 210563_x_at | 3.178 | U97075    | Hs.390736 | CASP8 and FADD-like apoptosis regulator                                                             |
| PDE4B   | 222326_at   | 3.16  | AW973834  | Hs.198072 | Phosphodiesterase 4B, cAMP-specific (phosphodiesterase E4 dunce homolog, Drosophila)                |
| SLC16A3 | 202856_s_at | 3.144 | NM_004207 | Hs.500761 | solute carrier family 16 (monocarboxylic acid transporters), member 3                               |
| CSPG2   | 204619_s_at | 3.144 | BF590263  | Hs.443681 | chondroitin sulfate proteoglycan 2 (versican)                                                       |
| CLIC4   | 201559_s_at | 3.125 | AF109196  | Hs.440544 | chloride intracellular channel 4                                                                    |
| ENPP4   | 204160_s_at | 3.124 | AW194947  | Hs.54037  | ectonucleotide pyrophosphatase/phosphodiesterase 4 (putative function)                              |
| CLIC4   | 221881_s_at | 3.114 | AI638420  | Hs.440544 | chloride intracellular channel 4                                                                    |
| TCF4    | 213891_s_at | 3.113 | AI927067  | Hs.200285 | Transcription factor 4                                                                              |
| ETS2    | 201328_at   | 3.113 | AL575509  | Hs.517296 | v-ets erythroblastosis virus E26 oncogene homolog 2 (avian)                                         |
| PPIF    | 201490_s_at | 3.11  | NM_005729 | Hs.381072 | peptidylprolyl isomerase F (cyclophilin F)                                                          |
| SLC7A11 | 209921_at   | 3.106 | AB040875  | Hs.390594 | solute carrier family 7, (cationic amino acid transporter, y+ system) member 11                     |

|           |             |       |           |           |                                                                                       |
|-----------|-------------|-------|-----------|-----------|---------------------------------------------------------------------------------------|
| CASP1     | 211368_s_at | 3.105 | U13700    | Hs.2490   | caspase 1, apoptosis-related cysteine peptidase (interleukin 1, beta, convertase)     |
| KLF9      | 203543_s_at | 3.084 | NM_001206 | Hs.150557 | Kruppel-like factor 9                                                                 |
| MMP14     | 202827_s_at | 3.073 | AU149305  | Hs.2399   | matrix metallopeptidase 14 (membrane-inserted)                                        |
| SLC25A28  | 221432_s_at | 3.056 | NM_031212 | Hs.403790 | solute carrier family 25, member 28 ; solute carrier family 25, member 28             |
| SLC16A3   | 202855_s_at | 3.044 | AL513917  | Hs.500761 | solute carrier family 16 (monocarboxylic acid transporters), member 3                 |
| FKBP5     | 204560_at   | 3.032 | NM_004117 | Hs.558328 | FK506 binding protein 5                                                               |
| CHMP5     | 218085_at   | 3.027 | NM_015961 | Hs.415534 | chromatin modifying protein 5                                                         |
| CYP1B1    | 202436_s_at | 3.02  | AU144855  | Hs.154654 | cytochrome P450, family 1, subfamily B, polypeptide 1                                 |
| PSD3      | 218613_at   | 3.015 | NM_018422 | Hs.434255 | pleckstrin and Sec7 domain containing 3                                               |
| MT1X      | 208581_x_at | 3.01  | NM_005952 | Hs.374950 | metallothionein 1X                                                                    |
| LITAF     | 200706_s_at | 3.004 | NM_004862 | Hs.459940 | lipopolysaccharide-induced TNF factor                                                 |
| IFI44     | 214059_at   | 2.987 | BE049439  | Hs.82316  | Interferon-induced protein 44                                                         |
| SLIT2     | 209897_s_at | 2.984 | AF055585  | Hs.558436 | slit homolog 2 (Drosophila)                                                           |
| RAP2C     | 218669_at   | 2.968 | NM_021183 | Hs.119889 | RAP2C, member of RAS oncogene family                                                  |
| HIST2H2AA | 214290_s_at | 2.962 | A1313324  | Hs.530461 | histone 2, H2aa                                                                       |
| FTHP1     | 211628_x_at | 2.952 | J04755    | Hs.453583 | ferritin, heavy polypeptide pseudogene 1 ; ferritin, heavy polypeptide pseudogene 1   |
| CFLAR     | 209508_x_at | 2.939 | AF005774  | Hs.390736 | CASP8 and FADD-like apoptosis regulator ; CASP8 and FADD-like apoptosis regulator     |
| CKB       | 200884_at   | 2.932 | NM_001823 | Hs.173724 | creatine kinase, brain                                                                |
| PEA15     | 200788_s_at | 2.929 | NM_003768 | Hs.517216 | phosphoprotein enriched in astrocytes 15                                              |
| PITPNA    | 201192_s_at | 2.928 | NM_006224 | Hs.429819 | phosphatidylinositol transfer protein, alpha                                          |
| SQRDL     | 217995_at   | 2.919 | NM_021199 | Hs.511251 | sulfide quinone reductase-like (yeast)                                                |
| TNFAIP8   | 210260_s_at | 2.918 | BC005352  | Hs.271955 | tumor necrosis factor, alpha-induced protein 8                                        |
| KIAA0226  | 212733_at   | 2.908 | A1798908  | Hs.478868 | KIAA0226                                                                              |
| NAB1      | 208047_s_at | 2.907 | NM_005966 | Hs.107474 | NGFI-A binding protein 1 (EGR1 binding protein 1)                                     |
| IRF2      | 203275_at   | 2.905 | NM_002199 | Hs.374097 | interferon regulatory factor 2                                                        |
| GAS7      | 211067_s_at | 2.9   | BC006454  | Hs.462214 | growth arrest-specific 7 ; growth arrest-specific 7                                   |
| DUSP5     | 209457_at   | 2.893 | U16996    | Hs.2128   | dual specificity phosphatase 5                                                        |
| CHMP5     | 219356_s_at | 2.888 | NM_016410 | Hs.415534 | chromatin modifying protein 5                                                         |
| WSB1      | 201294_s_at | 2.88  | N24643    | Hs.446017 | WD repeat and SOCS box-containing 1                                                   |
| HIVEP2    | 212642_s_at | 2.874 | AL023584  | Hs.510172 | human immunodeficiency virus type I enhancer binding protein 2                        |
| SLC11A2   | 203124_s_at | 2.874 | NM_000617 | Hs.505545 | solute carrier family 11 (proton-coupled divalent metal ion transporters), member 2   |
| MALT1     | 208309_s_at | 2.871 | NM_006785 | Hs.180566 | mucosa associated lymphoid tissue lymphoma translocation gene 1                       |
| MAP2K3    | 215498_s_at | 2.864 | AA780381  | Hs.514012 | mitogen-activated protein kinase kinase 3 ; mitogen-activated protein kinase kinase 3 |
| NAB1      | 209272_at   | 2.857 | AF045451  | Hs.107474 | NGFI-A binding protein 1 (EGR1 binding protein 1)                                     |
| EBI2      | 205419_at   | 2.854 | NM_004951 | Hs.508545 | Epstein-Barr virus induced gene 2 (lymphocyte-specific G protein-coupled receptor)    |
| IRF1      | 202531_at   | 2.85  | NM_002198 | Hs.436061 | interferon regulatory factor 1                                                        |
| MARCKSL1  | 200644_at   | 2.849 | NM_023009 | Hs.75061  | MARCKS-like 1                                                                         |
| MT1K      | 216336_x_at | 2.847 | AL031602  | Hs.188518 | Metallothionein 1M                                                                    |
| G1P3      | 204415_at   | 2.842 | NM_022873 | Hs.523847 | interferon, alpha-inducible protein (clone IFI-6-16)                                  |

|                 |             |       |           |           |                                                                                   |
|-----------------|-------------|-------|-----------|-----------|-----------------------------------------------------------------------------------|
| CD80            | 207176_s_at | 2.832 | NM_005191 | Hs.838    | CD80 antigen (CD28 antigen ligand 1, B7-1 antigen)                                |
| RASSF4          | 49306_at    | 2.825 | AI890191  | Hs.522895 | Ras association (RalGDS/AF-6) domain family 4                                     |
| IKBKE           | 204549_at   | 2.818 | NM_014002 | Hs.321045 | inhibitor of kappa light polypeptide gene enhancer in B-cells, kinase epsilon     |
| PEA15           | 200787_s_at | 2.813 | BC002426  | Hs.517216 | phosphoprotein enriched in astrocytes 15                                          |
| RGS16           | 209324_s_at | 2.809 | BF304996  | Hs.413297 | regulator of G-protein signalling 16                                              |
| SSH1            | 221753_at   | 2.804 | AI651213  | Hs.199763 | slingshot homolog 1 (Drosophila)                                                  |
| P2RX4           | 204088_at   | 2.801 | NM_002560 | Hs.321709 | purinergic receptor P2X, ligand-gated ion channel, 4                              |
| SLC2A3          | 202499_s_at | 2.799 | NM_006931 | Hs.419240 | solute carrier family 2 (facilitated glucose transporter), member 3               |
| WARS            | 200628_s_at | 2.797 | M61715    | Hs.497599 | tryptophanyl-tRNA synthetase                                                      |
| LAP3            | 217933_s_at | 2.797 | NM_015907 | Hs.479264 | leucine aminopeptidase 3                                                          |
| CASP1           | 211367_s_at | 2.793 | U13699    | Hs.2490   | caspase 1, apoptosis-related cysteine peptidase (interleukin 1, beta, convertase) |
| TANK            | 207616_s_at | 2.784 | NM_004180 | Hs.132257 | TRAF family member-associated NFKB activator                                      |
| RAP2C           | 218668_s_at | 2.781 | NM_021183 | Hs.119889 | RAP2C, member of RAS oncogene family                                              |
| PTPRE           | 221840_at   | 2.761 | AA775177  | Hs.558374 | protein tyrosine phosphatase, receptor type, E                                    |
| REL             | 206036_s_at | 2.76  | NM_002908 | Hs.370620 | v-rel reticuloendotheliosis viral oncogene homolog (avian)                        |
| IGFBP4          | 201508_at   | 2.757 | NM_001552 | Hs.462998 | insulin-like growth factor binding protein 4                                      |
| DDIT4           | 202887_s_at | 2.742 | NM_019058 | Hs.523012 | DNA-damage-inducible transcript 4                                                 |
| GCLM            | 203925_at   | 2.737 | NM_002061 | Hs.315562 | glutamate-cysteine ligase, modifier subunit                                       |
| TRIM25          | 206911_at   | 2.732 | NM_005082 | Hs.528952 | tripartite motif-containing 25                                                    |
| STK4            | 211085_s_at | 2.73  | Z25430    | Hs.472838 | serine/threonine kinase 4 ; serine/threonine kinase 4                             |
| CASP1           | 209970_x_at | 2.726 | M87507    | Hs.2490   | caspase 1, apoptosis-related cysteine peptidase (interleukin 1, beta, convertase) |
| KAL1            | 205206_at   | 2.719 | NM_000216 | Hs.521869 | Kallmann syndrome 1 sequence                                                      |
| CLIC4           | 201560_at   | 2.718 | NM_013943 | Hs.440544 | chloride intracellular channel 4                                                  |
| MAP2K3          | 207667_s_at | 2.717 | NM_002756 | Hs.514012 | mitogen-activated protein kinase kinase 3                                         |
| USP12           | 215886_x_at | 2.701 | AF022790  | Hs.562024 | ubiquitin specific peptidase 12                                                   |
| PHACTR4         | 219235_s_at | 2.7   | NM_023923 | Hs.225641 | phosphatase and actin regulator 4                                                 |
| OGFRL1          | 219582_at   | 2.684 | NM_024576 | Hs.567296 | opioid growth factor receptor-like 1                                              |
| DAPP1           | 219290_x_at | 2.68  | NM_014395 | Hs.436271 | dual adaptor of phosphotyrosine and 3-phosphoinositides                           |
|                 | 64488_at    | 2.675 | AW003091  | Hs.6217   | CDNA FLJ46713 fis, clone TRACH3016885                                             |
| PTPNS1          | 202897_at   | 2.672 | AB023430  | Hs.128846 | protein tyrosine phosphatase, non-receptor type substrate 1                       |
| CASP1           | 211366_x_at | 2.664 | U13698    | Hs.2490   | caspase 1, apoptosis-related cysteine peptidase (interleukin 1, beta, convertase) |
| NFE2L2          | 201146_at   | 2.663 | NM_006164 | Hs.155396 | nuclear factor (erythroid-derived 2)-like 2                                       |
| STK17A          | 202693_s_at | 2.637 | AW194730  | Hs.268887 | serine/threonine kinase 17a (apoptosis-inducing)                                  |
| PVRL2           | 203149_at   | 2.629 | NM_002856 | Hs.326371 | poliovirus receptor-related 2 (herpesvirus entry mediator B)                      |
| PLCL1           | 205934_at   | 2.62  | NM_006226 | Hs.153322 | phospholipase C-like 1                                                            |
| CFLAR           | 210564_x_at | 2.619 | AF009619  | Hs.390736 | CASP8 and FADD-like apoptosis regulator                                           |
| PML ; LOC161527 | 211014_s_at | 2.618 | AF230410  | Hs.534573 | promyelocytic leukemia ; hypothetical protein LOC161527                           |
| PNRC1           | 209034_at   | 2.618 | AF279899  | Hs.75969  | proline-rich nuclear receptor coactivator 1                                       |
| NQO1            | 201467_s_at | 2.61  | AI039874  | Hs.406515 | NAD(P)H dehydrogenase, quinone 1                                                  |

|          |             |       |           |           |                                                                                             |
|----------|-------------|-------|-----------|-----------|---------------------------------------------------------------------------------------------|
| pp9099   | 204436_at   | 2.599 | NM_025201 | Hs.458575 | PH domain-containing protein                                                                |
| ADAR     | 201786_s_at | 2.593 | NM_001111 | Hs.12341  | adenosine deaminase, RNA-specific                                                           |
| BTG3     | 213134_x_at | 2.59  | A1765445  | Hs.473420 | BTG family, member 3                                                                        |
| ABCC1    | 202804_at   | 2.585 | A1539710  | Hs.391464 | ATP-binding cassette, sub-family C (CFTR/MRP), member 1                                     |
| RAI17    | 212124_at   | 2.584 | AF070622  | Hs.193118 | retinoic acid induced 17                                                                    |
| HLA-E    | 200905_x_at | 2.581 | NM_005516 | Hs.381008 | major histocompatibility complex, class I, E                                                |
| PIM2     | 204269_at   | 2.576 | NM_006875 | Hs.496096 | pim-2 oncogene                                                                              |
| SLA      | 203760_s_at | 2.575 | U44403    | Hs.75367  | Src-like-adaptor ; Src-like-adaptor                                                         |
| TNFRSF21 | 218856_at   | 2.568 | NM_016629 | Hs.443577 | tumor necrosis factor receptor superfamily, member 21                                       |
| DMXL2    | 212820_at   | 2.565 | AB020663  | Hs.511386 | Dmx-like 2                                                                                  |
| PPIF     | 201489_at   | 2.564 | BC005020  | Hs.381072 | peptidylprolyl isomerase F (cyclophilin F)                                                  |
| MGC10986 | 218600_at   | 2.563 | NM_030576 | Hs.555988 | hypothetical protein MGC10986                                                               |
| RIT1     | 209882_at   | 2.554 | AF084462  | Hs.491234 | Ras-like without CAAX 1                                                                     |
| MGLL     | 211026_s_at | 2.547 | BC006230  | Hs.277035 | monoglyceride lipase ; monoglyceride lipase                                                 |
| RUNX3    | 204198_s_at | 2.543 | AA541630  | Hs.170019 | runt-related transcription factor 3                                                         |
| ECGF1    | 204858_s_at | 2.539 | NM_001953 | Hs.546251 | endothelial cell growth factor 1 (platelet-derived)                                         |
| VASP     | 202205_at   | 2.536 | NM_003370 | Hs.515469 | vasodilator-stimulated phosphoprotein                                                       |
| HIF1A    | 200989_at   | 2.533 | NM_001530 | Hs.509554 | hypoxia-inducible factor 1, alpha subunit (basic helix-loop-helix transcription factor)     |
| CHST11   | 219634_at   | 2.529 | NM_018413 | Hs.17569  | carbohydrate (chondroitin 4) sulfotransferase 11                                            |
| BLZF1    | 203840_at   | 2.522 | NM_003666 | Hs.494326 | basic leucine zipper nuclear factor 1 (JEM-1)                                               |
| SEC24A   | 212902_at   | 2.517 | BE645231  | Hs.211612 | SEC24 related gene family, member A (S. cerevisiae)                                         |
| BTG3     | 205548_s_at | 2.515 | NM_006806 | Hs.473420 | BTG family, member 3                                                                        |
| SPHK1    | 219257_s_at | 2.511 | NM_021972 | Hs.68061  | sphingosine kinase 1                                                                        |
| KCNQ3    | 206573_at   | 2.508 | NM_004519 | Hs.374023 | potassium voltage-gated channel, KQT-like subfamily, member 3                               |
|          | 222303_at   | 2.5   | AV700891  |           |                                                                                             |
| ACVR2A   | 205327_s_at | 2.488 | NM_001616 | Hs.470174 | activin A receptor, type IIA                                                                |
| EPB41L3  | 211776_s_at | 2.485 | BC006141  | Hs.213394 | erythrocyte membrane protein band 4.1-like 3 ; erythrocyte membrane protein band 4.1-like 3 |
| GTF2B    | 208066_s_at | 2.485 | NM_001514 | Hs.481852 | general transcription factor IIB ; general transcription factor IIB                         |
| MT1H     | 206461_x_at | 2.482 | NM_005951 | Hs.438462 | metallothionein 1H                                                                          |
| LTB      | 207339_s_at | 2.475 | NM_002341 | Hs.376208 | lymphotoxin beta (TNF superfamily, member 3)                                                |
| KCNN4    | 204401_at   | 2.468 | NM_002250 | Hs.10082  | potassium intermediate/small conductance calcium-activated channel, subfamily N, member 4   |
| LITAF    | 200704_at   | 2.461 | AB034747  | Hs.459940 | lipopolysaccharide-induced TNF factor                                                       |
| PPARD    | 208044_s_at | 2.46  | NM_006238 | Hs.485196 | peroxisome proliferative activated receptor, delta                                          |
| TCF4     | 203753_at   | 2.456 | NM_003199 | Hs.200285 | transcription factor 4                                                                      |
| DOK2     | 214054_at   | 2.449 | A1828929  | Hs.71215  | docking protein 2, 56kDa                                                                    |
| IKBKE    | 214398_s_at | 2.433 | AW340333  | Hs.321045 | inhibitor of kappa light polypeptide gene enhancer in B-cells, kinase epsilon               |
| ABCC1    | 202805_s_at | 2.431 | NM_004996 | Hs.391464 | ATP-binding cassette, sub-family C (CFTR/MRP), member 1                                     |
| C6orf32  | 206707_x_at | 2.428 | NM_015864 | Hs.558439 | chromosome 6 open reading frame 32                                                          |
| MOBK1B   | 201297_s_at | 2.427 | AK023321  | Hs.196437 | MOB1, Mps One Binder kinase activator-like 1B (yeast)                                       |

|              |             |       |           |           |                                                                                               |
|--------------|-------------|-------|-----------|-----------|-----------------------------------------------------------------------------------------------|
| PSMB9        | 204279_at   | 2.423 | NM_002800 | Hs.381081 | proteasome (prosome, macropain) subunit, beta type, 9 (large multifunctional peptidase 2)     |
| LIMK2        | 217475_s_at | 2.422 | AC002073  | Hs.474596 | LIM domain kinase 2                                                                           |
| PTPRC        | 212587_s_at | 2.418 | AI809341  | Hs.192039 | protein tyrosine phosphatase, receptor type, C                                                |
| CCR1         | 205098_at   | 2.41  | AI421071  | Hs.301921 | chemokine (C-C motif) receptor 1                                                              |
| NF2          | 211091_s_at | 2.4   | AF122828  | Hs.187898 | neurofibromin 2 (bilateral acoustic neuroma)                                                  |
| TCF7L2       | 212762_s_at | 2.399 | AI375916  | Hs.501080 | transcription factor 7-like 2 (T-cell specific, HMG-box)                                      |
| EPHA7        | 206852_at   | 2.398 | NM_004440 | Hs.73962  | EPH receptor A7                                                                               |
| C6orf62      | 213875_x_at | 2.396 | BG252842  | Hs.519930 | chromosome 6 open reading frame 62                                                            |
| ROBO1        | 213194_at   | 2.395 | BF059159  | Hs.13640  | roundabout, axon guidance receptor, homolog 1 (Drosophila)                                    |
| RUNX3        | 204197_s_at | 2.394 | NM_004350 | Hs.170019 | runt-related transcription factor 3                                                           |
| SEC14L1      | 202082_s_at | 2.393 | AV748469  | Hs.464184 | SEC14-like 1 ( <i>S. cerevisiae</i> )                                                         |
| TSPAN31      | 203227_s_at | 2.391 | NM_005981 | Hs.50984  | tetraspanin 31                                                                                |
| SDCBP        | 200958_s_at | 2.388 | NM_005625 | Hs.200804 | syndecan binding protein (syntenin)                                                           |
| RHBDL6       | 219202_at   | 2.382 | NM_024599 | Hs.464157 | rhomboid, veinlet-like 6 (Drosophila)                                                         |
| RPL35        | 211456_x_at | 2.38  | AF333388  | Hs.449044 | Similar to 60S ribosomal protein L35                                                          |
| BTG1         | 200920_s_at | 2.379 | AL535380  | Hs.255935 | B-cell translocation gene 1, anti-proliferative                                               |
| SP100        | 210218_s_at | 2.367 | U36501    | Hs.369056 | nuclear antigen Sp100                                                                         |
| TFEC         | 206715_at   | 2.364 | NM_012252 | Hs.125962 | transcription factor EC                                                                       |
| CSPG2        | 215646_s_at | 2.356 | R94644    | Hs.443681 | chondroitin sulfate proteoglycan 2 (versican) ; chondroitin sulfate proteoglycan 2 (versican) |
| GADD45B      | 209305_s_at | 2.356 | AF078077  | Hs.110571 | growth arrest and DNA-damage-inducible, beta                                                  |
| TNFRSF21     | 214581_x_at | 2.351 | BE568134  | Hs.443577 | tumor necrosis factor receptor superfamily, member 21                                         |
| CDC42        | 208727_s_at | 2.346 | BC002711  | Hs.467637 | cell division cycle 42 (GTP binding protein, 25kDa)                                           |
| ST3GAL2      | 205346_at   | 2.336 | NM_006927 | Hs.368611 | ST3 beta-galactoside alpha-2,3-sialyltransferase 2                                            |
| MTHFD2L      | 220346_at   | 2.336 | NM_025001 | Hs.535007 | methylenetetrahydrofolate dehydrogenase (NADP+ dependent) 2-like                              |
| PRKAG2       | 218292_s_at | 2.334 | NM_016203 | Hs.549162 | protein kinase, AMP-activated, gamma 2 non-catalytic subunit                                  |
| LILRB1       | 207104_x_at | 2.333 | NM_006669 | Hs.149924 | leukocyte immunoglobulin-like receptor, subfamily B (with TM and ITIM domains), member 1      |
| YRDC         | 218647_s_at | 2.332 | NM_024640 | Hs.301564 | yrnC domain containing ( <i>E.coli</i> )                                                      |
| CALM1        | 209563_x_at | 2.33  | BC000454  | Hs.282410 | calmodulin 1 (phosphorylase kinase, delta)                                                    |
| ECOP         | 208091_s_at | 2.329 | NM_030796 | Hs.488307 | EGFR-coamplified and overexpressed protein ; EGFR-coamplified and overexpressed protein       |
| WTAP         | 203137_at   | 2.325 | NM_004906 | Hs.446091 | Wilms tumor 1 associated protein                                                              |
| MCL1         | 200798_x_at | 2.324 | NM_021960 | Hs.532826 | myeloid cell leukemia sequence 1 (BCL2-related)                                               |
| CALM1        | 200653_s_at | 2.314 | M27319    | Hs.282410 | calmodulin 1 (phosphorylase kinase, delta)                                                    |
| SLC2A3       | 222088_s_at | 2.31  | AA778684  | Hs.419240 | solute carrier family 2 (facilitated glucose transporter), member 3                           |
| RG2          | 202388_at   | 2.305 | NM_002923 | Hs.78944  | regulator of G-protein signalling 2, 24kDa                                                    |
| RCN1         | 201063_at   | 2.296 | NM_002901 | Hs.97887  | reticulocalbin 1, EF-hand calcium binding domain                                              |
| GPD2         | 210007_s_at | 2.295 | U36310    | Hs.148266 | glycerol-3-phosphate dehydrogenase 2 (mitochondrial)                                          |
| DKFZp564K142 | 221553_at   | 2.293 | AL136636  | Hs.323562 | implantation-associated protein                                                               |
| NAV3         | 204823_at   | 2.291 | NM_014903 | Hs.306322 | neuron navigator 3                                                                            |
| NAGK         | 218231_at   | 2.277 | NM_017567 | Hs.7036   | N-acetylglucosamine kinase ; N-acetylglucosamine kinase                                       |

|          |             |       |           |           |                                                                                                     |
|----------|-------------|-------|-----------|-----------|-----------------------------------------------------------------------------------------------------|
| CD59     | 200985_s_at | 2.277 | NM_000611 | Hs.278573 | CD59 antigen p18-20 (antigen identified by monoclonal antibodies 16.3A5, EJ16, EJ30, EL32 and G344) |
| ZC3HAV1  | 220104_at   | 2.273 | NM_020119 | Hs.133512 | zinc finger CCCH-type, antiviral 1                                                                  |
| STAT3    | 208991_at   | 2.267 | AA634272  | Hs.463059 | signal transducer and activator of transcription 3 (acute-phase response factor)                    |
| VEGF     | 211527_x_at | 2.265 | M27281    | Hs.73793  | vascular endothelial growth factor                                                                  |
| SERPINB1 | 212268_at   | 2.255 | NM_030666 | Hs.381167 | serpin peptidase inhibitor, clade B (ovalbumin), member 1                                           |
| VRK2     | 205126_at   | 2.25  | NM_006296 | Hs.468623 | vaccinia related kinase 2                                                                           |
| LIMK2    | 202193_at   | 2.247 | NM_005569 | Hs.474596 | LIM domain kinase 2                                                                                 |
| SPRED2   | 212458_at   | 2.247 | H97931    | Hs.59332  | sprouty-related, EVH1 domain containing 2                                                           |
| GNA15    | 205349_at   | 2.245 | NM_002068 | Hs.73797  | guanine nucleotide binding protein (G protein), alpha 15 (Gq class)                                 |
| TRIM21   | 204804_at   | 2.239 | NM_003141 | Hs.532357 | tripartite motif-containing 21                                                                      |
| POLS     | 202466_at   | 2.231 | NM_006999 | Hs.481542 | polymerase (DNA directed) sigma                                                                     |
| MMP9     | 203936_s_at | 2.227 | NM_004994 | Hs.297413 | matrix metalloproteinase 9 (gelatinase B, 92kDa gelatinase, 92kDa type IV collagenase)              |
| CDC73    | 218578_at   | 2.224 | NM_024529 | Hs.378996 | cell division cycle 73, Paf1/RNA polymerase II complex component, homolog (S. cerevisiae)           |
| TMPO     | 203432_at   | 2.221 | AW272611  | Hs.11355  | thymopoietin                                                                                        |
| ABCA1    | 203504_s_at | 2.22  | NM_005502 | Hs.429294 | ATP-binding cassette, sub-family A (ABC1), member 1                                                 |
| LGALS9   | 203236_s_at | 2.219 | NM_009587 | Hs.81337  | lectin, galactoside-binding, soluble, 9 (galectin 9)                                                |
| NAB1     | 211139_s_at | 2.219 | AF045452  | Hs.107474 | NGFI-A binding protein 1 (EGR1 binding protein 1)                                                   |
| SSH1     | 221752_at   | 2.218 | AL041728  | Hs.199763 | Slingshot homolog 1 (Drosophila)                                                                    |
| DAF      | 201925_s_at | 2.217 | NM_000574 | Hs.527653 | decay accelerating factor for complement (CD55, Cromer blood group system)                          |
| CYBB     | 203922_s_at | 2.217 | AI308863  | Hs.292356 | cytochrome b-245, beta polypeptide (chronic granulomatous disease)                                  |
| PDLIM5   | 203243_s_at | 2.214 | NM_006457 | Hs.480311 | PDZ and LIM domain 5                                                                                |
| PML      | 209640_at   | 2.211 | M79462    | Hs.526464 | promyelocytic leukemia                                                                              |
| CASP4    | 209310_s_at | 2.208 | U25804    | Hs.138378 | caspase 4, apoptosis-related cysteine peptidase                                                     |
|          | 213281_at   | 2.205 | BE327172  |           |                                                                                                     |
| TANK     | 209451_at   | 2.203 | U59863    | Hs.132257 | TRAF family member-associated NFKB activator                                                        |
| EMP3     | 203729_at   | 2.2   | NM_001425 | Hs.9999   | epithelial membrane protein 3                                                                       |
| CSF2RB   | 205159_at   | 2.199 | AV756141  | Hs.285401 | colony stimulating factor 2 receptor, beta, low-affinity (granulocyte-macrophage)                   |
| VEGF     | 210512_s_at | 2.197 | AF022375  | Hs.73793  | vascular endothelial growth factor                                                                  |
| ZBED1    | 203043_at   | 2.196 | NM_004729 | Hs.458462 | zinc finger, BED-type containing 1                                                                  |
| RTN1     | 203485_at   | 2.194 | NM_021136 | Hs.368626 | reticulon 1                                                                                         |
| MCL1     | 200796_s_at | 2.193 | BF594446  | Hs.532826 | myeloid cell leukemia sequence 1 (BCL2-related)                                                     |
| USP12    | 213327_s_at | 2.192 | AI820101  | Hs.42400  | ubiquitin specific peptidase 12                                                                     |
| MTF1     | 205323_s_at | 2.192 | NM_005955 | Hs.471991 | metal-regulatory transcription factor 1                                                             |
| CTSL     | 202087_s_at | 2.188 | NM_001912 | Hs.418123 | cathepsin L                                                                                         |
| HIVEP1   | 204512_at   | 2.185 | NM_002114 | Hs.128930 | human immunodeficiency virus type I enhancer binding protein 1                                      |
| STK3     | 204068_at   | 2.183 | NM_006281 | Hs.492333 | serine/threonine kinase 3 (STE20 homolog, yeast)                                                    |
| LMNA     | 212086_x_at | 2.179 | AK026584  | Hs.491359 | lamin A/C                                                                                           |
| HRH1     | 205579_at   | 2.173 | NM_000861 | Hs.1570   | histamine receptor H1                                                                               |
| RASSF4   | 221578_at   | 2.172 | AF260335  | Hs.522895 | Ras association (RalGDS/AF-6) domain family 4                                                       |



|               |             |       |           |           |                                                                                                          |
|---------------|-------------|-------|-----------|-----------|----------------------------------------------------------------------------------------------------------|
| SQSTM1        | 201471_s_at | 2.169 | NM_003900 | Hs.529892 | sequestosome 1                                                                                           |
| DDX3X         | 212514_x_at | 2.166 | R60068    | Hs.380774 | DEAD (Asp-Glu-Ala-Asp) box polypeptide 3, X-linked                                                       |
| CHST12        | 218927_s_at | 2.166 | NM_018641 | Hs.213088 | carbohydrate (chondroitin 4) sulfotransferase 12                                                         |
| C1orf24       | 217967_s_at | 2.165 | AF288391  | Hs.518662 | chromosome 1 open reading frame 24                                                                       |
| OGFR          | 211512_s_at | 2.164 | AF172450  | Hs.67896  | opioid growth factor receptor                                                                            |
| MOBK1B        | 201298_s_at | 2.163 | BC003398  | Hs.196437 | MOB1, Mps One Binder kinase activator-like 1B (yeast)                                                    |
| GRINA         | 212090_at   | 2.161 | AL571424  | Hs.339697 | glutamate receptor, ionotropic, N-methyl D-aspartate-associated protein 1 (glutamate binding)            |
| TAPBP         | 208829_at   | 2.16  | AF029750  | Hs.370937 | TAP binding protein (tapasin)                                                                            |
| BLVRA         | 203771_s_at | 2.155 | AA740186  | Hs.488143 | biliverdin reductase A                                                                                   |
| IL6ST         | 204864_s_at | 2.15  | NM_002184 | Hs.532082 | interleukin 6 signal transducer (gp130, oncostatin M receptor)                                           |
| DDX3X         | 212515_s_at | 2.149 | BG492602  | Hs.380774 | DEAD (Asp-Glu-Ala-Asp) box polypeptide 3, X-linked                                                       |
| ZFP36         | 201531_at   | 2.147 | NM_003407 | Hs.534052 | zinc finger protein 36, C3H type, homolog (mouse)                                                        |
| HLA-G ; HLA-H | 217436_x_at | 2.143 | M80469    | Hs.512152 | HLA-G histocompatibility antigen, class I, G ; major histocompatibility complex, class I, H (pseudogene) |
| C1orf106      | 219010_at   | 2.143 | NM_018265 | Hs.518997 | chromosome 1 open reading frame 106                                                                      |
| RIPK1         | 209941_at   | 2.142 | U50062    | Hs.519842 | receptor (TNFRSF)-interacting serine-threonine kinase 1                                                  |
| JMJD3         | 41386_i_at  | 2.142 | AB002344  | Hs.553519 | jumonji domain containing 3                                                                              |
| EDEM1         | 203279_at   | 2.142 | NM_014674 | Hs.224616 | ER degradation enhancer, mannosidase alpha-like 1                                                        |
| EHD4          | 209536_s_at | 2.141 | AF320070  | Hs.143703 | EH-domain containing 4                                                                                   |
| GADD45A       | 203725_at   | 2.138 | NM_001924 | Hs.80409  | growth arrest and DNA-damage-inducible, alpha                                                            |
| RHOQ          | 212117_at   | 2.13  | BF978689  | Hs.549125 | ras homolog gene family, member Q                                                                        |
| SP100         | 202863_at   | 2.129 | NM_003113 | Hs.369056 | nuclear antigen Sp100                                                                                    |
| TANK          | 210458_s_at | 2.128 | BC003388  | Hs.132257 | TRAF family member-associated NFKB activator                                                             |
| NRIP1         | 202599_s_at | 2.125 | NM_003489 | Hs.155017 | nuclear receptor interacting protein 1                                                                   |
| NADK          | 215159_s_at | 2.124 | AI239732  | Hs.456572 | NAD kinase                                                                                               |
| PTGER4        | 204896_s_at | 2.123 | AI675173  | Hs.199248 | prostaglandin E receptor 4 (subtype EP4)                                                                 |
| KIAA0226      | 212735_at   | 2.117 | BF448041  | Hs.478868 | KIAA0226                                                                                                 |
| RRM2          | 201890_at   | 2.111 | BE966236  | Hs.226390 | ribonucleotide reductase M2 polypeptide                                                                  |
| GMIP          | 218913_s_at | 2.11  | NM_016573 | Hs.49427  | GEM interacting protein                                                                                  |
| LOC93349      | 214791_at   | 2.109 | AK023116  | Hs.471582 | hypothetical protein BC004921                                                                            |
| SRD5A1        | 204675_at   | 2.109 | NM_001047 | Hs.552    | steroid-5-alpha-reductase, alpha polypeptide 1 (3-oxo-5 alpha-steroid delta 4-dehydrogenase alpha 1)     |
| HLA-A         | 215313_x_at | 2.105 | AA573862  | Hs.181244 | major histocompatibility complex, class I, A                                                             |
| MT1E          | 212859_x_at | 2.104 | BF217861  | Hs.534330 | metallothionein 1E (functional)                                                                          |
| RIN3          | 60471_at    | 2.103 | AA625133  | Hs.326822 | Ras and Rab interactor 3                                                                                 |
| WSB2          | 213734_at   | 2.1   | BG260658  | Hs.506985 | WD repeat and SOCS box-containing 2                                                                      |
| ARTS-1        | 210385_s_at | 2.098 | AF106037  | Hs.436186 | type 1 tumor necrosis factor receptor shedding aminopeptidase regulator                                  |
| KIAA0674      | 76897_s_at  | 2.096 | AA628140  | Hs.522351 | KIAA0674                                                                                                 |
| VILL          | 209950_s_at | 2.093 | BC004300  | Hs.103665 | villin-like                                                                                              |
| UBE2D1        | 214590_s_at | 2.093 | AL545760  | Hs.129683 | ubiquitin-conjugating enzyme E2D 1 (UBC4/5 homolog, yeast)                                               |
| FPRL1         | 210772_at   | 2.093 | M88107    | Hs.99855  | formyl peptide receptor-like 1 ; formyl peptide receptor-like 1                                          |

|          |             |       |           |           |                                                                                                      |
|----------|-------------|-------|-----------|-----------|------------------------------------------------------------------------------------------------------|
| HIP1     | 205426_s_at | 2.091 | U79734    | Hs.329266 | huntingtin interacting protein 1                                                                     |
| AP1G1    | 203350_at   | 2.091 | NM_001128 | Hs.461253 | adaptor-related protein complex 1, gamma 1 subunit                                                   |
| PLEKHF2  | 218640_s_at | 2.089 | NM_024613 | Hs.29724  | pleckstrin homology domain containing, family F (with FYVE domain) member 2                          |
| CTNND1   | 208407_s_at | 2.085 | NM_001331 | Hs.166011 | catenin (cadherin-associated protein), delta 1                                                       |
| STX12    | 212112_s_at | 2.082 | AI816243  | Hs.523855 | syntaxin 12                                                                                          |
| OGFR     | 202841_x_at | 2.082 | NM_007346 | Hs.67896  | opioid growth factor receptor                                                                        |
| HPSE     | 219403_s_at | 2.081 | NM_006665 | Hs.44227  | heparanase                                                                                           |
| TRADD    | 1729_at     | 2.078 | L41690    | Hs.460996 | TNFRSF1A-associated via death domain                                                                 |
| BIRC4    | 206536_s_at | 2.075 | U32974    | Hs.356076 | baculoviral IAP repeat-containing 4                                                                  |
| C6orf62  | 208809_s_at | 2.074 | AL136632  | Hs.519930 | chromosome 6 open reading frame 62                                                                   |
| SLA      | 203761_at   | 2.074 | NM_006748 | Hs.75367  | Src-like-adaptor ; Src-like-adaptor                                                                  |
| CFLAR    | 211316_x_at | 2.073 | AF009616  | Hs.390736 | CASP8 and FADD-like apoptosis regulator                                                              |
| CD38     | 205692_s_at | 2.072 | NM_001775 | Hs.479214 | CD38 antigen (p45)                                                                                   |
| TMEM4    | 209797_at   | 2.072 | BC001027  | Hs.8752   | transmembrane protein 4                                                                              |
| PMAIP1   | 204285_s_at | 2.071 | AI857639  | Hs.96     | phorbol-12-myristate-13-acetate-induced protein 1                                                    |
| C6orf62  | 213872_at   | 2.062 | BE465032  | Hs.519930 | Chromosome 6 open reading frame 62                                                                   |
| MT1G     | 204745_x_at | 2.061 | NM_005950 | Hs.433391 | metallothionein 1G                                                                                   |
| NRP1     | 212298_at   | 2.061 | BE620457  | Hs.131704 | neuropilin 1                                                                                         |
| JAK2     | 205841_at   | 2.061 | NM_004972 | Hs.434374 | Janus kinase 2 (a protein tyrosine kinase)                                                           |
| CTNND1   | 211240_x_at | 2.059 | AB002382  | Hs.166011 | catenin (cadherin-associated protein), delta 1                                                       |
| SERPINB1 | 213572_s_at | 2.059 | AI554300  | Hs.381167 | serpin peptidase inhibitor, clade B (ovalbumin), member 1                                            |
| NUP62    | 202153_s_at | 2.058 | NM_016553 | Hs.467133 | nucleoporin 62kDa                                                                                    |
| MALT1    | 210017_at   | 2.056 | AF070528  | Hs.180566 | mucosa associated lymphoid tissue lymphoma translocation gene 1                                      |
| NR4A2    | 204622_x_at | 2.052 | NM_006186 | Hs.165258 | nuclear receptor subfamily 4, group A, member 2                                                      |
| SEC24A   | 212900_at   | 2.051 | AJ131244  | Hs.211612 | SEC24 related gene family, member A (S. cerevisiae)                                                  |
| RAB8A    | 208819_at   | 2.05  | BC002977  | Hs.5947   | RAB8A, member RAS oncogene family                                                                    |
| SLCO3A1  | 219229_at   | 2.048 | NM_013272 | Hs.311187 | solute carrier organic anion transporter family, member 3A1                                          |
| TRIM26   | 202702_at   | 2.046 | NM_003449 | Hs.485041 | tripartite motif-containing 26                                                                       |
| HPS5     | 204544_at   | 2.043 | NM_007216 | Hs.437599 | Hermansky-Pudlak syndrome 5                                                                          |
| ABCA1    | 203505_at   | 2.04  | AF285167  | Hs.429294 | ATP-binding cassette, sub-family A (ABC1), member 1                                                  |
| CPD      | 201942_s_at | 2.039 | D85390    | Hs.446079 | carboxypeptidase D                                                                                   |
| EXOSC9   | 205061_s_at | 2.039 | NM_005033 | Hs.91728  | exosome component 9                                                                                  |
| TMEM4    | 202857_at   | 2.038 | NM_014255 | Hs.8752   | transmembrane protein 4                                                                              |
| FLJ13855 | 217750_s_at | 2.036 | NM_023079 | Hs.514297 | hypothetical protein FLJ13855                                                                        |
| RAB13    | 202252_at   | 2.033 | NM_002870 | Hs.558375 | RAB13, member RAS oncogene family                                                                    |
| TESK1    | 204106_at   | 2.032 | NM_006285 | Hs.79358  | testis-specific kinase 1                                                                             |
| DPYSL2   | 200762_at   | 2.031 | NM_001386 | Hs.173381 | dihydropyrimidinase-like 2                                                                           |
| SNX11    | 220140_s_at | 2.027 | NM_013323 | Hs.15827  | sorting nexin 11                                                                                     |
| MTHFD2   | 201761_at   | 2.025 | NM_006636 | Hs.469030 | methylenetetrahydrofolate dehydrogenase (NADP+ dependent) 2, methenyltetrahydrofolate cyclohydrolase |

|           |             |       |           |           |                                                                           |
|-----------|-------------|-------|-----------|-----------|---------------------------------------------------------------------------|
| AGRN      | 212285_s_at | 2.022 | AW008051  | Hs.273330 | agrin                                                                     |
| ENPP2     | 210839_s_at | 2.02  | D45421    | Hs.190977 | ectonucleotide pyrophosphatase/phosphodiesterase 2 (autotaxin)            |
| GAS7      | 202192_s_at | 2.016 | NM_005890 | Hs.462214 | growth arrest-specific 7                                                  |
| NUP153    | 202097_at   | 2.015 | NM_005124 | Hs.121088 | nucleoporin 153kDa                                                        |
| LSS       | 211019_s_at | 2.013 | D63807    | Hs.517366 | lanosterol synthase (2,3-oxidosqualene-lanosterol cyclase)                |
| KPNA1     | 213741_s_at | 2.012 | BF575685  | Hs.161008 | karyopherin alpha 1 (importin alpha 5)                                    |
| AGPAT3    | 219723_x_at | 2.012 | NM_020132 | Hs.248785 | 1-acylglycerol-3-phosphate O-acyltransferase 3                            |
| SN        | 44673_at    | 2.01  | N53555    | Hs.31869  | Sialoadhesin                                                              |
| PRKCH     | 218764_at   | 2.006 | NM_024064 | Hs.333907 | protein kinase C, eta                                                     |
| ITGAV     | 202351_at   | 2.004 | AI093579  | Hs.436873 | integrin, alpha V (vitronectin receptor, alpha polypeptide, antigen CD51) |
| TOP1      | 208900_s_at | 2.004 | AW025108  | Hs.472737 | topoisomerase (DNA) I                                                     |
| PLAGL1    | 209318_x_at | 2.004 | BG547855  | Hs.444975 | pleiomorphic adenoma gene-like 1                                          |
| SPATA5L1  | 215694_at   | 2.002 | AK022348  | Hs.369657 | spermatogenesis associated 5-like 1                                       |
| JMJD2A    | 203204_s_at | 0.499 | BC002558  | Hs.155983 | jumonji domain containing 2A                                              |
| C8orf52   | 218905_at   | 0.499 | NM_017864 | Hs.521693 | chromosome 8 open reading frame 52                                        |
| COX11     | 211727_s_at | 0.498 | BC005895  | Hs.96530  | COX11 homolog, cytochrome c oxidase assembly protein (yeast)              |
| MYST1     | 221820_s_at | 0.498 | AK024102  | Hs.533803 | MYST histone acetyltransferase 1                                          |
| EDD1      | 208883_at   | 0.497 | BF515424  | Hs.492445 | E3 ubiquitin protein ligase, HECT domain containing, 1                    |
| GCAT      | 36475_at    | 0.496 | Z97630    | Hs.54609  | glycine C-acetyltransferase (2-amino-3-ketobutyrate coenzyme A ligase)    |
| FLJ20534  | 218646_at   | 0.495 | NM_017867 | Hs.406756 | hypothetical protein FLJ20534                                             |
| CGI-116   | 218628_at   | 0.495 | NM_016053 | Hs.405692 | CGI-116 protein                                                           |
| CACYBP    | 201381_x_at | 0.495 | AF057356  | Hs.508524 | calcyclin binding protein                                                 |
| IDII      | 204615_x_at | 0.495 | NM_004508 | Hs.283652 | isopentenyl-diphosphate delta isomerase 1                                 |
| FADS1     | 208962_s_at | 0.494 | BE540552  | Hs.503546 | fatty acid desaturase 1                                                   |
| LOC81558  | 221249_s_at | 0.494 | NM_030802 | Hs.514308 | C/EBP-induced protein ; C/EBP-induced protein                             |
| EBNA1BP2  | 201323_at   | 0.493 | NM_006824 | Hs.346868 | EBNA1 binding protein 2                                                   |
| FLJ14827  | 44065_at    | 0.492 | AI937468  | Hs.524762 | hypothetical protein FLJ14827                                             |
| DACH1     | 205471_s_at | 0.492 | AW772082  | Hs.129452 | dachshund homolog 1 (Drosophila)                                          |
| GATM      | 203178_at   | 0.492 | NM_001482 | Hs.75335  | glycine amidinotransferase (L-arginine:glycine amidinotransferase)        |
| NY-REN-58 | 219644_at   | 0.492 | NM_016122 | Hs.279209 | NY-REN-58 antigen                                                         |
| INPP5A    | 203006_at   | 0.49  | NM_005539 | Hs.523360 | inositol polyphosphate-5-phosphatase, 40kDa                               |
| USP48     | 220079_s_at | 0.49  | NM_018391 | Hs.467524 | ubiquitin specific peptidase 48                                           |
| AKAP10    | 213396_s_at | 0.489 | AA456929  | Hs.462457 | A kinase (PRKA) anchor protein 10                                         |
| MPST      | 203524_s_at | 0.488 | NM_021126 | Hs.248267 | mercaptopyruvate sulfurtransferase                                        |
| ST14      | 202005_at   | 0.487 | NM_021978 | Hs.504315 | suppression of tumorigenicity 14 (colon carcinoma, matriptase, epithin)   |
| KIAA0564  | 212946_at   | 0.487 | AK025432  | Hs.368282 | KIAA0564 protein                                                          |
| PILRB     | 220954_s_at | 0.487 | NM_013440 | Hs.530084 | paired immunoglobulin-like type 2 receptor beta                           |
| GGA2      | 214190_x_at | 0.486 | AI799984  | Hs.460336 | golgi associated, gamma adaptin ear containing, ARF binding protein 2     |
| ZFR       | 201857_at   | 0.486 | NM_016107 | Hs.435231 | zinc finger RNA binding protein                                           |

|           |             |       |           |           |                                                                                                   |
|-----------|-------------|-------|-----------|-----------|---------------------------------------------------------------------------------------------------|
| MT        | 213132_s_at | 0.485 | AL022237  | Hs.349111 | malonyl-CoA:acyl carrier protein transacylase, mitochondrial                                      |
| OPN3      | 219032_x_at | 0.483 | NM_014322 | Hs.409081 | opsin 3 (encephalopsin, panopsin)                                                                 |
| PRKACB    | 202742_s_at | 0.483 | NM_002731 | Hs.487325 | protein kinase, cAMP-dependent, catalytic, beta                                                   |
| PTPN18    | 213521_at   | 0.482 | AW575379  | Hs.516390 | Protein tyrosine phosphatase, non-receptor type 18 (brain-derived)                                |
| R3HDM1    | 202754_at   | 0.481 | NM_015361 | Hs.412462 | R3H domain containing 1                                                                           |
| CBFA2T3   | 208056_s_at | 0.481 | NM_005187 | Hs.513811 | core-binding factor, runt domain, alpha subunit 2; translocated to, 3                             |
| MIR16     | 202593_s_at | 0.479 | NM_016641 | Hs.512607 | membrane interacting protein of RGS16                                                             |
| FAM21C    | 211068_x_at | 0.479 | BC006456  | Hs.365286 | family with sequence similarity 21, member C                                                      |
|           | 209478_at   | 0.479 | U95006    |           |                                                                                                   |
| C1orf22   | 220926_s_at | 0.479 | NM_025191 | Hs.523811 | chromosome 1 open reading frame 22                                                                |
| ZFR       | 201856_s_at | 0.478 | BC000376  | Hs.435231 | zinc finger RNA binding protein                                                                   |
| UNG       | 202330_s_at | 0.478 | NM_003362 | Hs.191334 | uracil-DNA glycosylase                                                                            |
| EIF2C2    | 222294_s_at | 0.477 | AW971415  | Hs.449415 | Eukaryotic translation initiation factor 2C, 2                                                    |
| RAGD      | 221523_s_at | 0.477 | AL138717  | Hs.485938 | Ras-related GTP binding D                                                                         |
| PDCL3     | 219043_s_at | 0.477 | NM_024065 | Hs.449206 | phosducin-like 3 ; hypothetical protein FLJ12205                                                  |
| SMARCA2   | 217707_x_at | 0.477 | A1535683  | Hs.298990 | SWI/SNF related, matrix associated, actin dependent regulator of chromatin, subfamily a, member 2 |
| CLNS1A    | 209143_s_at | 0.476 | AF005422  | Hs.107393 | chloride channel, nucleotide-sensitive, 1A ; chromosome 3 open reading frame 4                    |
| CACYBP    | 211761_s_at | 0.475 | BC005975  | Hs.508524 | calcyclin binding protein ; calcyclin binding protein                                             |
| PRSS12    | 205515_at   | 0.475 | NM_003619 | Hs.445857 | protease, serine, 12 (neurotrypsin, motopsin)                                                     |
| OPRS1     | 201692_at   | 0.474 | NM_005866 | Hs.522087 | opioid receptor, sigma 1                                                                          |
| EPRS      | 200842_s_at | 0.473 | A1475965  | Hs.497788 | glutamyl-prolyl-tRNA synthetase                                                                   |
| LOC137886 | 212934_at   | 0.472 | A1245523  | Hs.155572 | hypothetical protein LOC137886                                                                    |
| SMARCA2   | 206542_s_at | 0.471 | AV725365  | Hs.298990 | SWI/SNF related, matrix associated, actin dependent regulator of chromatin, subfamily a, member 2 |
| PDLIM2    | 219165_at   | 0.469 | NM_021630 | Hs.555972 | PDZ and LIM domain 2 (mystique)                                                                   |
| HHEX      | 204689_at   | 0.469 | NM_001529 | Hs.118651 | hematopoietically expressed homeobox                                                              |
| 6-Sep     | 212414_s_at | 0.468 | D50918    | Hs.387255 | septin 6 ; cytokine-like nuclear factor n-pac                                                     |
| EBP       | 202735_at   | 0.468 | NM_006579 | Hs.522636 | emopamil binding protein (sterol isomerase)                                                       |
| PKP4      | 201927_s_at | 0.467 | BG292559  | Hs.407580 | plakophilin 4                                                                                     |
| MICAL1    | 218376_s_at | 0.467 | NM_022765 | Hs.33476  | microtubule associated monooxygenase, calponin and LIM domain containing 1                        |
| RAB11FIP2 | 203883_s_at | 0.466 | BG249608  | Hs.173656 | RAB11 family interacting protein 2 (class I)                                                      |
| HHEX      | 215933_s_at | 0.464 | Z21533    | Hs.118651 | hematopoietically expressed homeobox                                                              |
| RIMS3     | 204730_at   | 0.461 | NM_014747 | Hs.434924 | regulating synaptic membrane exocytosis 3                                                         |
| HTRA2     | 211152_s_at | 0.46  | AF184911  | Hs.558479 | HtrA serine peptidase 2                                                                           |
| ARHGEF6   | 209539_at   | 0.46  | D25304    | Hs.522795 | Rac/Cdc42 guanine nucleotide exchange factor (GEF) 6                                              |
| CORO1A    | 209083_at   | 0.46  | U34690    | Hs.415067 | coronin, actin binding protein, 1A                                                                |
| GNB5      | 204000_at   | 0.459 | NM_016194 | Hs.155090 | guanine nucleotide binding protein (G protein), beta 5                                            |
| CTBP2     | 210835_s_at | 0.459 | AF222711  | Hs.501345 | C-terminal binding protein 2                                                                      |
| EPRS      | 200843_s_at | 0.458 | NM_004446 | Hs.497788 | glutamyl-prolyl-tRNA synthetase                                                                   |
| SLC19A1   | 211576_s_at | 0.458 | BC003068  | Hs.84190  | solute carrier family 19 (folate transporter), member 1                                           |

|          |             |       |           |           |                                                                                                   |
|----------|-------------|-------|-----------|-----------|---------------------------------------------------------------------------------------------------|
| OSBPL1A  | 208158_s_at | 0.458 | NM_018030 | Hs.370725 | oxysterol binding protein-like 1A ; oxysterol binding protein-like 1A                             |
| FLJ22386 | 218394_at   | 0.457 | NM_024589 | Hs.459795 | leucine zipper domain protein                                                                     |
| MS4A6A   | 219666_at   | 0.456 | NM_022349 | Hs.523702 | membrane-spanning 4-domains, subfamily A, member 6A                                               |
| MS4A4A   | 219607_s_at | 0.453 | NM_024021 | Hs.325960 | membrane-spanning 4-domains, subfamily A, member 4                                                |
| ERCC5    | 202414_at   | 0.453 | NM_000123 | Hs.258429 | excision repair cross-complementing rodent repair deficiency, complementation group 5             |
| DCPS     | 218774_at   | 0.452 | NM_014026 | Hs.504249 | decapping enzyme, scavenger                                                                       |
| MAC30    | 212282_at   | 0.45  | BF038366  | Hs.199695 | hypothetical protein MAC30                                                                        |
| PMS1     | 213677_s_at | 0.45  | BG434893  | Hs.111749 | PMS1 postmeiotic segregation increased 1 (S. cerevisiae)                                          |
| C6orf111 | 212179_at   | 0.448 | AW157501  | Hs.520287 | chromosome 6 open reading frame 111                                                               |
| C21orf59 | 218123_at   | 0.445 | NM_017835 | Hs.5811   | chromosome 21 open reading frame 59                                                               |
| P2RY2    | 206277_at   | 0.445 | NM_002564 | Hs.339    | purinergic receptor P2Y, G-protein coupled, 2                                                     |
| GGA2     | 213772_s_at | 0.445 | BF196572  | Hs.460336 | golgi associated, gamma adaptin ear containing, ARF binding protein 2                             |
| MID1P1   | 218251_at   | 0.444 | NM_021242 | Hs.522605 | MID1 interacting protein 1 (gastrulation specific G12-like (zebrafish))                           |
| VLDLR    | 209822_s_at | 0.444 | L22431    | Hs.370422 | very low density lipoprotein receptor                                                             |
| SMARCA2  | 212257_s_at | 0.444 | AW131754  | Hs.298990 | SWI/SNF related, matrix associated, actin dependent regulator of chromatin, subfamily a, member 2 |
|          | 212764_at   | 0.443 | AI806174  |           |                                                                                                   |
| PRG2     | 220798_x_at | 0.441 | NM_024888 | Hs.546439 | plasticity-related gene 2                                                                         |
| C6orf210 | 219307_at   | 0.441 | NM_020381 | Hs.486095 | chromosome 6 open reading frame 210                                                               |
| KPNB1    | 213803_at   | 0.44  | BG545463  | Hs.532793 | Karyopherin (importin) beta 1                                                                     |
| C14orf87 | 221932_s_at | 0.44  | AA133341  | Hs.532683 | chromosome 14 open reading frame 87                                                               |
| NTE      | 203718_at   | 0.44  | NM_006702 | Hs.511760 | neuropathy target esterase                                                                        |
| ATP2B4   | 212136_at   | 0.44  | AW517686  | Hs.343522 | ATPase, Ca <sup>++</sup> transporting, plasma membrane 4                                          |
| CLGN     | 205830_at   | 0.438 | NM_004362 | Hs.86368  | calmegin                                                                                          |
| ANKRD15  | 213005_s_at | 0.438 | D79994    | Hs.493272 | ankyrin repeat domain 15                                                                          |
| SQLE     | 213562_s_at | 0.437 | BF979497  | Hs.71465  | squalene epoxidase                                                                                |
| TOP2B    | 211987_at   | 0.436 | NM_001068 | Hs.475733 | topoisomerase (DNA) II beta 180kDa                                                                |
| PYCARD   | 221666_s_at | 0.436 | BC004470  | Hs.499094 | PYD and CARD domain containing                                                                    |
| CTBP2    | 201218_at   | 0.435 | N23018    | Hs.501345 | C-terminal binding protein 2                                                                      |
| SPFH1    | 202441_at   | 0.434 | AL568449  | Hs.150087 | SPFH domain family, member 1                                                                      |
| ITPR1    | 216944_s_at | 0.432 | U23850    | Hs.443239 | inositol 1,4,5-triphosphate receptor, type 1                                                      |
| KCNAB2   | 203402_at   | 0.431 | AL520102  | Hs.440497 | potassium voltage-gated channel, shaker-related subfamily, beta member 2                          |
| TCFL5    | 204849_at   | 0.431 | NM_006602 | Hs.30696  | transcription factor-like 5 (basic helix-loop-helix)                                              |
| SCAMP1   | 212416_at   | 0.43  | AV745949  | Hs.482587 | secretory carrier membrane protein 1                                                              |
| PFAS     | 213302_at   | 0.43  | AL044326  | Hs.88139  | phosphoribosylformylglycinamide synthase (FGAR amidotransferase)                                  |
| ZNF238   | 212774_at   | 0.429 | AJ223321  | Hs.69997  | zinc finger protein 238                                                                           |
| ITGA4    | 205885_s_at | 0.429 | L12002    | Hs.555880 | integrin, alpha 4 (antigen CD49D, alpha 4 subunit of VLA-4 receptor)                              |
| WRB      | 202749_at   | 0.426 | NM_004627 | Hs.198308 | tryptophan rich basic protein                                                                     |
| SFXN3    | 217226_s_at | 0.426 | M95929    | Hs.283844 | sideroflexin 3                                                                                    |
| TBC1D5   | 201814_at   | 0.425 | AI300084  | Hs.475629 | TBC1 domain family, member 5                                                                      |

|           |             |       |           |           |                                                                                                   |
|-----------|-------------|-------|-----------|-----------|---------------------------------------------------------------------------------------------------|
| MYB       | 204798_at   | 0.424 | NM_005375 | Hs.531941 | v-myb myeloblastosis viral oncogene homolog (avian)                                               |
| PKP4      | 201929_s_at | 0.424 | NM_003628 | Hs.407580 | plakophilin 4                                                                                     |
| MFNG      | 204153_s_at | 0.423 | NM_002405 | Hs.517603 | manic fringe homolog (Drosophila)                                                                 |
| FLJ11712  | 219056_at   | 0.42  | NM_024570 | Hs.306291 | hypothetical protein FLJ11712                                                                     |
| PRKAR2B   | 203680_at   | 0.419 | NM_002736 | Hs.433068 | protein kinase, cAMP-dependent, regulatory, type II, beta                                         |
| PSIP1     | 209337_at   | 0.419 | AF063020  | Hs.493516 | PC4 and SFRS1 interacting protein 1                                                               |
| SGK3      | 220038_at   | 0.419 | NM_013257 | Hs.380877 | serum/glucocorticoid regulated kinase family, member 3                                            |
| ST14      | 216905_s_at | 0.416 | U20428    | Hs.504315 | suppression of tumorigenicity 14 (colon carcinoma, matriptase, epithin)                           |
| PSAT1     | 220892_s_at | 0.416 | NM_021154 | Hs.494261 | phosphoserine aminotransferase 1                                                                  |
| KIAA0433  | 203253_s_at | 0.416 | NM_015216 | Hs.212046 | KIAA0433 protein                                                                                  |
| ITGA4     | 205884_at   | 0.415 | NM_000885 | Hs.555880 | integrin, alpha 4 (antigen CD49D, alpha 4 subunit of VLA-4 receptor)                              |
| BCL2      | 203685_at   | 0.412 | NM_000633 | Hs.150749 | B-cell CLL/lymphoma 2                                                                             |
| SAMM50    | 201569_s_at | 0.411 | NM_015380 | Hs.505824 | sorting and assembly machinery component 50 homolog (S. cerevisiae)                               |
| CARD9     | 220162_s_at | 0.409 | NM_022352 | Hs.558530 | caspase recruitment domain family, member 9                                                       |
| SPTBN1    | 212071_s_at | 0.407 | BE968833  | Hs.503178 | spectrin, beta, non-erythrocytic 1                                                                |
| TUBA1     | 212242_at   | 0.404 | AL565074  | Hs.75318  | tubulin, alpha 1 (testis specific)                                                                |
| RPL10     | 221989_at   | 0.404 | AW057781  | Hs.401929 | ribosomal protein L10                                                                             |
| RASGRP2   | 214369_s_at | 0.403 | AI688812  | Hs.99491  | RAS guanyl releasing protein 2 (calcium and DAG-regulated)                                        |
| CAT       | 211922_s_at | 0.4   | AY028632  | Hs.502302 | catalase ; catalase                                                                               |
| ASAH1     | 210980_s_at | 0.399 | U47674    | Hs.527412 | N-acylsphingosine amidohydrolase (acid ceramidase) 1                                              |
| GPR18     | 210279_at   | 0.397 | AF261135  | Hs.558333 | G protein-coupled receptor 18                                                                     |
| CXCR4     | 209201_x_at | 0.397 | L01639    | Hs.421986 | chemokine (C-X-C motif) receptor 4                                                                |
| JARID1B   | 201549_x_at | 0.396 | NM_006618 | Hs.443650 | Jumonji, AT rich interactive domain 1B (RBP2-like)                                                |
| SPFH1     | 202444_s_at | 0.395 | NM_006459 | Hs.150087 | SPFH domain family, member 1                                                                      |
| C14orf159 | 218298_s_at | 0.392 | NM_024952 | Hs.309849 | chromosome 14 open reading frame 159                                                              |
| EBP       | 213787_s_at | 0.392 | AV702405  | Hs.522636 | emopamil binding protein (sterol isomerase)                                                       |
| SMARCA2   | 206544_x_at | 0.39  | NM_003070 | Hs.298990 | SWI/SNF related, matrix associated, actin dependent regulator of chromatin, subfamily a, member 2 |
| FLJ11127  | 214947_at   | 0.387 | AF052146  | Hs.155085 | Hypothetical protein FLJ11127                                                                     |
| FLJ10287  | 219130_at   | 0.383 | NM_019083 | Hs.440371 | hypothetical protein FLJ10287                                                                     |
| ASAH1     | 213702_x_at | 0.375 | AI934569  | Hs.527412 | N-acylsphingosine amidohydrolase (acid ceramidase) 1                                              |
| DHRS9     | 219799_s_at | 0.373 | NM_005771 | Hs.179608 | dehydrogenase/reductase (SDR family) member 9                                                     |
| SLC29A1   | 201801_s_at | 0.372 | AF079117  | Hs.25450  | solute carrier family 29 (nucleoside transporters), member 1                                      |
| MRPL33    | 203781_at   | 0.372 | NM_004891 | Hs.515879 | mitochondrial ribosomal protein L33                                                               |
| PDCD4     | 202731_at   | 0.372 | NM_014456 | Hs.232543 | programmed cell death 4 (neoplastic transformation inhibitor)                                     |
| SLC29A1   | 201802_at   | 0.367 | NM_004955 | Hs.25450  | solute carrier family 29 (nucleoside transporters), member 1                                      |
| SFXN3     | 220974_x_at | 0.365 | NM_030971 | Hs.283844 | sideroflexin 3 ; sideroflexin 3                                                                   |
| CXCR4     | 217028_at   | 0.363 | AJ224869  | Hs.421986 | chemokine (C-X-C motif) receptor 4                                                                |
| QPRT      | 204044_at   | 0.363 | NM_014298 | Hs.513484 | quinolinate phosphoribosyltransferase (nicotinate-nucleotide pyrophosphorylase (carboxylating))   |
| TARBP1    | 202813_at   | 0.361 | NM_005646 | Hs.498115 | TAR (HIV) RNA binding protein 1                                                                   |

|           |             |       |           |           |                                                                                                           |
|-----------|-------------|-------|-----------|-----------|-----------------------------------------------------------------------------------------------------------|
| MXI1      | 202364_at   | 0.361 | NM_005962 | Hs.501023 | MAX interactor 1 ; MAX interactor 1                                                                       |
| PSIP1     | 205961_s_at | 0.358 | NM_004682 | Hs.493516 | PC4 and SFRS1 interacting protein 1                                                                       |
| PDCD4     | 202730_s_at | 0.357 | NM_014456 | Hs.232543 | programmed cell death 4 (neoplastic transformation inhibitor)                                             |
| CXCR4     | 211919_s_at | 0.357 | AF348491  | Hs.421986 | chemokine (C-X-C motif) receptor 4 ; chemokine (C-X-C motif) receptor 4                                   |
| HSU79274  | 204521_at   | 0.355 | NM_013300 | Hs.436618 | protein predicted by clone 23733                                                                          |
| COMMD8    | 218351_at   | 0.353 | NM_017845 | Hs.23956  | COMM domain containing 8                                                                                  |
| PRKCA     | 213093_at   | 0.353 | AI471375  | Hs.531704 | protein kinase C, alpha                                                                                   |
| HOMER3    | 204647_at   | 0.351 | NM_004838 | Hs.410683 | homer homolog 3 (Drosophila)                                                                              |
| HA-1      | 212873_at   | 0.35  | BE349017  | Hs.465521 | minor histocompatibility antigen HA-1                                                                     |
| RBL2      | 212331_at   | 0.344 | X76061    | Hs.513609 | retinoblastoma-like 2 (p130)                                                                              |
| EIF4EBP1  | 221539_at   | 0.344 | AB044548  | Hs.411641 | eukaryotic translation initiation factor 4E binding protein 1                                             |
| GM632     | 55872_at    | 0.341 | AI493119  | Hs.551552 | KIAA1196 protein                                                                                          |
| IMPA2     | 203126_at   | 0.336 | NM_014214 | Hs.367992 | inositol(myo)-1(or 4)-monophosphatase 2                                                                   |
| C5orf13   | 201310_s_at | 0.331 | NM_004772 | Hs.483067 | chromosome 5 open reading frame 13                                                                        |
| THY28     | 218491_s_at | 0.331 | NM_014174 | Hs.13645  | thymocyte protein thy28                                                                                   |
| LOC283768 | 213737_x_at | 0.331 | AI620911  | Hs.146211 | hypothetical LOC283768 ; similar to hypothetical protein                                                  |
| PDGFD     | 219304_s_at | 0.329 | NM_025208 | Hs.352298 | platelet derived growth factor D                                                                          |
| SCD       | 200832_s_at | 0.328 | AB032261  | Hs.558396 | stearoyl-CoA desaturase (delta-9-desaturase)                                                              |
| CD1D      | 205789_at   | 0.321 | NM_001766 | Hs.1799   | CD1D antigen, d polypeptide ; CD1D antigen, d polypeptide                                                 |
| C22orf9   | 212421_at   | 0.316 | AB023147  | Hs.369682 | chromosome 22 open reading frame 9                                                                        |
| C22orf9   | 217118_s_at | 0.315 | AK025608  | Hs.369682 | chromosome 22 open reading frame 9                                                                        |
| DIPA      | 204610_s_at | 0.311 | NM_006848 | Hs.66713  | hepatitis delta antigen-interacting protein A                                                             |
| IRF8      | 204057_at   | 0.311 | AI073984  | Hs.137427 | interferon regulatory factor 8 ; interferon regulatory factor 8                                           |
| IDH1      | 201193_at   | 0.308 | NM_005896 | Hs.11223  | isocitrate dehydrogenase 1 (NADP+), soluble                                                               |
| AGTPBP1   | 204500_s_at | 0.305 | NM_015239 | Hs.494321 | ATP/GTP binding protein 1                                                                                 |
| HOMER3    | 215489_x_at | 0.294 | AI871287  | Hs.410683 | homer homolog 3 (Drosophila)                                                                              |
| C20orf103 | 219463_at   | 0.288 | NM_012261 | Hs.22920  | chromosome 20 open reading frame 103                                                                      |
| OBSL1     | 212775_at   | 0.275 | AI978623  | Hs.526594 | obscurin-like 1                                                                                           |
| MS4A3     | 210254_at   | 0.268 | L35848    | Hs.99960  | membrane-spanning 4-domains, subfamily A, member 3 (hematopoietic cell-specific)                          |
| RET       | 211421_s_at | 0.264 | M31213    | Hs.350321 | Ret proto-oncogene (multiple endocrine neoplasia and medullary thyroid carcinoma 1, Hirschsprung disease) |
| PDCD4     | 212593_s_at | 0.223 | N92498    | Hs.232543 | programmed cell death 4 (neoplastic transformation inhibitor)                                             |
