# Supplementary material
Source: Hindawi journal article supplement (doi:10.1155/2011/358717)
Supplement: f2 [file 358717.f2.pdf]

supplementary Table 2. The differentially expressed genes in F3-treated THP-1 cells after 24 hours.

| Gene Symbol | Chip ID     | Fold Change | Genbank   | UniGene   | Description                                                                                                         |
|-------------|-------------|-------------|-----------|-----------|---------------------------------------------------------------------------------------------------------------------|
| CXCL13      | 205242_at   | 339.4       | NM_006419 | Hs.100431 | chemokine (C-X-C motif) ligand 13 (B-cell chemoattractant)                                                          |
| GBP1        | 202269_x_at | 140.9       | BC002666  | Hs.62661  | guanylate binding protein 1, interferon-inducible, 67kDa ; guanylate binding protein 1, interferon-inducible, 67kDa |
| MMP1        | 204475_at   | 118.7       | NM_002421 | Hs.83169  | matrix metalloproteinase 1 (interstitial collagenase)                                                               |
| EBI3        | 219424_at   | 117         | NM_005755 | Hs.501452 | Epstein-Barr virus induced gene 3                                                                                   |
| ISG20       | 204698_at   | 100         | NM_002201 | Hs.459265 | interferon stimulated exonuclease gene 20kDa                                                                        |
| CCL8        | 214038_at   | 99.94       | AI984980  | Hs.271387 | chemokine (C-C motif) ligand 8                                                                                      |
| CCL4        | 204103_at   | 94.93       | NM_002984 | Hs.75703  | chemokine (C-C motif) ligand 4                                                                                      |
| IGFBP3      | 210095_s_at | 79.85       | M31159    | Hs.450230 | insulin-like growth factor binding protein 3                                                                        |
| IGFBP3      | 212143_s_at | 68.37       | BF340228  | Hs.450230 | insulin-like growth factor binding protein 3                                                                        |
| BCL3        | 204908_s_at | 66.55       | NM_005178 | Hs.31210  | B-cell CLL/lymphoma 3                                                                                               |
| CXCL10      | 204533_at   | 62.04       | NM_001565 | Hs.413924 | chemokine (C-X-C motif) ligand 10                                                                                   |
| CCL2        | 216598_s_at | 61.99       | S69738    | Hs.303649 | chemokine (C-C motif) ligand 2                                                                                      |
| TDO2        | 205943_at   | 53.66       | NM_005651 | Hs.183671 | tryptophan 2,3-dioxygenase                                                                                          |
| CXCL11      | 211122_s_at | 51.98       | AF002985  | Hs.518814 | chemokine (C-X-C motif) ligand 11                                                                                   |
| SAT         | 213988_s_at | 50.6        | BE971383  | Hs.28491  | spermidine/spermine N1-acetyltransferase                                                                            |
| TLR7        | 220146_at   | 50.49       | NM_016562 | Hs.443036 | toll-like receptor 7                                                                                                |
| MT1M        | 217546_at   | 49.46       | R06655    | Hs.188518 | metallothionein 1M                                                                                                  |
| SN          | 219519_s_at | 47.06       | NM_023068 | Hs.31869  | Sialoadhesin ; Sialoadhesin                                                                                         |
| IL7R        | 205798_at   | 45.81       | NM_002185 | Hs.362807 | interleukin 7 receptor ; interleukin 7 receptor                                                                     |
| USP18       | 219211_at   | 45.54       | NM_017414 | Hs.38260  | ubiquitin specific peptidase 18                                                                                     |
| ADAMDEC1    | 206134_at   | 42.03       | NM_014479 | Hs.521459 | ADAM-like, decysin 1                                                                                                |
| LAMP3       | 205569_at   | 38.96       | NM_014398 | Hs.518448 | lysosomal-associated membrane protein 3                                                                             |
| IL8         | 202859_x_at | 34.51       | NM_000584 | Hs.624    | interleukin 8                                                                                                       |
| IL8         | 211506_s_at | 33.97       | AF043337  | Hs.624    | interleukin 8                                                                                                       |
| NCF1        | 214084_x_at | 32.46       | AW072388  | Hs.551786 | neutrophil cytosolic factor 1 (47kDa, chronic granulomatous disease, autosomal 1)                                   |
| NCF1        | 204961_s_at | 31.27       | NM_000265 | Hs.551786 | neutrophil cytosolic factor 1 (47kDa, chronic granulomatous disease, autosomal 1)                                   |
| DUSP6       | 208893_s_at | 27.48       | BC005047  | Hs.298654 | dual specificity phosphatase 6                                                                                      |
| SLAMF8      | 219386_s_at | 27.02       | NM_020125 | Hs.438683 | SLAM family member 8                                                                                                |
| IFI44L      | 204439_at   | 25.9        | NM_006820 | Hs.389724 | interferon-induced protein 44-like                                                                                  |
| BCL2A1      | 205681_at   | 25.48       | NM_004049 | Hs.227817 | BCL2-related protein A1                                                                                             |
| MMP9        | 203936_s_at | 24.88       | NM_004994 | Hs.297413 | matrix metalloproteinase 9 (gelatinase B, 92kDa gelatinase, 92kDa type IV collagenase)                              |
| CCL3        | 205114_s_at | 24.8        | NM_002983 | Hs.514107 | chemokine (C-C motif) ligand 3 ; chemokine (C-C motif) ligand 3-like 1 ; chemokine (C-C motif) ligand 3-like 3      |
| LY6E        | 202145_at   | 24.71       | NM_002346 | Hs.521903 | lymphocyte antigen 6 complex, locus E                                                                               |
| IFI27       | 202411_at   | 22.39       | NM_005532 | Hs.532634 | interferon, alpha-inducible protein 27                                                                              |
| GBP1        | 202270_at   | 22.13       | NM_002053 | Hs.62661  | guanylate binding protein 1, interferon-inducible, 67kDa ; guanylate binding protein 1, interferon-inducible, 67kDa |
| IFIT1       | 203153_at   | 21.51       | NM_001548 | Hs.20315  | interferon-induced protein with tetratricopeptide repeats 1                                                         |
| SLAMF7      | 219159_s_at | 20.52       | NM_021181 | Hs.517265 | SLAM family member 7                                                                                                |
| IL15RA      | 207375_s_at | 19.62       | NM_002189 | Hs.524117 | interleukin 15 receptor, alpha                                                                                      |
| CXCL11      | 210163_at   | 19.01       | AF030514  | Hs.518814 | chemokine (C-X-C motif) ligand 11                                                                                   |

|          |             |       |           |           |                                                                                                               |
|----------|-------------|-------|-----------|-----------|---------------------------------------------------------------------------------------------------------------|
| RSAD2    | 213797_at   | 18.84 | AI337069  | Hs.17518  | radical S-adenosyl methionine domain containing 2                                                             |
| MSC      | 209928_s_at | 18.42 | AF060154  | Hs.442619 | musculin (activated B-cell factor-1)                                                                          |
| IL1B     | 205067_at   | 18.35 | NM_000576 | Hs.126256 | interleukin 1, beta                                                                                           |
| CXCL1    | 204470_at   | 18.22 | NM_001511 | Hs.789    | chemokine (C-X-C motif) ligand 1 (melanoma growth stimulating activity, alpha)                                |
| SOD2     | 215223_s_at | 17.95 | W46388    | Hs.487046 | superoxide dismutase 2, mitochondrial                                                                         |
| ICAM1    | 202638_s_at | 17.55 | NM_000201 | Hs.515126 | intercellular adhesion molecule 1 (CD54), human rhinovirus receptor                                           |
| HESX1    | 211267_at   | 17.34 | U82811    | Hs.171980 | homeo box (expressed in ES cells) 1                                                                           |
| HERC6    | 219352_at   | 17.31 | NM_017912 | Hs.529317 | hect domain and RLD 6                                                                                         |
| MX1      | 202086_at   | 16.32 | NM_002462 | Hs.517307 | myxovirus (influenza virus) resistance 1, interferon-inducible protein p78 (mouse)                            |
| LOC51334 | 220014_at   | 16.23 | NM_016644 | Hs.157461 | mesenchymal stem cell protein DSC54                                                                           |
| ISG20    | 33304_at    | 15.85 | U88964    | Hs.459265 | interferon stimulated exonuclease gene 20kDa                                                                  |
| TNFAIP6  | 206025_s_at | 15.64 | AW188198  | Hs.437322 | tumor necrosis factor, alpha-induced protein 6                                                                |
| OAS1     | 205552_s_at | 15.53 | NM_002534 | Hs.524760 | 2',5'-oligoadenylate synthetase 1, 40/46kDa                                                                   |
| TNFAIP6  | 206026_s_at | 14.74 | NM_007115 | Hs.437322 | tumor necrosis factor, alpha-induced protein 6                                                                |
| IFI44    | 214453_s_at | 14.73 | NM_006417 | Hs.82316  | interferon-induced protein 44                                                                                 |
| IFITM1   | 201601_x_at | 14.45 | NM_003641 | Hs.458414 | interferon induced transmembrane protein 1 (9-27)                                                             |
| MAFB     | 218559_s_at | 14.19 | NM_005461 | Hs.169487 | v-maf musculoaponeurotic fibrosarcoma oncogene homolog B (avian)                                              |
| TNFSF10  | 202687_s_at | 14.04 | U57059    | Hs.478275 | tumor necrosis factor (ligand) superfamily, member 10 ; tumor necrosis factor (ligand) superfamily, member 10 |
| IL1B     | 39402_at    | 13.72 | M15330    | Hs.126256 | interleukin 1, beta                                                                                           |
| STAT1    | 209969_s_at | 13.57 | BC002704  | Hs.470943 | signal transducer and activator of transcription 1, 91kDa                                                     |
| SGK      | 201739_at   | 13.46 | NM_005627 | Hs.296323 | serum/glucocorticoid regulated kinase                                                                         |
| BIRC3    | 210538_s_at | 13.19 | U37546    | Hs.127799 | baculoviral IAP repeat-containing 3                                                                           |
| CD14     | 201743_at   | 12.82 | NM_000591 | Hs.163867 | CD14 antigen ; CD14 antigen                                                                                   |
| IFIT3    | 204747_at   | 12.46 | NM_001549 | Hs.47338  | interferon-induced protein with tetratricopeptide repeats 3                                                   |
| IRF7     | 208436_s_at | 11.9  | NM_004030 | Hs.166120 | interferon regulatory factor 7                                                                                |
| SOD2     | 216841_s_at | 11.22 | X15132    | Hs.487046 | superoxide dismutase 2, mitochondrial                                                                         |
| ZFP36L1  | 211962_s_at | 11.02 | BG250310  | Hs.85155  | zinc finger protein 36, C3H type-like 1                                                                       |
| G1P2     | 205483_s_at | 10.99 | NM_005101 | Hs.458485 | interferon, alpha-inducible protein (clone IFI-15K)                                                           |
| IFI16    | 208965_s_at | 10.77 | BG256677  | Hs.380250 | interferon, gamma-inducible protein 16                                                                        |
| MGC4504  | 219270_at   | 10.7  | NM_024111 | Hs.155569 | hypothetical protein MGC4504                                                                                  |
| FEZ1     | 203562_at   | 10.57 | NM_005103 | Hs.224008 | fasciculation and elongation protein zeta 1 (zygin I)                                                         |
| CASP10   | 205467_at   | 10.55 | NM_001230 | Hs.5353   | caspase 10, apoptosis-related cysteine peptidase                                                              |
| IL1RN    | 212657_s_at | 10.47 | U65590    | Hs.81134  | interleukin 1 receptor antagonist                                                                             |
| IFI16    | 208966_x_at | 10.22 | AF208043  | Hs.380250 | interferon, gamma-inducible protein 16                                                                        |
| ENPP2    | 209392_at   | 10.13 | L35594    | Hs.190977 | ectonucleotide pyrophosphatase/phosphodiesterase 2 (autotaxin)                                                |
| OAS1     | 202869_at   | 10.08 | NM_016816 | Hs.524760 | 2',5'-oligoadenylate synthetase 1, 40/46kDa                                                                   |
| S100A12  | 205863_at   | 9.992 | NM_005621 | Hs.19413  | S100 calcium binding protein A12 (calgranulin C) ; S100 calcium binding protein A12 (calgranulin C)           |
| IFIT5    | 203595_s_at | 9.986 | N47725    | Hs.252839 | interferon-induced protein with tetratricopeptide repeats 5                                                   |
| MX2      | 204994_at   | 9.787 | NM_002463 | Hs.926    | myxovirus (influenza virus) resistance 2 (mouse)                                                              |
| OAS2     | 204972_at   | 9.66  | NM_016817 | Hs.414332 | 2'-5'-oligoadenylate synthetase 2, 69/71kDa                                                                   |
| ICAM1    | 202637_s_at | 9.643 | A1608725  | Hs.515126 | intercellular adhesion molecule 1 (CD54), human rhinovirus receptor                                           |
| SLC2A6   | 220091_at   | 9.567 | NM_017585 | Hs.244378 | solute carrier family 2 (facilitated glucose transporter), member 6                                           |

|              |             |       |            |           |                                                                                                               |
|--------------|-------------|-------|------------|-----------|---------------------------------------------------------------------------------------------------------------|
| TNFSF10      | 214329_x_at | 9.467 | AW474434   | Hs.478275 | Tumor necrosis factor (ligand) superfamily, member 10 ; Tumor necrosis factor (ligand) superfamily, member 10 |
| OASL         | 210797_s_at | 9.312 | AF063612   | Hs.118633 | 2'-5'-oligoadenylate synthetase-like                                                                          |
| TNFSF10      | 202688_at   | 9.277 | NM_003810  | Hs.478275 | tumor necrosis factor (ligand) superfamily, member 10 ; tumor necrosis factor (ligand) superfamily, member 10 |
| IFITM1       | 214022_s_at | 9.265 | AA749101   | Hs.458414 | interferon induced transmembrane protein 1 (9-27)                                                             |
| DDX58        | 218943_s_at | 9.176 | NM_014314  | Hs.190622 | DEAD (Asp-Glu-Ala-Asp) box polypeptide 58                                                                     |
| OAS3         | 218400_at   | 9.105 | NM_006187  | Hs.528634 | 2'-5'-oligoadenylate synthetase 3, 100kDa                                                                     |
| MMP14        | 217279_x_at | 9.066 | X83535     | Hs.2399   | matrix metalloproteinase 14 (membrane-inserted)                                                               |
| BRDG1        | 220059_at   | 8.89  | NM_012108  | Hs.435579 | BCR downstream signaling 1                                                                                    |
| IFIH1        | 219209_at   | 8.735 | NM_022168  | Hs.163173 | interferon induced with helicase C domain 1                                                                   |
| IFIT2        | 217502_at   | 8.732 | BE888744   | Hs.437609 | interferon-induced protein with tetratricopeptide repeats 2                                                   |
| TRIM22       | 213293_s_at | 8.33  | AA083478   | Hs.501778 | tripartite motif-containing 22                                                                                |
| CXCL2        | 209774_x_at | 8.066 | M57731     | Hs.75765  | chemokine (C-X-C motif) ligand 2                                                                              |
| TAP1         | 202307_s_at | 8.028 | NM_000593  | Hs.352018 | transporter 1, ATP-binding cassette, sub-family B (MDR/TAP)                                                   |
| IFI16        | 206332_s_at | 7.894 | NM_005531  | Hs.380250 | interferon, gamma-inducible protein 16                                                                        |
| LOC391020    | 216565_x_at | 7.893 | AL121994   |           | similar to Interferon-induced transmembrane protein 3 (Interferon-inducible protein 1-8U)                     |
| CXCL6        | 206336_at   | 7.825 | NM_002993  | Hs.164021 | chemokine (C-X-C motif) ligand 6 (granulocyte chemotactic protein 2)                                          |
| MGC5618      | 221477_s_at | 7.616 | BF575213   |           | hypothetical protein MGC5618                                                                                  |
| PSCDBP       | 209606_at   | 7.615 | L06633     | Hs.270    | pleckstrin homology, Sec7 and coiled-coil domains, binding protein                                            |
| CCL7         | 208075_s_at | 7.564 | NM_006273  | Hs.251526 | chemokine (C-C motif) ligand 7 ; chemokine (C-C motif) ligand 7                                               |
| IL1RN        | 212659_s_at | 7.483 | AW083357   | Hs.81134  | interleukin 1 receptor antagonist                                                                             |
| BCL6         | 203140_at   | 7.406 | NM_001706  | Hs.478588 | B-cell CLL/lymphoma 6 (zinc finger protein 51) ; B-cell CLL/lymphoma 6 (zinc finger protein 51)               |
| OASL         | 205660_at   | 7.38  | NM_003733  | Hs.118633 | 2'-5'-oligoadenylate synthetase-like                                                                          |
| STAT1        | AFFX-HUMIS7 | 7.307 | AFFX-HUMIS | Hs.470943 | signal transducer and activator of transcription 1, 91kDa                                                     |
| SAMD9        | 219691_at   | 7.22  | NM_017654  | Hs.65641  | sterile alpha motif domain containing 9                                                                       |
| SP110        | 208392_x_at | 7.021 | NM_004510  | Hs.145150 | SP110 nuclear body protein                                                                                    |
| STAT1        | AFFX-HUMIS6 | 6.967 | AFFX-HUMIS | Hs.470943 | signal transducer and activator of transcription 1, 91kDa                                                     |
| RRBP1        | 201206_s_at | 6.933 | NM_004587  | Hs.472213 | ribosome binding protein 1 homolog 180kDa (dog)                                                               |
| SLAMF8       | 219385_at   | 6.907 | NM_020125  | Hs.438683 | SLAM family member 8                                                                                          |
| PDGFRL       | 205226_at   | 6.847 | NM_006207  | Hs.458573 | platelet-derived growth factor receptor-like                                                                  |
| DUSP6        | 208891_at   | 6.83  | BC003143   | Hs.298654 | dual specificity phosphatase 6                                                                                |
| SAT          | 210592_s_at | 6.769 | M55580     | Hs.28491  | spermidine/spermine N1-acetyltransferase                                                                      |
| EPB41L3      | 212681_at   | 6.765 | A1770004   | Hs.213394 | erythrocyte membrane protein band 4.1-like 3                                                                  |
| IFI35        | 209417_s_at | 6.704 | BC001356   | Hs.50842  | interferon-induced protein 35                                                                                 |
| UBE2L6       | 201649_at   | 6.605 | NM_004223  | Hs.425777 | ubiquitin-conjugating enzyme E2L 6                                                                            |
| EPB41L3      | 206710_s_at | 6.525 | NM_012307  | Hs.213394 | erythrocyte membrane protein band 4.1-like 3                                                                  |
| HSD11B1      | 205404_at   | 6.52  | NM_005525  | Hs.195040 | hydroxysteroid (11-beta) dehydrogenase 1                                                                      |
| HMOX1        | 203665_at   | 6.444 | NM_002133  | Hs.517581 | heme oxygenase (decycling) 1                                                                                  |
| GALNAC4S-6ST | 203066_at   | 6.41  | NM_014863  | Hs.287537 | B cell RAG associated protein                                                                                 |
| C3AR1        | 209906_at   | 6.405 | U62027     | Hs.527839 | complement component 3a receptor 1                                                                            |
| CCL5         | 1405_i_at   | 6.388 | M21121     | Hs.514821 | chemokine (C-C motif) ligand 5                                                                                |
| TRIM34       | 221044_s_at | 6.294 | NM_021616  | Hs.125300 | tripartite motif-containing 34 ; tripartite motif-containing 6 and tripartite motif-containing 34             |
| CTSL         | 202087_s_at | 6.287 | NM_001912  | Hs.418123 | cathepsin L                                                                                                   |

|          |             |       |            |           |                                                                                                       |
|----------|-------------|-------|------------|-----------|-------------------------------------------------------------------------------------------------------|
| CCL5     | 204655_at   | 6.236 | NM_002985  | Hs.514821 | chemokine (C-C motif) ligand 5 ; chemokine (C-C motif) ligand 5                                       |
| NFKBIA   | 201502_s_at | 6.184 | AI078167   | Hs.81328  | nuclear factor of kappa light polypeptide gene enhancer in B-cells inhibitor, alpha                   |
| APOBEC3A | 210873_x_at | 6.171 | U03891     | Hs.348983 | apolipoprotein B mRNA editing enzyme, catalytic polypeptide-like 3A                                   |
| IL1RN    | 216243_s_at | 6.148 | BE563442   | Hs.81134  | interleukin 1 receptor antagonist                                                                     |
| MAFF     | 36711_at    | 6.09  | AL021977   | Hs.517617 | v-maf musculoaponeurotic fibrosarcoma oncogene homolog F (avian)                                      |
| STAT1    | AFFX-HUMIS1 | 6.05  | AFFX-HUMIS | Hs.470943 | signal transducer and activator of transcription 1, 91kDa                                             |
| PEL1     | 218319_at   | 6.035 | NM_020651  | Hs.7886   | pellino homolog 1 (Drosophila)                                                                        |
| HERC5    | 219863_at   | 5.953 | NM_016323  | Hs.26663  | hect domain and RLD 5                                                                                 |
| FXYP6    | 217897_at   | 5.931 | NM_022003  | Hs.504031 | FXYP domain containing ion transport regulator 6                                                      |
| TNF      | 207113_s_at | 5.916 | NM_000594  | Hs.241570 | tumor necrosis factor (TNF superfamily, member 2)                                                     |
| GCH1     | 204224_s_at | 5.764 | NM_000161  | Hs.86724  | GTP cyclohydrolase 1 (dopa-responsive dystonia)                                                       |
| CD163    | 215049_x_at | 5.659 | Z22969     | Hs.504641 | CD163 antigen                                                                                         |
| ZFP36L1  | 211965_at   | 5.651 | BE620915   | Hs.85155  | zinc finger protein 36, C3H type-like 1                                                               |
| SRD5A1   | 204675_at   | 5.601 | NM_001047  | Hs.552    | steroid-5-alpha-reductase, alpha polypeptide 1 (3-oxo-5 alpha-steroid delta 4-dehydrogenase alpha 1)  |
| BCL3     | 204907_s_at | 5.567 | AI829875   | Hs.31210  | B-cell CLL/lymphoma 3                                                                                 |
| ZC3H12A  | 218810_at   | 5.524 | NM_025079  | Hs.471918 | zinc finger CCCCH-type containing 12A                                                                 |
| CD163    | 203645_s_at | 5.522 | NM_004244  | Hs.504641 | CD163 antigen                                                                                         |
| TNFAIP3  | 202644_s_at | 5.489 | NM_006290  | Hs.211600 | tumor necrosis factor, alpha-induced protein 3                                                        |
| SERPINA1 | 211429_s_at | 5.456 | AF119873   | Hs.525557 | serpin peptidase inhibitor, clade A (alpha-1 antiproteinase, antitrypsin), member 1                   |
| GBP2     | 202748_at   | 5.447 | NM_004120  | Hs.386567 | guanylate binding protein 2, interferon-inducible ; guanylate binding protein 2, interferon-inducible |
| KYNU     | 217388_s_at | 5.435 | D55639     | Hs.470126 | kynureninase (L-kynurenine hydrolase)                                                                 |
| TNFRSF9  | 207536_s_at | 5.409 | NM_001561  | Hs.193418 | tumor necrosis factor receptor superfamily, member 9                                                  |
| FLJ11286 | 53720_at    | 5.398 | AI862559   | Hs.175120 | hypothetical protein FLJ11286                                                                         |
| TNFAIP3  | 202643_s_at | 5.384 | AI738896   | Hs.211600 | tumor necrosis factor, alpha-induced protein 3                                                        |
| OAS2     | 206553_at   | 5.366 | NM_002535  | Hs.414332 | 2'-5'-oligoadenylate synthetase 2, 69/71kDa                                                           |
| PPP1R15A | 202014_at   | 5.302 | NM_014330  | Hs.76556  | protein phosphatase 1, regulatory (inhibitor) subunit 15A                                             |
| NQO1     | 201467_s_at | 5.266 | AI039874   | Hs.406515 | NAD(P)H dehydrogenase, quinone 1                                                                      |
| SPI10    | 209762_x_at | 5.259 | AF280094   | Hs.145150 | SP110 nuclear body protein                                                                            |
| RND3     | 212724_at   | 5.258 | BG054844   | Hs.6838   | Rho family GTPase 3                                                                                   |
| LILRB2   | 207697_x_at | 5.182 | NM_005874  | Hs.534386 | leukocyte immunoglobulin-like receptor, subfamily B (with TM and ITIM domains), member 2              |
| IL10RA   | 204912_at   | 5.174 | NM_001558  | Hs.504035 | interleukin 10 receptor, alpha                                                                        |
| LILRB2   | 210146_x_at | 5.164 | AF004231   | Hs.534386 | leukocyte immunoglobulin-like receptor, subfamily B (with TM and ITIM domains), member 2              |
| PLSCR1   | 202446_s_at | 5.125 | AI825926   | Hs.130759 | phospholipid scramblase 1                                                                             |
| AHR      | 202820_at   | 5.125 | NM_001621  | Hs.171189 | aryl hydrocarbon receptor                                                                             |
| FCAR     | 207674_at   | 5.001 | NM_002000  | Hs.193122 | Fc fragment of IgA, receptor for                                                                      |
| PLAUR    | 211924_s_at | 4.93  | AY029180   | Hs.466871 | plasminogen activator, urokinase receptor ; plasminogen activator, urokinase receptor                 |
| RGL1     | 209568_s_at | 4.925 | AF186779   | Hs.497148 | ral guanine nucleotide dissociation stimulator-like 1                                                 |
| BTG2     | 201236_s_at | 4.882 | NM_006763  | Hs.519162 | BTG family, member 2                                                                                  |
| EHD1     | 209038_s_at | 4.84  | AL579035   | Hs.523774 | EH-domain containing 1                                                                                |
| EHBPI1   | 221755_at   | 4.838 | BG334196   | Hs.502867 | EH domain binding protein 1-like 1                                                                    |
| SAT      | 203455_s_at | 4.83  | NM_002970  | Hs.28491  | spermidine/spermine N1-acetyltransferase                                                              |
| PIM1     | 209193_at   | 4.83  | M24779     | Hs.81170  | pim-1 oncogene ; pim-1 oncogene                                                                       |

|           |             |       |           |           |                                                                                                      |
|-----------|-------------|-------|-----------|-----------|------------------------------------------------------------------------------------------------------|
| SN        | 44673_at    | 4.808 | N53555    | Hs.31869  | Sialoadhesin                                                                                         |
| SERPINE2  | 212190_at   | 4.797 | AL541302  | Hs.38449  | serpin peptidase inhibitor, clade E (nexin, plasminogen activator inhibitor type 1), member 2        |
| CD83      | 204440_at   | 4.79  | NM_004233 | Hs.484703 | CD83 antigen (activated B lymphocytes, immunoglobulin superfamily)                                   |
| SP110     | 208012_x_at | 4.786 | NM_004509 | Hs.145150 | SP110 nuclear body protein                                                                           |
| SPHK1     | 219257_s_at | 4.746 | NM_021972 | Hs.68061  | sphingosine kinase 1                                                                                 |
| SP110     | 209761_s_at | 4.743 | AA969194  | Hs.145150 | SP110 nuclear body protein                                                                           |
| MARCKS    | 201670_s_at | 4.663 | M68956    | Hs.519909 | myristoylated alanine-rich protein kinase C substrate                                                |
| IER3      | 201631_s_at | 4.658 | NM_003897 | Hs.76095  | immediate early response 3                                                                           |
| PLSCR1    | 202430_s_at | 4.633 | NM_021105 | Hs.130759 | phospholipid scramblase 1                                                                            |
| MARCKS    | 201668_x_at | 4.619 | AW163148  | Hs.519909 | myristoylated alanine-rich protein kinase C substrate                                                |
| AIM2      | 206513_at   | 4.587 | NM_004833 | Hs.281898 | absent in melanoma 2                                                                                 |
| LPXN      | 216250_s_at | 4.543 | X77598    | Hs.125474 | leupaxin                                                                                             |
| EHD1      | 209037_s_at | 4.542 | AW182860  | Hs.523774 | EH-domain containing 1                                                                               |
| CYBB      | 203922_s_at | 4.48  | AI308863  | Hs.292356 | cytochrome b-245, beta polypeptide (chronic granulomatous disease)                                   |
| FTH1      | 214211_at   | 4.476 | AA083483  | Hs.558804 | ferritin, heavy polypeptide 1                                                                        |
| ENPP2     | 210839_s_at | 4.475 | D45421    | Hs.190977 | ectonucleotide pyrophosphatase/phosphodiesterase 2 (autotaxin)                                       |
| DUSP6     | 208892_s_at | 4.451 | BC003143  | Hs.298654 | dual specificity phosphatase 6                                                                       |
| PDE4B     | 203708_at   | 4.448 | NM_002600 | Hs.198072 | phosphodiesterase 4B, cAMP-specific (phosphodiesterase E4 dunce homolog, Drosophila)                 |
| WARS      | 200629_at   | 4.437 | NM_004184 | Hs.497599 | tryptophanyl-tRNA synthetase                                                                         |
| TRAF1     | 205599_at   | 4.43  | NM_005658 | Hs.531251 | TNF receptor-associated factor 1                                                                     |
| KMO       | 205306_x_at | 4.42  | AI074145  |           | kynurenine 3-monooxygenase (kynurenine 3-hydroxylase)                                                |
| ATF5      | 204999_s_at | 4.417 | BC005174  | Hs.9754   | activating transcription factor 5                                                                    |
| HIST2H2AA | 214290_s_at | 4.403 | AI313324  | Hs.530461 | histone 2, H2aa                                                                                      |
| BTG2      | 201235_s_at | 4.395 | BG339064  | Hs.519162 | BTG family, member 2                                                                                 |
| IFITM3    | 212203_x_at | 4.391 | BF338947  | Hs.374650 | interferon induced transmembrane protein 3 (1-8U)                                                    |
| CKIP-1    | 218223_s_at | 4.388 | NM_016274 | Hs.438824 | CK2 interacting protein 1; HQ0024c protein                                                           |
| HCK       | 208018_s_at | 4.387 | NM_002110 | Hs.126521 | hemopoietic cell kinase                                                                              |
| CHST2     | 203921_at   | 4.378 | NM_004267 | Hs.8786   | carbohydrate (N-acetylglucosamine-6-O) sulfotransferase 2                                            |
| SART2     | 218854_at   | 4.366 | NM_013352 | Hs.486292 | squamous cell carcinoma antigen recognized by T cells 2                                              |
| INDO      | 210029_at   | 4.298 | M34455    | Hs.840    | indoleamine-pyrrole 2,3 dioxygenase                                                                  |
| FLJ11259  | 218627_at   | 4.249 | NM_018370 | Hs.525634 | hypothetical protein FLJ11259                                                                        |
| KMO       | 211138_s_at | 4.204 | BC005297  |           | kynurenine 3-monooxygenase (kynurenine 3-hydroxylase)                                                |
| EMR2      | 207610_s_at | 4.199 | NM_013447 | Hs.531619 | egf-like module containing, mucin-like, hormone receptor-like 2                                      |
| SERPINA1  | 202833_s_at | 4.199 | NM_000295 | Hs.525557 | serpin peptidase inhibitor, clade A (alpha-1 antiproteinase, antitrypsin), member 1                  |
| DOCK4     | 205003_at   | 4.123 | NM_014705 | Hs.118140 | dedicator of cytokinesis 4                                                                           |
| PARP12    | 218543_s_at | 4.116 | NM_022750 | Hs.12646  | poly (ADP-ribose) polymerase family, member 12                                                       |
| PLA2G7    | 206214_at   | 4.113 | NM_005084 | Hs.554780 | phospholipase A2, group VII (platelet-activating factor acetylhydrolase, plasma)                     |
| APOL6     | 219716_at   | 4.101 | NM_030641 | Hs.257352 | apolipoprotein L, 6                                                                                  |
| IFRG28    | 219684_at   | 4.077 | NM_022147 | Hs.43388  | 28kD interferon responsive protein                                                                   |
| SRD5A1    | 210959_s_at | 4.059 | AF113128  | Hs.552    | steroid-5-alpha-reductase, alpha polypeptide 1 (3-oxo-5 alpha-steroid delta 4-dehydrogenase alpha 1) |
| IGSF4     | 209031_at   | 4.034 | AL519710  | Hs.370510 | Immunoglobulin superfamily, member 4                                                                 |
| PLA2G4C   | 209785_s_at | 4.02  | AF065214  | Hs.18858  | phospholipase A2, group IVC (cytosolic, calcium-independent)                                         |

|          |             |       |           |           |                                                                                             |
|----------|-------------|-------|-----------|-----------|---------------------------------------------------------------------------------------------|
| LY96     | 206584_at   | 4.018 | NM_015364 | Hs.69328  | lymphocyte antigen 96                                                                       |
| FAS      | 215719_x_at | 4.003 | X83493    | Hs.244139 | Fas (TNF receptor superfamily, member 6)                                                    |
| VCAM1    | 203868_s_at | 3.996 | NM_001078 | Hs.109225 | vascular cell adhesion molecule 1                                                           |
| ALOX5AP  | 204174_at   | 3.99  | NM_001629 | Hs.507658 | arachidonate 5-lipoxygenase-activating protein                                              |
| MMP14    | 202827_s_at | 3.987 | AU149305  | Hs.2399   | matrix metalloproteinase 14 (membrane-inserted)                                             |
| GAS7     | 207704_s_at | 3.965 | NM_003644 | Hs.462214 | growth arrest-specific 7                                                                    |
| PDGFA    | 205463_s_at | 3.956 | NM_002607 | Hs.376032 | platelet-derived growth factor alpha polypeptide                                            |
| DDIT4    | 202887_s_at | 3.948 | NM_019058 | Hs.523012 | DNA-damage-inducible transcript 4                                                           |
| LYN      | 202626_s_at | 3.947 | NM_002350 | Hs.491767 | v-src-1 Yamaguchi sarcoma viral related oncogene homolog                                    |
| MARCKS   | 201669_s_at | 3.932 | NM_002356 | Hs.519909 | myristoylated alanine-rich protein kinase C substrate                                       |
| RTN1     | 210222_s_at | 3.922 | BC000314  | Hs.368626 | reticulon 1                                                                                 |
| KYNU     | 210663_s_at | 3.911 | BC000879  | Hs.470126 | kynureninase (L-kynurenine hydrolase)                                                       |
| GPR35    | 210264_at   | 3.892 | AF089087  | Hs.239891 | G protein-coupled receptor 35                                                               |
| ATF5     | 204998_s_at | 3.89  | NM_012068 | Hs.9754   | activating transcription factor 5                                                           |
| BIRC4BP  | 206133_at   | 3.887 | NM_017523 | Hs.441975 | XIAP associated factor-1                                                                    |
| CDKN1A   | 202284_s_at | 3.887 | NM_000389 | Hs.370771 | cyclin-dependent kinase inhibitor 1A (p21, Cip1)                                            |
| OPTN     | 202074_s_at | 3.886 | NM_021980 | Hs.332706 | optineurin                                                                                  |
| RAPGEF1  | 204543_at   | 3.875 | NM_005312 | Hs.127897 | Rap guanine nucleotide exchange factor (GEF) 1                                              |
| TFAP2A   | 204653_at   | 3.826 | BF343007  | Hs.519880 | transcription factor AP-2 alpha (activating enhancer binding protein 2 alpha)               |
| GEM      | 204472_at   | 3.813 | NM_005261 | Hs.345139 | GTP binding protein overexpressed in skeletal muscle                                        |
| IBRDC3   | 36564_at    | 3.797 | W27419    | Hs.546478 | IBR domain containing 3                                                                     |
| FLJ20035 | 218986_s_at | 3.787 | NM_017631 | Hs.481141 | hypothetical protein FLJ20035                                                               |
| ECCGF1   | 204858_s_at | 3.776 | NM_001953 | Hs.546251 | endothelial cell growth factor 1 (platelet-derived)                                         |
| KCNJ2    | 206765_at   | 3.775 | AF153820  | Hs.1547   | potassium inwardly-rectifying channel, subfamily J, member 2                                |
| LYN      | 210754_s_at | 3.761 | M79321    | Hs.491767 | v-src-1 Yamaguchi sarcoma viral related oncogene homolog                                    |
| IL6      | 205207_at   | 3.759 | NM_000600 | Hs.512234 | interleukin 6 (interferon, beta 2)                                                          |
| IGSF4    | 209030_s_at | 3.752 | NM_014333 | Hs.370510 | immunoglobulin superfamily, member 4                                                        |
| CD40     | 215346_at   | 3.74  | BF664114  | Hs.472860 | CD40 antigen (TNF receptor superfamily member 5)                                            |
| EHD1     | 222221_x_at | 3.734 | AY007161  | Hs.523774 | EH-domain containing 1                                                                      |
| C5R1     | 220088_at   | 3.729 | NM_001736 | Hs.2161   | complement component 5 receptor 1 (C5a ligand)                                              |
| ME1      | 204059_s_at | 3.725 | NM_002395 | Hs.21160  | malic enzyme 1, NADP(+)-dependent, cytosolic                                                |
| PBEF1    | 217739_s_at | 3.724 | NM_005746 | Hs.489615 | pre-B-cell colony enhancing factor 1                                                        |
| VEGF     | 211527_x_at | 3.71  | M27281    | Hs.73793  | vascular endothelial growth factor                                                          |
| G1P3     | 204415_at   | 3.689 | NM_022873 | Hs.523847 | interferon, alpha-inducible protein (clone IFI-6-16)                                        |
| PTAFR    | 211661_x_at | 3.66  | M80436    | Hs.46     | platelet-activating factor receptor ; platelet-activating factor receptor                   |
| ALAS1    | 205633_s_at | 3.654 | NM_000688 | Hs.476308 | aminolevulinic acid synthase 1                                                              |
| SLC31A1  | 203971_at   | 3.651 | NM_001859 | Hs.532315 | solute carrier family 31 (copper transporters), member 1                                    |
| P2RY5    | 218589_at   | 3.65  | NM_005767 | Hs.123464 | purinergic receptor P2Y, G-protein coupled, 5                                               |
| OLIG2    | 213825_at   | 3.64  | AA757419  | Hs.176977 | oligodendrocyte lineage transcription factor 2                                              |
| PSMB9    | 204279_at   | 3.629 | NM_002800 | Hs.381081 | proteasome (prosome, macropain) subunit, beta type, 9 (large multifunctional peptidase 2)   |
| EPB41L3  | 211776_s_at | 3.627 | BC006141  | Hs.213394 | erythrocyte membrane protein band 4.1-like 3 ; erythrocyte membrane protein band 4.1-like 3 |
| CSPG2    | 204619_s_at | 3.618 | BF590263  | Hs.443681 | chondroitin sulfate proteoglycan 2 (versican)                                               |

|          |             |       |            |           |                                                                                      |
|----------|-------------|-------|------------|-----------|--------------------------------------------------------------------------------------|
| ACSL1    | 207275_s_at | 3.611 | NM_001995  | Hs.406678 | acyl-CoA synthetase long-chain family member 1                                       |
| NFKB2    | 207535_s_at | 3.604 | NM_002502  | Hs.73090  | nuclear factor of kappa light polypeptide gene enhancer in B-cells 2 (p49/p100)      |
| CTSS     | 202902_s_at | 3.59  | NM_004079  | Hs.181301 | cathepsin S                                                                          |
| NKG7     | 213915_at   | 3.588 | NM_005601  | Hs.10306  | natural killer cell group 7 sequence                                                 |
| SAMSN1   | 220330_s_at | 3.576 | NM_022136  | Hs.473341 | SAM domain, SH3 domain and nuclear localisation signals, 1                           |
| STAT1    | AFFX-HUMIS1 | 3.554 | AFFX-HUMIS | Hs.470943 | signal transducer and activator of transcription 1, 91kDa                            |
| LYN      | 202625_at   | 3.533 | AI356412   | Hs.491767 | v-yes-1 Yamaguchi sarcoma viral related oncogene homolog                             |
| INHBE    | 210587_at   | 3.52  | BC005161   | Hs.279497 | inhibin, beta E                                                                      |
| APOL1    | 209546_s_at | 3.477 | AF323540   | Hs.114309 | apolipoprotein L, 1                                                                  |
| CTSH     | 202295_s_at | 3.46  | NM_004390  | Hs.148641 | cathepsin H                                                                          |
| VEGF     | 212171_x_at | 3.429 | H95344     | Hs.73793  | vascular endothelial growth factor                                                   |
| G0S2     | 213524_s_at | 3.414 | NM_015714  | Hs.432132 | G0/G1switch 2                                                                        |
| KYNU     | 204385_at   | 3.413 | NM_003937  | Hs.470126 | kynureninase (L-kynurenine hydrolase)                                                |
| CASP1    | 206011_at   | 3.4   | AI719655   | Hs.2490   | caspace 1, apoptosis-related cysteine peptidase (interleukin 1, beta, convertase)    |
| TNFRSF1B | 203508_at   | 3.397 | NM_001066  | Hs.256278 | tumor necrosis factor receptor superfamily, member 1B                                |
| STAT1    | 200887_s_at | 3.354 | NM_007315  | Hs.470943 | signal transducer and activator of transcription 1, 91kDa                            |
| CTH      | 217127_at   | 3.327 | AL354872   | Hs.19904  | cystathionase (cystathionine gamma-lyase)                                            |
| GAS7     | 211067_s_at | 3.321 | BC006454   | Hs.462214 | growth arrest-specific 7 ; growth arrest-specific 7                                  |
| ME1      | 204058_at   | 3.316 | AL049699   | Hs.21160  | Malic enzyme 1, NADP(+)-dependent, cytosolic                                         |
| FTH1     | 200748_s_at | 3.288 | NM_002032  | Hs.558804 | ferritin, heavy polypeptide 1                                                        |
| FLJ20273 | 218035_s_at | 3.276 | NM_019027  | Hs.518727 | RNA-binding protein                                                                  |
| SLC2A3   | 222088_s_at | 3.267 | AA778684   | Hs.419240 | solute carrier family 2 (facilitated glucose transporter), member 3                  |
| APOBEC3G | 214995_s_at | 3.254 | BF508948   | Hs.474853 | apolipoprotein B mRNA editing enzyme, catalytic polypeptide-like 3G                  |
| IDS      | 202438_x_at | 3.244 | BF346014   | Hs.567240 | iduronate 2-sulfatase (Hunter syndrome)                                              |
| MTSS1    | 203037_s_at | 3.243 | NM_014751  | Hs.336994 | metastasis suppressor 1                                                              |
| TRIM5    | 210705_s_at | 3.242 | AF220028   | Hs.370515 | tripartite motif-containing 5                                                        |
| RELB     | 205205_at   | 3.238 | NM_006509  | Hs.307905 | v-rel reticuloendotheliosis viral oncogene homolog B                                 |
| PBEF1    | 217738_at   | 3.237 | BF575514   | Hs.489615 | pre-B-cell colony enhancing factor 1                                                 |
| TCF7L2   | 212762_s_at | 3.231 | AI375916   | Hs.501080 | transcription factor 7-like 2 (T-cell specific, HMG-box)                             |
| ARL7     | 202206_at   | 3.219 | AW450363   | Hs.111554 | ADP-ribosylation factor-like 7                                                       |
| PDE4B    | 211302_s_at | 3.206 | L20966     | Hs.198072 | phosphodiesterase 4B, cAMP-specific (phosphodiesterase E4 dunce homolog, Drosophila) |
| FLJ11286 | 218429_s_at | 3.203 | NM_018381  | Hs.175120 | hypothetical protein FLJ11286                                                        |
| PILRA    | 222218_s_at | 3.2   | AJ400843   | Hs.444407 | paired immunoglobulin-like type 2 receptor alpha                                     |
| MAF      | 209348_s_at | 3.178 | AF055376   | Hs.134859 | v-maf musculoaponeurotic fibrosarcoma oncogene homolog (avian)                       |
| STC2     | 203439_s_at | 3.177 | BC000658   | Hs.233160 | stanniocalcin 2                                                                      |
| COL6A1   | 213428_s_at | 3.155 | AA292373   | Hs.474053 | collagen, type VI, alpha 1                                                           |
| HIP1     | 205425_at   | 3.142 | NM_005338  | Hs.329266 | huntingtin interacting protein 1                                                     |
| TCF4     | 212386_at   | 3.142 | BF592782   | Hs.200285 | Transcription factor 4                                                               |
| ACSL1    | 201963_at   | 3.136 | NM_021122  | Hs.406678 | acyl-CoA synthetase long-chain family member 1                                       |
| SP100    | 202864_s_at | 3.131 | NM_003113  | Hs.369056 | nuclear antigen Sp100                                                                |
| CTSB     | 200839_s_at | 3.13  | NM_001908  | Hs.520898 | cathepsin B                                                                          |
| NFE2L1   | 200758_s_at | 3.127 | AI361227   | Hs.514284 | nuclear factor (erythroid-derived 2)-like 1                                          |

|               |             |       |           |           |                                                                                                          |
|---------------|-------------|-------|-----------|-----------|----------------------------------------------------------------------------------------------------------|
| VEGF          | 210512_s_at | 3.125 | AF022375  | Hs.73793  | vascular endothelial growth factor                                                                       |
| RHBDL6        | 219202_at   | 3.124 | NM_024599 | Hs.464157 | rhomboid, veinlet-like 6 (Drosophila)                                                                    |
| LR8           | 220532_s_at | 3.121 | NM_014020 | Hs.521295 | LR8 protein                                                                                              |
| ICAM1         | 215485_s_at | 3.121 | AA284705  | Hs.515126 | intercellular adhesion molecule 1 (CD54), human rhinovirus receptor                                      |
| MMP14         | 202828_s_at | 3.12  | NM_004995 | Hs.2399   | matrix metalloproteinase 14 (membrane-inserted)                                                          |
| TCF4          | 203753_at   | 3.11  | NM_003199 | Hs.200285 | transcription factor 4                                                                                   |
| RIN2          | 209684_at   | 3.092 | AL136924  | Hs.472270 | Ras and Rab interactor 2                                                                                 |
| PHLDA1        | 217997_at   | 3.089 | AI795908  | Hs.558462 | pleckstrin homology-like domain, family A, member 1                                                      |
| BST2          | 201641_at   | 3.074 | NM_004335 | Hs.118110 | bone marrow stromal cell antigen 2                                                                       |
| CCR1          | 205099_s_at | 3.056 | NM_001295 | Hs.301921 | chemokine (C-C motif) receptor 1                                                                         |
| MUC1          | 207847_s_at | 3.056 | NM_002456 | Hs.89603  | mucin 1, transmembrane                                                                                   |
| TNFAIP2       | 202510_s_at | 3.056 | NM_006291 | Hs.525607 | tumor necrosis factor, alpha-induced protein 2                                                           |
| HLA-C         | 211799_x_at | 3.047 | U62824    | Hs.534125 | major histocompatibility complex, class I, C                                                             |
| RAB8B         | 219210_s_at | 3.042 | NM_016530 | Hs.389733 | RAB8B, member RAS oncogene family                                                                        |
| CYBB          | 203923_s_at | 3.037 | NM_000397 | Hs.292356 | cytochrome b-245, beta polypeptide (chronic granulomatous disease)                                       |
| SQSTM1        | 201471_s_at | 3.013 | NM_003900 | Hs.529892 | sequestosome 1                                                                                           |
| AMPD3         | 207992_s_at | 3.008 | NM_000480 | Hs.501890 | adenosine monophosphate deaminase (isoform E)                                                            |
| FAM26B        | 57715_at    | 3.008 | W72694    | Hs.241545 | family with sequence similarity 26, member B                                                             |
| HLA-G ; HLA-H | 217436_x_at | 2.989 | M80469    | Hs.512152 | HLA-G histocompatibility antigen, class I, G ; major histocompatibility complex, class I, H (pseudogene) |
| IFNGR2        | 201642_at   | 2.986 | NM_005534 | Hs.517240 | interferon gamma receptor 2 (interferon gamma transducer 1)                                              |
| IFI30         | 201422_at   | 2.982 | NM_006332 | Hs.14623  | interferon, gamma-inducible protein 30                                                                   |
| PHF11         | 221816_s_at | 2.975 | BF055474  | Hs.369039 | PHD finger protein 11                                                                                    |
| EIF2AK2       | 204211_x_at | 2.97  | NM_002759 | Hs.131431 | eukaryotic translation initiation factor 2-alpha kinase 2                                                |
| ISGF3G        | 203882_at   | 2.964 | NM_006084 | Hs.1706   | interferon-stimulated transcription factor 3, gamma 48kDa                                                |
| N4BP1         | 32069_at    | 2.942 | AB014515  | Hs.558438 | Nedd4 binding protein 1                                                                                  |
| GRB10         | 209409_at   | 2.938 | D86962    | Hs.164060 | growth factor receptor-bound protein 10                                                                  |
| STAT2         | 205170_at   | 2.917 | NM_005419 | Hs.530595 | signal transducer and activator of transcription 2, 113kDa                                               |
| NINJ1         | 203045_at   | 2.906 | NM_004148 | Hs.494457 | ninjurin 1                                                                                               |
| FTHP1         | 211628_x_at | 2.905 | J04755    | Hs.453583 | ferritin, heavy polypeptide pseudogene 1 ; ferritin, heavy polypeptide pseudogene 1                      |
| NRP1          | 212298_at   | 2.881 | BE620457  | Hs.131704 | neuropilin 1                                                                                             |
| ETV5          | 203349_s_at | 2.872 | NM_004454 | Hs.43697  | ets variant gene 5 (ets-related molecule)                                                                |
| MT2A          | 212185_x_at | 2.872 | NM_005953 | Hs.418241 | metallothionein 2A                                                                                       |
| BHLHB2        | 201170_s_at | 2.87  | NM_003670 | Hs.171825 | basic helix-loop-helix domain containing, class B, 2                                                     |
| NFE2L1        | 200759_x_at | 2.869 | NM_003204 | Hs.514284 | nuclear factor (erythroid-derived 2)-like 1                                                              |
| RNF41         | 201961_s_at | 2.864 | AL583171  | Hs.524502 | ring finger protein 41                                                                                   |
| MARCKS        | 213002_at   | 2.858 | AA770596  | Hs.519909 | Myristoylated alanine-rich protein kinase C substrate                                                    |
| APOBEC3G      | 204205_at   | 2.857 | NM_021822 | Hs.474853 | apolipoprotein B mRNA editing enzyme, catalytic polypeptide-like 3G                                      |
| H1FO          | 208886_at   | 2.851 | BC000145  | Hs.226117 | H1 histone family, member 0                                                                              |
| ITGAL         | 213475_s_at | 2.848 | AC002310  | Hs.174103 | integrin, alpha L (antigen CD11A (p180), lymphocyte function-associated antigen 1; alpha polypeptide)    |
| CD44          | 209835_x_at | 2.844 | BC004372  | Hs.502328 | CD44 antigen (homing function and Indian blood group system)                                             |
| TOM1          | 202807_s_at | 2.842 | NM_005488 | Hs.474705 | target of myb1 (chicken)                                                                                 |
| OPTN          | 202073_at   | 2.832 | AV757675  | Hs.332706 | optineurin                                                                                               |



|          |             |       |           |           |                                                                                                                  |
|----------|-------------|-------|-----------|-----------|------------------------------------------------------------------------------------------------------------------|
| PPARD    | 208044_s_at | 2.829 | NM_006238 | Hs.485196 | peroxisome proliferative activated receptor, delta                                                               |
| MERTK    | 211913_s_at | 2.825 | L08961    | Hs.306178 | c-mer proto-oncogene tyrosine kinase ; c-mer proto-oncogene tyrosine kinase                                      |
| TCTEL1   | 201999_s_at | 2.808 | NM_006519 | Hs.445999 | t-complex-associated-testis-expressed 1-like 1                                                                   |
| MMP12    | 204580_at   | 2.807 | NM_002426 | Hs.1695   | matrix metalloproteinase 12 (macrophage elastase)                                                                |
| CHMP5    | 219356_s_at | 2.797 | NM_016410 | Hs.415534 | chromatin modifying protein 5                                                                                    |
| LAP3     | 217933_s_at | 2.796 | NM_015907 | Hs.479264 | leucine aminopeptidase 3                                                                                         |
| CFLAR    | 209939_x_at | 2.791 | AF005775  | Hs.390736 | CASP8 and FADD-like apoptosis regulator                                                                          |
| AXL      | 202686_s_at | 2.757 | NM_021913 | Hs.466791 | AXL receptor tyrosine kinase                                                                                     |
| SEMA4A   | 219259_at   | 2.752 | NM_022367 | Hs.408846 | sema domain, immunoglobulin domain (Ig), transmembrane domain (TM) and short cytoplasmic domain, (semaphorin) 4A |
| LGALS3BP | 200923_at   | 2.743 | NM_005567 | Hs.514535 | lectin, galactoside-binding, soluble, 3 binding protein                                                          |
| DPY19L1  | 212792_at   | 2.733 | AB020684  | Hs.408623 | dpy-19-like 1 (C. elegans)                                                                                       |
| IL23A    | 220054_at   | 2.726 | NM_016584 | Hs.98309  | interleukin 23, alpha subunit p19                                                                                |
| PSD3     | 203355_s_at | 2.722 | NM_015310 | Hs.434255 | pleckstrin and Sec7 domain containing 3                                                                          |
| CD44     | 204490_s_at | 2.716 | M24915    | Hs.502328 | CD44 antigen (homing function and Indian blood group system)                                                     |
| ASNS     | 205047_s_at | 2.71  | NM_001673 | Hs.489207 | asparagine synthetase                                                                                            |
| TOR1B    | 209593_s_at | 2.706 | AF317129  | Hs.252682 | torsin family 1, member B (torsin B)                                                                             |
| NFE2L1   | 214179_s_at | 2.701 | H93013    | Hs.514284 | nuclear factor (erythroid-derived 2)-like 1                                                                      |
| GK       | 207387_s_at | 2.7   | NM_000167 | Hs.1466   | glycerol kinase                                                                                                  |
| GAS7     | 202191_s_at | 2.696 | BE439987  | Hs.462214 | growth arrest-specific 7                                                                                         |
| IFITM2   | 201315_x_at | 2.681 | NM_006435 | Hs.174195 | interferon induced transmembrane protein 2 (1-8D)                                                                |
| CYP1B1   | 202437_s_at | 2.675 | NM_000104 | Hs.154654 | cytochrome P450, family 1, subfamily B, polypeptide 1                                                            |
| CYLD     | 221903_s_at | 2.67  | BE046443  | Hs.432993 | cylindromatosis (turban tumor syndrome)                                                                          |
| FLJ38348 | 213294_at   | 2.633 | AV755522  | Hs.546523 | Hypothetical protein FLJ38348                                                                                    |
| pp9099   | 204436_at   | 2.629 | NM_025201 | Hs.458575 | PH domain-containing protein                                                                                     |
| PLCL1    | 205934_at   | 2.628 | NM_006226 | Hs.153322 | phospholipase C-like 1                                                                                           |
| CASP1    | 211368_s_at | 2.628 | U13700    | Hs.2490   | caspace 1, apoptosis-related cysteine peptidase (interleukin 1, beta, convertase)                                |
| C1orf38  | 207571_x_at | 2.626 | NM_004848 | Hs.10649  | chromosome 1 open reading frame 38                                                                               |
| S100A9   | 203535_at   | 2.625 | NM_002965 | Hs.112405 | S100 calcium binding protein A9 (calgranulin B)                                                                  |
| PLXNC1   | 206471_s_at | 2.623 | NM_005761 | Hs.554795 | plexin C1                                                                                                        |
| ARID5B   | 212614_at   | 2.623 | BG285011  | Hs.535297 | AT rich interactive domain 5B (MRF1-like)                                                                        |
| LIMK2    | 217475_s_at | 2.622 | AC002073  | Hs.474596 | LIM domain kinase 2                                                                                              |
| SLC2A3   | 202499_s_at | 2.618 | NM_006931 | Hs.419240 | solute carrier family 2 (facilitated glucose transporter), member 3                                              |
| ETS2     | 201329_s_at | 2.617 | NM_005239 | Hs.517296 | v-ets erythroblastosis virus E26 oncogene homolog 2 (avian)                                                      |
| CTSB     | 213274_s_at | 2.615 | AA020826  | Hs.520898 | cathepsin B                                                                                                      |
| KLF9     | 203543_s_at | 2.605 | NM_001206 | Hs.150557 | Kruppel-like factor 9                                                                                            |
| C1orf24  | 217966_s_at | 2.605 | NM_022083 | Hs.518662 | chromosome 1 open reading frame 24                                                                               |
| PNMA2    | 209598_at   | 2.603 | AB020690  | Hs.521466 | paraneoplastic antigen MA2                                                                                       |
| HLA-G    | 211528_x_at | 2.599 | M90685    | Hs.512152 | HLA-G histocompatibility antigen, class I, G                                                                     |
| FKBP5    | 204560_at   | 2.594 | NM_004117 | Hs.558328 | FK506 binding protein 5                                                                                          |
| LGALS9   | 203236_s_at | 2.593 | NM_009587 | Hs.81337  | lectin, galactoside-binding, soluble, 9 (galectin 9)                                                             |
| C1orf38  | 210785_s_at | 2.585 | AB035482  | Hs.10649  | chromosome 1 open reading frame 38                                                                               |
| SLC15A3  | 219593_at   | 2.581 | NM_016582 | Hs.237856 | solute carrier family 15, member 3                                                                               |

|           |             |       |           |           |                                                                                 |
|-----------|-------------|-------|-----------|-----------|---------------------------------------------------------------------------------|
| VEGF      | 210513_s_at | 2.573 | AF091352  | Hs.73793  | vascular endothelial growth factor                                              |
| MYCL1     | 214058_at   | 2.568 | M19720    | Hs.437922 | v-myc myelocytomatosis viral oncogene homolog 1, lung carcinoma derived (avian) |
| NAGK      | 218231_at   | 2.566 | NM_017567 | Hs.7036   | N-acetylglucosamine kinase ; N-acetylglucosamine kinase                         |
| TCF4      | 213891_s_at | 2.565 | AI927067  | Hs.200285 | Transcription factor 4                                                          |
| NQO1      | 210519_s_at | 2.564 | BC000906  | Hs.406515 | NAD(P)H dehydrogenase, quinone 1                                                |
| DTX4      | 212611_at   | 2.562 | AV728526  | Hs.558464 | deltex 4 homolog (Drosophila)                                                   |
| CTSB      | 200838_at   | 2.557 | NM_001908 | Hs.520898 | cathepsin B                                                                     |
| KIAA0674  | 76897_s_at  | 2.554 | AA628140  | Hs.522351 | KIAA0674                                                                        |
| EXT1      | 201995_at   | 2.536 | NM_000127 | Hs.492618 | exostoses (multiple) 1                                                          |
| UBE1L     | 203281_s_at | 2.535 | NM_003335 | Hs.16695  | ubiquitin-activating enzyme E1-like                                             |
| WARS      | 200628_s_at | 2.532 | M61715    | Hs.497599 | tryptophanyl-tRNA synthetase                                                    |
| MARCKSL1  | 200644_at   | 2.53  | NM_023009 | Hs.75061  | MARCKS-like 1                                                                   |
| CD44      | 212014_x_at | 2.528 | AI493245  | Hs.502328 | CD44 antigen (homing function and Indian blood group system)                    |
| EHD1      | 208112_x_at | 2.524 | NM_006795 | Hs.523774 | EH-domain containing 1                                                          |
| EHD1      | 209039_x_at | 2.523 | AF001434  | Hs.523774 | EH-domain containing 1                                                          |
| ARTS-1    | 210385_s_at | 2.523 | AF106037  | Hs.436186 | type 1 tumor necrosis factor receptor shedding aminopeptidase regulator         |
| PPARD     | 37152_at    | 2.521 | L07592    | Hs.485196 | peroxisome proliferative activated receptor, delta                              |
| CFLAR     | 210563_x_at | 2.51  | U97075    | Hs.390736 | CASP8 and FADD-like apoptosis regulator                                         |
| RAFTLIN   | 212646_at   | 2.506 | D42043    | Hs.98910  | raft-linking protein                                                            |
| PTPRC     | 212587_s_at | 2.506 | AI809341  | Hs.192039 | protein tyrosine phosphatase, receptor type, C                                  |
| UGCG      | 221765_at   | 2.501 | AI378044  | Hs.304249 | UDP-glucose ceramide glucosyltransferase                                        |
| NADK      | 208917_x_at | 2.496 | BE674658  | Hs.456572 | NAD kinase                                                                      |
| PSAT1     | 220892_s_at | 2.49  | NM_021154 | Hs.494261 | phosphoserine aminotransferase 1                                                |
| SECTM1    | 213716_s_at | 2.486 | BF939675  | Hs.558009 | secreted and transmembrane 1                                                    |
| LRP12     | 219631_at   | 2.481 | NM_024937 | Hs.301974 | low density lipoprotein-related protein 12                                      |
| RAB13     | 202252_at   | 2.478 | NM_002870 | Hs.558375 | RAB13, member RAS oncogene family                                               |
| CTNND1    | 208862_s_at | 2.478 | AW073672  | Hs.166011 | catenin (cadherin-associated protein), delta 1                                  |
| CHMP5     | 218085_at   | 2.473 | NM_015961 | Hs.415534 | chromatin modifying protein 5                                                   |
| SLA       | 203761_at   | 2.469 | NM_006748 | Hs.75367  | Src-like-adaptor ; Src-like-adaptor                                             |
| ABCA1     | 203505_at   | 2.468 | AF285167  | Hs.429294 | ATP-binding cassette, sub-family A (ABC1), member 1                             |
| HIST2H2AA | 218280_x_at | 2.465 | NM_003516 | Hs.530461 | histone 2, H2aa                                                                 |
| LAIR2     | 207509_s_at | 2.459 | NM_002288 | Hs.43803  | leukocyte-associated Ig-like receptor 2                                         |
| PHLDA1    | 217996_at   | 2.454 | AA576961  | Hs.558462 | pleckstrin homology-like domain, family A, member 1                             |
| PMAIP1    | 204285_s_at | 2.451 | AI857639  | Hs.96     | phorbol-12-myristate-13-acetate-induced protein 1                               |
| TRIM38    | 203610_s_at | 2.45  | AI363270  | Hs.202510 | tripartite motif-containing 38                                                  |
| HECA      | 218603_at   | 2.449 | NM_016217 | Hs.197644 | headcase homolog (Drosophila)                                                   |
| PLXNC1    | 213241_at   | 2.449 | AF035307  | Hs.554795 | plexin C1                                                                       |
| RIT1      | 209882_at   | 2.443 | AF084462  | Hs.491234 | Ras-like without CAAX 1                                                         |
| WSB1      | 201295_s_at | 2.44  | BF111821  | Hs.446017 | WD repeat and SOCS box-containing 1                                             |
| TCF4      | 212382_at   | 2.438 | BF433429  | Hs.200285 | Transcription factor 4                                                          |
| PIR       | 207469_s_at | 2.435 | NM_003662 | Hs.495728 | pirin (iron-binding nuclear protein)                                            |
| PVRL3     | 213325_at   | 2.435 | AA129716  | Hs.293917 | poliovirus receptor-related 3                                                   |

|          |             |       |           |           |                                                                                                 |
|----------|-------------|-------|-----------|-----------|-------------------------------------------------------------------------------------------------|
| NCOA2    | 205732_s_at | 2.431 | NM_006540 | Hs.446678 | nuclear receptor coactivator 2                                                                  |
| RPS6KA2  | 212912_at   | 2.431 | AI992251  | Hs.147119 | ribosomal protein S6 kinase, 90kDa, polypeptide 2                                               |
| CFLAR    | 208485_x_at | 2.423 | NM_003879 | Hs.390736 | CASP8 and FADD-like apoptosis regulator                                                         |
| HLA-A    | 215313_x_at | 2.423 | AA573862  | Hs.181244 | major histocompatibility complex, class I, A                                                    |
| CASP1    | 211367_s_at | 2.418 | U13699    | Hs.2490   | caspace 1, apoptosis-related cysteine peptidase (interleukin 1, beta, convertase)               |
| PTPNS1   | 202897_at   | 2.411 | AB023430  | Hs.128846 | protein tyrosine phosphatase, non-receptor type substrate 1                                     |
| ASS      | 207076_s_at | 2.41  | NM_000050 | Hs.558301 | argininosuccinate synthetase                                                                    |
| FYB      | 205285_s_at | 2.405 | AI633888  | Hs.370503 | FYN binding protein (FYB-120/130)                                                               |
| TNIP1    | 207196_s_at | 2.4   | NM_006058 | Hs.355141 | TNFAIP3 interacting protein 1                                                                   |
| FOS      | 209189_at   | 2.398 | BC004490  | Hs.25647  | v-fos FBJ murine osteosarcoma viral oncogene homolog                                            |
| HLA-E    | 200905_x_at | 2.396 | NM_005516 | Hs.381008 | major histocompatibility complex, class I, E                                                    |
| RGS16    | 209325_s_at | 2.395 | U94829    | Hs.413297 | regulator of G-protein signalling 16                                                            |
| LILRB1   | 207104_x_at | 2.391 | NM_006669 | Hs.149924 | leukocyte immunoglobulin-like receptor, subfamily B (with TM and ITIM domains), member 1        |
| HLX1     | 214438_at   | 2.39  | M60721    | Hs.74870  | H2.0-like homeo box 1 (Drosophila)                                                              |
| AGRN     | 212285_s_at | 2.382 | AW008051  | Hs.273330 | agrin                                                                                           |
| PANX1    | 204715_at   | 2.379 | NM_015368 | Hs.503584 | pannexin 1                                                                                      |
| PSTPIP2  | 219938_s_at | 2.377 | NM_024430 | Hs.368623 | proline-serine-threonine phosphatase interacting protein 2                                      |
| SDS      | 205695_at   | 2.377 | NM_006843 | Hs.439023 | serine dehydratase                                                                              |
| PTPRO    | 208121_s_at | 2.376 | NM_002848 | Hs.160871 | protein tyrosine phosphatase, receptor type, O ; protein tyrosine phosphatase, receptor type, O |
| CEBPB    | 212501_at   | 2.376 | AL564683  | Hs.517106 | CCAAT/enhancer binding protein (C/EBP), beta                                                    |
| PTPRC    | 212588_at   | 2.372 | Y00062    | Hs.192039 | protein tyrosine phosphatase, receptor type, C                                                  |
| CYP1B1   | 202436_s_at | 2.371 | AU144855  | Hs.154654 | cytochrome P450, family 1, subfamily B, polypeptide 1                                           |
| MYD88    | 209124_at   | 2.368 | U70451    | Hs.82116  | myeloid differentiation primary response gene (88)                                              |
| GRINA    | 212090_at   | 2.364 | AL571424  | Hs.339697 | glutamate receptor, ionotropic, N-methyl D-aspartate-associated protein 1 (glutamate binding)   |
| GSDMDC1  | 218154_at   | 2.361 | NM_024736 | Hs.118983 | gasdermin domain containing 1                                                                   |
| NADK     | 215159_s_at | 2.358 | AI239732  | Hs.456572 | NAD kinase                                                                                      |
| IRF2     | 203275_at   | 2.358 | NM_002199 | Hs.374097 | interferon regulatory factor 2                                                                  |
| SASH1    | 213236_at   | 2.357 | AK025495  | Hs.193133 | SAM and SH3 domain containing 1                                                                 |
| ATF4     | 200779_at   | 2.353 | NM_001675 | Hs.496487 | activating transcription factor 4 (tax-responsive enhancer element B67)                         |
| KIAA1280 | 219520_s_at | 2.348 | NM_018458 | Hs.527524 | KIAA1280 protein                                                                                |
| SQRDL    | 217995_at   | 2.339 | NM_021199 | Hs.511251 | sulfide quinone reductase-like (yeast)                                                          |
| SLC31A2  | 204204_at   | 2.33  | NM_001860 | Hs.24030  | solute carrier family 31 (copper transporters), member 2                                        |
| ST8SIA4  | 206925_at   | 2.328 | NM_005668 | Hs.308628 | ST8 alpha-N-acetyl-neuraminidase alpha-2,8-sialyltransferase 4                                  |
| NFE2L3   | 204702_s_at | 2.326 | NM_004289 | Hs.404741 | nuclear factor (erythroid-derived 2)-like 3                                                     |
| LIMK2    | 210582_s_at | 2.325 | AL117466  | Hs.474596 | LIM domain kinase 2                                                                             |
| CASP1    | 209970_x_at | 2.323 | M87507    | Hs.2490   | caspace 1, apoptosis-related cysteine peptidase (interleukin 1, beta, convertase)               |
| NEU1     | 208926_at   | 2.315 | U84246    | Hs.520037 | sialidase 1 (lysosomal sialidase)                                                               |
| CCR1     | 205098_at   | 2.31  | AI421071  | Hs.301921 | chemokine (C-C motif) receptor 1                                                                |
| SLC7A7   | 204588_s_at | 2.305 | NM_003982 | Hs.513147 | solute carrier family 7 (cationic amino acid transporter, y+ system), member 7                  |
| PPP1R15A | 37028_at    | 2.305 | U83981    | Hs.76556  | protein phosphatase 1, regulatory (inhibitor) subunit 15A                                       |
| HLA-F    | 204806_x_at | 2.305 | NM_018950 | Hs.519972 | major histocompatibility complex, class I, F                                                    |
| CBR1     | 209213_at   | 2.299 | BC002511  | Hs.88778  | carbonyl reductase 1                                                                            |

|          |             |       |           |           |                                                                                               |
|----------|-------------|-------|-----------|-----------|-----------------------------------------------------------------------------------------------|
| ATF3     | 202672_s_at | 2.297 | NM_001674 | Hs.460    | activating transcription factor 3                                                             |
| SP100    | 210218_s_at | 2.291 | U36501    | Hs.369056 | nuclear antigen Sp100                                                                         |
| GIMAP5   | 64064_at    | 2.29  | AI435089  | Hs.412331 | GTPase, IMAP family member 5                                                                  |
| FER1L3   | 201798_s_at | 2.286 | NM_013451 | Hs.500572 | fer-1-like 3, myoferlin (C. elegans)                                                          |
| NPC1     | 202679_at   | 2.277 | NM_000271 | Hs.464779 | Niemann-Pick disease, type C1                                                                 |
| GRB10    | 210999_s_at | 2.276 | U66065    | Hs.164060 | growth factor receptor-bound protein 10                                                       |
| HLA-F    | 221875_x_at | 2.271 | AW514210  | Hs.519972 | major histocompatibility complex, class I, F                                                  |
| SLA      | 203760_s_at | 2.27  | U44403    | Hs.75367  | Src-like-adaptor ; Src-like-adaptor                                                           |
| PROCR    | 203650_at   | 2.264 | NM_006404 | Hs.82353  | protein C receptor, endothelial (EPCR)                                                        |
| CD36     | 209555_s_at | 2.263 | M98399    | Hs.120949 | CD36 antigen (collagen type I receptor, thrombospondin receptor)                              |
| CENTA2   | 219358_s_at | 2.263 | NM_018404 | Hs.514063 | centaurin, alpha 2                                                                            |
| SPTLC2   | 216202_s_at | 2.263 | U15555    | Hs.435661 | serine palmitoyltransferase, long chain base subunit 2                                        |
| PTPRC    | 207238_s_at | 2.263 | NM_002838 | Hs.192039 | protein tyrosine phosphatase, receptor type, C                                                |
| P8       | 209230_s_at | 2.261 | AF135266  | Hs.513463 | p8 protein (candidate of metastasis 1)                                                        |
| SMAD7    | 204790_at   | 2.26  | NM_005904 | Hs.465087 | SMAD, mothers against DPP homolog 7 (Drosophila)                                              |
| MT1X     | 208581_x_at | 2.259 | NM_005952 | Hs.374950 | metallothionein 1X                                                                            |
| RTN1     | 203485_at   | 2.259 | NM_021136 | Hs.368626 | reticulon 1                                                                                   |
| UGCG     | 204881_s_at | 2.256 | NM_003358 | Hs.304249 | UDP-glucose ceramide glucosyltransferase                                                      |
| OSBPL11  | 218304_s_at | 2.254 | NM_022776 | Hs.477440 | oxysterol binding protein-like 11                                                             |
| MMP14    | 160020_at   | 2.254 | Z48481    | Hs.2399   | matrix metalloproteinase 14 (membrane-inserted)                                               |
| AGRN     | 217419_x_at | 2.252 | AK021586  | Hs.273330 | agrin                                                                                         |
| MGLL     | 211026_s_at | 2.246 | BC006230  | Hs.277035 | monoglyceride lipase ; monoglyceride lipase                                                   |
| CFLAR    | 211317_s_at | 2.245 | AF041461  | Hs.390736 | CASP8 and FADD-like apoptosis regulator                                                       |
| SSH1     | 221753_at   | 2.24  | AI651213  | Hs.199763 | slingshot homolog 1 (Drosophila)                                                              |
| ABCA1    | 203504_s_at | 2.239 | NM_005502 | Hs.429294 | ATP-binding cassette, sub-family A (ABC1), member 1                                           |
| CYP1B1   | 202435_s_at | 2.238 | AU154504  | Hs.154654 | cytochrome P450, family 1, subfamily B, polypeptide 1                                         |
| HLA-B    | 208729_x_at | 2.237 | D83043    | Hs.77961  | major histocompatibility complex, class I, B                                                  |
| NFKB1    | 209239_at   | 2.236 | M55643    | Hs.431926 | nuclear factor of kappa light polypeptide gene enhancer in B-cells 1 (p105)                   |
| CSPG2    | 215646_s_at | 2.235 | R94644    | Hs.443681 | chondroitin sulfate proteoglycan 2 (versican) ; chondroitin sulfate proteoglycan 2 (versican) |
| ZCCHC2   | 219062_s_at | 2.235 | NM_017742 | Hs.114191 | zinc finger, CCHC domain containing 2                                                         |
| KIAA0247 | 202181_at   | 2.233 | NM_014734 | Hs.440025 | KIAA0247                                                                                      |
| CSF2RB   | 205159_at   | 2.229 | AV756141  | Hs.285401 | colony stimulating factor 2 receptor, beta, low-affinity (granulocyte-macrophage)             |
| SLC11A2  | 203124_s_at | 2.227 | NM_000617 | Hs.505545 | solute carrier family 11 (proton-coupled divalent metal ion transporters), member 2           |
| CASP1    | 211366_x_at | 2.221 | U13698    | Hs.2490   | caspace 1, apoptosis-related cysteine peptidase (interleukin 1, beta, convertase)             |
| CARS     | 212971_at   | 2.219 | AI769685  | Hs.274873 | cysteinyl-tRNA synthetase                                                                     |
| STAT4    | 206118_at   | 2.216 | NM_003151 | Hs.80642  | signal transducer and activator of transcription 4                                            |
| LIMK2    | 202193_at   | 2.215 | NM_005569 | Hs.474596 | LIM domain kinase 2                                                                           |
| CASP7    | 207181_s_at | 2.214 | NM_001227 | Hs.9216   | caspace 7, apoptosis-related cysteine peptidase                                               |
| P2RX4    | 204088_at   | 2.212 | NM_002560 | Hs.321709 | purinergic receptor P2X, ligand-gated ion channel, 4                                          |
| CSPG2    | 211571_s_at | 2.206 | D32039    | Hs.443681 | chondroitin sulfate proteoglycan 2 (versican)                                                 |
| STAT3    | 208991_at   | 2.206 | AA634272  | Hs.463059 | signal transducer and activator of transcription 3 (acute-phase response factor)              |
| SLC7A5   | 201195_s_at | 2.202 | AB018009  | Hs.513797 | solute carrier family 7 (cationic amino acid transporter, y+ system), member 5                |

|          |             |       |           |           |                                                                                                               |
|----------|-------------|-------|-----------|-----------|---------------------------------------------------------------------------------------------------------------|
| SLC7A11  | 209921_at   | 2.202 | AB040875  | Hs.390594 | solute carrier family 7, (cationic amino acid transporter, y+ system) member 11                               |
| HLA-G    | 211529_x_at | 2.201 | M90684    | Hs.512152 | HLA-G histocompatibility antigen, class I, G                                                                  |
| PVRL2    | 203149_at   | 2.194 | NM_002856 | Hs.326371 | poliovirus receptor-related 2 (herpesvirus entry mediator B)                                                  |
| CHST11   | 219634_at   | 2.192 | NM_018413 | Hs.17569  | carbohydrate (chondroitin 4) sulfotransferase 11                                                              |
| TRIM16   | 204341_at   | 2.172 | NM_006470 | Hs.164324 | tripartite motif-containing 16 ; similar to tripartite motif-containing 16; estrogen-responsive B box protein |
| GK       | 215977_x_at | 2.171 | X68285    | Hs.1466   | glycerol kinase                                                                                               |
| RASSF4   | 49306_at    | 2.169 | AI890191  | Hs.522895 | Ras association (RalGDS/AF-6) domain family 4                                                                 |
| IKBKE    | 204549_at   | 2.167 | NM_014002 | Hs.321045 | inhibitor of kappa light polypeptide gene enhancer in B-cells, kinase epsilon                                 |
| MVP      | 202180_s_at | 2.165 | NM_017458 | Hs.513488 | major vault protein                                                                                           |
| PTX3     | 206157_at   | 2.164 | NM_002852 | Hs.127657 | pentraxin-related gene, rapidly induced by IL-1 beta                                                          |
| IFNGR1   | 202727_s_at | 2.161 | NM_000416 | Hs.520414 | interferon gamma receptor 1                                                                                   |
| GK       | 217167_x_at | 2.159 | AJ252550  | Hs.1466   | glycerol kinase                                                                                               |
| TCF7L2   | 216037_x_at | 2.159 | AA664011  | Hs.501080 | transcription factor 7-like 2 (T-cell specific, HMG-box)                                                      |
| NQO1     | 201468_s_at | 2.159 | NM_000903 | Hs.406515 | NAD(P)H dehydrogenase, quinone 1                                                                              |
| DENND3   | 212974_at   | 2.153 | AI808958  | Hs.18166  | DENN/MADD domain containing 3                                                                                 |
| CD53     | 203416_at   | 2.151 | NM_000560 | Hs.443057 | CD53 antigen                                                                                                  |
| NR1H3    | 203920_at   | 2.15  | NM_005693 | Hs.438863 | nuclear receptor subfamily 1, group H, member 3                                                               |
| JUNB     | 201473_at   | 2.149 | NM_002229 | Hs.25292  | jun B proto-oncogene                                                                                          |
| IKBKE    | 214398_s_at | 2.147 | AW340333  | Hs.321045 | inhibitor of kappa light polypeptide gene enhancer in B-cells, kinase epsilon                                 |
| PPA1     | 217848_s_at | 2.146 | NM_021129 | Hs.437403 | pyrophosphatase (inorganic) 1                                                                                 |
| NPTX2    | 213479_at   | 2.137 | U26662    | Hs.3281   | neuronal pentraxin II                                                                                         |
| FYB      | 211795_s_at | 2.134 | AF198052  | Hs.370503 | FYN binding protein (FYB-120/130)                                                                             |
| NFKBIE   | 203927_at   | 2.132 | NM_004556 | Hs.458276 | nuclear factor of kappa light polypeptide gene enhancer in B-cells inhibitor, epsilon                         |
| RGS16    | 209324_s_at | 2.131 | BF304996  | Hs.413297 | regulator of G-protein signalling 16                                                                          |
| PLEK     | 203470_s_at | 2.128 | AI433595  | Hs.468840 | pleckstrin                                                                                                    |
| RAB6IP1  | 212561_at   | 2.124 | AA349595  | Hs.501857 | RAB6 interacting protein 1                                                                                    |
| ADA      | 204639_at   | 2.123 | NM_000022 | Hs.407135 | adenosine deaminase                                                                                           |
| RHOQ     | 212117_at   | 2.119 | BF978689  | Hs.549125 | ras homolog gene family, member Q                                                                             |
| EMR1     | 207111_at   | 2.119 | NM_001974 | Hs.2375   | egf-like module containing, mucin-like, hormone receptor-like 1                                               |
| PLAUR    | 210845_s_at | 2.118 | U08839    | Hs.466871 | plasminogen activator, urokinase receptor                                                                     |
| PTPNS1   | 202895_s_at | 2.117 | D86043    | Hs.128846 | protein tyrosine phosphatase, non-receptor type substrate 1                                                   |
| G6PD     | 202275_at   | 2.116 | NM_000402 | Hs.461047 | glucose-6-phosphate dehydrogenase                                                                             |
| FCGR1A   | 214511_x_at | 2.115 | L03419    | Hs.534956 | Fc fragment of IgG, high affinity Ia, receptor (CD64) ; Fc-gamma receptor I B2                                |
| SERPINI1 | 205352_at   | 2.11  | NM_005025 | Hs.478153 | serpin peptidase inhibitor, clade I (neuroserpin), member 1                                                   |
| SASH1    | 41644_at    | 2.108 | AB018333  | Hs.193133 | SAM and SH3 domain containing 1                                                                               |
| IER5     | 218611_at   | 2.108 | NM_016545 | Hs.15725  | immediate early response 5                                                                                    |
| LRP12    | 220253_s_at | 2.106 | NM_013437 | Hs.301974 | low density lipoprotein-related protein 12                                                                    |
| PRKCA    | 215195_at   | 2.101 | AF035594  | Hs.531704 | protein kinase C, alpha                                                                                       |
| MERTK    | 206028_s_at | 2.101 | NM_006343 | Hs.306178 | c-mer proto-oncogene tyrosine kinase                                                                          |
| ATP10A   | 214255_at   | 2.096 | N35112    | Hs.128041 | ATPase, Class V, type 10A                                                                                     |
| CFLAR    | 211862_x_at | 2.091 | AF015451  | Hs.390736 | CASP8 and FADD-like apoptosis regulator                                                                       |
| KCNN4    | 204401_at   | 2.09  | NM_002250 | Hs.10082  | potassium intermediate/small conductance calcium-activated channel, subfamily N, member 4                     |

|           |             |       |           |           |                                                                                             |
|-----------|-------------|-------|-----------|-----------|---------------------------------------------------------------------------------------------|
| ADAR      | 201786_s_at | 2.088 | NM_001111 | Hs.12341  | adenosine deaminase, RNA-specific                                                           |
| NRN1      | 218625_at   | 2.086 | NM_016588 | Hs.103291 | neuritin 1                                                                                  |
| IRF1      | 202531_at   | 2.084 | NM_002198 | Hs.436061 | interferon regulatory factor 1                                                              |
| RASSF4    | 221578_at   | 2.081 | AF260335  | Hs.522895 | Ras association (RalGDS/AF-6) domain family 4                                               |
| PCK2      | 202847_at   | 2.081 | NM_004563 | Hs.75812  | phosphoenolpyruvate carboxykinase 2 (mitochondrial)                                         |
| SH3BP5    | 201811_x_at | 2.076 | NM_004844 | Hs.257761 | SH3-domain binding protein 5 (BTK-associated)                                               |
| PSAP      | 200871_s_at | 2.068 | NM_002778 | Hs.523004 | prosaposin (variant Gaucher disease and variant metachromatic leukodystrophy)               |
| CTSO      | 203758_at   | 2.066 | AV729484  | Hs.75262  | cathepsin O                                                                                 |
| CD40      | 35150_at    | 2.066 | X60592    | Hs.472860 | CD40 antigen (TNF receptor superfamily member 5)                                            |
| TCF7L2    | 216511_s_at | 2.063 | AJ270770  | Hs.501080 | transcription factor 7-like 2 (T-cell specific, HMG-box)                                    |
| FMNL1     | 204789_at   | 2.063 | NM_005892 | Hs.100217 | formin-like 1                                                                               |
| PILRA     | 219788_at   | 2.062 | NM_013439 | Hs.444407 | paired immunoglobulin-like type 2 receptor alpha                                            |
| ECOP      | 208091_s_at | 2.052 | NM_030796 | Hs.488307 | EGFR-coamplified and overexpressed protein ; EGFR-coamplified and overexpressed protein     |
| HIST2H2BE | 202708_s_at | 2.048 | NM_003528 | Hs.2178   | histone 2, H2be                                                                             |
| ANXA3     | 209369_at   | 2.043 | M63310    | Hs.480042 | annexin A3                                                                                  |
| GAS7      | 202192_s_at | 2.04  | NM_005890 | Hs.462214 | growth arrest-specific 7                                                                    |
| STK10     | 203047_at   | 2.04  | NM_005990 | Hs.519756 | serine/threonine kinase 10                                                                  |
| ENG       | 201809_s_at | 2.039 | NM_000118 | Hs.76753  | endoglin (Osler-Rendu-Weber syndrome 1)                                                     |
| RAB31     | 217763_s_at | 2.037 | NM_006868 | Hs.99528  | RAB31, member RAS oncogene family                                                           |
| CLEC4M    | 207995_s_at | 2.033 | NM_014257 | Hs.421437 | C-type lectin domain family 4, member M                                                     |
| HLA-B     | 211911_x_at | 2.031 | L07950    | Hs.77961  | major histocompatibility complex, class I, B ; major histocompatibility complex, class I, B |
| PLEK      | 203471_s_at | 2.029 | NM_002664 | Hs.468840 | pleckstrin                                                                                  |
| TAPBP     | 208829_at   | 2.028 | AF029750  | Hs.370937 | TAP binding protein (tapasin)                                                               |
| TRAF3IP3  | 213888_s_at | 2.027 | AL022398  | Hs.147434 | TRAF3 interacting protein 3                                                                 |
| TAP2      | 204769_s_at | 2.023 | M74447    | Hs.502    | transporter 2, ATP-binding cassette, sub-family B (MDR/TAP)                                 |
| FOXJ2     | 203734_at   | 2.022 | NM_018416 | Hs.120844 | forkhead box J2                                                                             |
| PHACTR4   | 219235_s_at | 2.021 | NM_023923 | Hs.225641 | phosphatase and actin regulator 4                                                           |
| CTAGE1    | 220957_at   | 2.017 | NM_022663 | Hs.406709 | cutaneous T-cell lymphoma-associated antigen 1                                              |
| HES1      | 203394_s_at | 2.013 | BE973687  | Hs.250666 | hairy and enhancer of split 1, (Drosophila)                                                 |
| TANK      | 207616_s_at | 2.006 | NM_004180 | Hs.132257 | TRAF family member-associated NFKB activator                                                |
| FXN       | 205565_s_at | 0.5   | NM_000144 | Hs.29978  | frataxin                                                                                    |
| TRIOBP    | 210276_s_at | 0.5   | AF281030  | Hs.533030 | TRIO and F-actin binding protein                                                            |
| ACTN1     | 208636_at   | 0.499 | AI082078  | Hs.509765 | Actinin, alpha 1                                                                            |
| SHFM1     | 202276_at   | 0.499 | NM_006304 | Hs.489201 | split hand/foot malformation (ectrodactyly) type 1                                          |
| PGLS      | 218388_at   | 0.499 | NM_012088 | Hs.466165 | 6-phosphogluconolactonase                                                                   |
| FLJ10154  | 218067_s_at | 0.499 | NM_018011 | Hs.508644 | hypothetical protein FLJ10154                                                               |
| LOC339448 | 222000_at   | 0.498 | AI915947  | Hs.103939 | hypothetical protein LOC339448                                                              |
| GGA2      | 208914_at   | 0.498 | BE646414  | Hs.460336 | golgi associated, gamma adaptin ear containing, ARF binding protein 2                       |
| HEBP2     | 203430_at   | 0.497 | NM_014320 | Hs.486589 | heme binding protein 2                                                                      |
| NIPBL     | 212483_at   | 0.497 | AW339587  | Hs.481927 | Nipped-B homolog (Drosophila)                                                               |
| FUBP1     | 214093_s_at | 0.496 | AA156865  | Hs.567255 | far upstream element (FUSE) binding protein 1                                               |
| HSU79274  | 204521_at   | 0.496 | NM_013300 | Hs.436618 | protein predicted by clone 23733                                                            |

|               |             |       |           |           |                                                                                  |
|---------------|-------------|-------|-----------|-----------|----------------------------------------------------------------------------------|
| PROS1         | 207808_s_at | 0.495 | NM_000313 | Hs.64016  | protein S (alpha)                                                                |
| MAGOH         | 210093_s_at | 0.495 | AF067173  | Hs.421576 | mago-nashi homolog, proliferation-associated (Drosophila)                        |
| FAM20B        | 202916_s_at | 0.495 | NM_014864 | Hs.5737   | family with sequence similarity 20, member B                                     |
| ZF            | 202978_s_at | 0.495 | AW204564  | Hs.535319 | HCF-binding transcription factor Zhangfei                                        |
| C1orf41       | 215691_x_at | 0.494 | AV702994  | Hs.525462 | chromosome 1 open reading frame 41                                               |
| LOC93081      | 213346_at   | 0.494 | BE748563  | Hs.398111 | hypothetical protein BC015148                                                    |
| C9orf40       | 218904_s_at | 0.494 | NM_017998 | Hs.532296 | chromosome 9 open reading frame 40                                               |
| AKAP1         | 210625_s_at | 0.494 | U34074    | Hs.463506 | A kinase (PRKA) anchor protein 1                                                 |
| ARHGEF6       | 209539_at   | 0.493 | D25304    | Hs.522795 | Rac/Cdc42 guanine nucleotide exchange factor (GEF) 6                             |
| C16orf33      | 218493_at   | 0.493 | NM_024571 | Hs.15277  | chromosome 16 open reading frame 33                                              |
| KIAA0960      | 213894_at   | 0.492 | BF447246  | Hs.120855 | KIAA0960 protein                                                                 |
| OPHN1         | 206323_x_at | 0.492 | NM_002547 | Hs.128824 | oligophrenin 1                                                                   |
| TIMP3         | 201149_s_at | 0.491 | U67195    | Hs.297324 | TIMP metalloproteinase inhibitor 3 (Sorsby fundus dystrophy, pseudoinflammatory) |
| NAP1L1        | 204528_s_at | 0.491 | NM_004537 | Hs.524599 | nucleosome assembly protein 1-like 1                                             |
| TSC2          | 215735_s_at | 0.49  | AC005600  | Hs.90303  | tuberous sclerosis 2                                                             |
| TAF4          | 213090_s_at | 0.49  | AI744029  | Hs.473243 | TAF4 RNA polymerase II, TATA box binding protein (TBP)-associated factor, 135kDa |
| LARS          | 217810_x_at | 0.49  | NM_020117 | Hs.432674 | leucyl-tRNA synthetase                                                           |
| RNF170        | 220985_s_at | 0.49  | NM_030954 | Hs.491626 | ring finger protein 170 ; ring finger protein 170                                |
| TTK           | 204822_at   | 0.489 | NM_003318 | Hs.169840 | TTK protein kinase                                                               |
| SYK           | 209269_s_at | 0.489 | AW450910  | Hs.371720 | Spleen tyrosine kinase                                                           |
| SEPT6 ; N-PAC | 212414_s_at | 0.489 | D50918    | Hs.387255 | septin 6 ; cytokine-like nuclear factor n-pac                                    |
| C2orf17       | 221984_s_at | 0.488 | AL040896  | Hs.516707 | chromosome 2 open reading frame 17                                               |
| C19orf2       | 222266_at   | 0.488 | BF796940  | Hs.466391 | Chromosome 19 open reading frame 2                                               |
| TRAPPC6A      | 204985_s_at | 0.488 | NM_024108 | Hs.466929 | trafficking protein particle complex 6A                                          |
| RPL22         | 221726_at   | 0.487 | BE250348  | Hs.515329 | ribosomal protein L22                                                            |
| WDR39         | 217501_at   | 0.487 | AI339732  | Hs.12109  | WD repeat domain 39                                                              |
| TERF1         | 203449_s_at | 0.487 | NM_017489 | Hs.442707 | telomeric repeat binding factor (NIMA-interacting) 1                             |
| TOP2A         | 201291_s_at | 0.487 | AU159942  | Hs.156346 | topoisomerase (DNA) II alpha 170kDa                                              |
| CLGN          | 205830_at   | 0.486 | NM_004362 | Hs.86368  | calmegin                                                                         |
| TTC3          | 208073_x_at | 0.486 | NM_003316 | Hs.368214 | tetratricopeptide repeat domain 3                                                |
| DKC1          | 201478_s_at | 0.485 | U59151    | Hs.4747   | dyskeratosis congenita 1, dyskerin                                               |
| NRGN          | 204081_at   | 0.485 | NM_006176 | Hs.524116 | neurogranin (protein kinase C substrate, RC3)                                    |
| FBXO5         | 218875_s_at | 0.484 | NM_012177 | Hs.520506 | F-box protein 5                                                                  |
| WHSC1         | 209053_s_at | 0.484 | BE793789  | Hs.113876 | Wolf-Hirschhorn syndrome candidate 1                                             |
| ITGB1BP1      | 203336_s_at | 0.484 | AL548363  | Hs.467662 | integrin beta 1 binding protein 1                                                |
| PFAAP5        | 221899_at   | 0.483 | AI809961  | Hs.507680 | Hypothetical gene CG012                                                          |
| C13orf18      | 219471_at   | 0.483 | NM_025113 | Hs.98117  | chromosome 13 open reading frame 18                                              |
| FLI1          | 204236_at   | 0.483 | NM_002017 | Hs.504281 | Friend leukemia virus integration 1                                              |
| MSH6          | 211450_s_at | 0.483 | D89646    | Hs.445052 | mutS homolog 6 (E. coli)                                                         |
| POLR1D        | 218258_at   | 0.482 | NM_015972 |           | polymerase (RNA) I polypeptide D, 16kDa                                          |
| PRSS12        | 205515_at   | 0.482 | NM_003619 | Hs.445857 | protease, serine, 12 (neurotrypsin, motopsin)                                    |
|               | 209478_at   | 0.482 | U95006    |           |                                                                                  |

|              |             |       |           |           |                                                                                        |
|--------------|-------------|-------|-----------|-----------|----------------------------------------------------------------------------------------|
| LOC130074    | 212017_at   | 0.482 | BF677404  | Hs.534679 | hypothetical protein LOC130074                                                         |
| CRI1         | 208669_s_at | 0.481 | AF109873  | Hs.255973 | CREBBP/EP300 inhibitor 1                                                               |
| MGC16943     | 213365_at   | 0.481 | N64622    | Hs.248437 | similar to RIKEN cDNA 4933424N09 gene                                                  |
| ATP2B4       | 212136_at   | 0.481 | AW517686  | Hs.343522 | ATPase, Ca <sup>++</sup> transporting, plasma membrane 4                               |
| DHFR         | 48808_at    | 0.481 | AI144299  | Hs.83765  | dihydrofolate reductase                                                                |
| HMGN4        | 209786_at   | 0.481 | BC001282  | Hs.236774 | high mobility group nucleosomal binding domain 4                                       |
| SFRS1        | 211784_s_at | 0.479 | BC006181  | Hs.68714  | splicing factor, arginine/serine-rich 1 (splicing factor 2, alternate splicing factor) |
| CYP51A1      | 202314_at   | 0.479 | NM_000786 | Hs.417077 | cytochrome P450, family 51, subfamily A, polypeptide 1                                 |
| GBE1         | 203282_at   | 0.478 | NM_000158 | Hs.436062 | glucan (1,4-alpha-), branching enzyme 1                                                |
| HTRA2        | 203089_s_at | 0.477 | NM_013247 | Hs.558479 | HtrA serine peptidase 2                                                                |
| ZNF544       | 218735_s_at | 0.477 | AA349848  | Hs.438994 | zinc finger protein 544                                                                |
| SKP2         | 203625_x_at | 0.477 | BG105365  | Hs.23348  | S-phase kinase-associated protein 2 (p45)                                              |
| FNBP1        | 212288_at   | 0.476 | AB011126  | Hs.189409 | formin binding protein 1                                                               |
| DHFR         | 202532_s_at | 0.475 | BC000192  | Hs.83765  | dihydrofolate reductase                                                                |
| STK39        | 202786_at   | 0.475 | NM_013233 | Hs.276271 | serine threonine kinase 39 (STE20/SPS1 homolog, yeast)                                 |
| ST14         | 216905_s_at | 0.474 | U20428    | Hs.504315 | suppression of tumorigenicity 14 (colon carcinoma, matriptase, epithin)                |
| KIAA0182     | 212057_at   | 0.472 | AA206161  | Hs.461647 | KIAA0182 protein                                                                       |
| RANBP6       | 213019_at   | 0.472 | AI123233  | Hs.167496 | RAN binding protein 6                                                                  |
| GPSM2        | 221922_at   | 0.472 | AW195581  | Hs.489353 | G-protein signalling modulator 2 (AGS3-like, C. elegans)                               |
| OBSL1        | 212775_at   | 0.471 | AI978623  | Hs.526594 | obscurin-like 1                                                                        |
| ACOT7        | 208002_s_at | 0.47  | NM_007274 | Hs.126137 | acyl-CoA thioesterase 7                                                                |
| RAB4A        | 203582_s_at | 0.47  | NM_004578 | Hs.296169 | RAB4A, member RAS oncogene family                                                      |
| TXNDC13      | 201581_at   | 0.47  | BF572868  | Hs.169358 | thioredoxin domain containing 13                                                       |
| ZFR          | 201857_at   | 0.47  | NM_016107 | Hs.435231 | zinc finger RNA binding protein                                                        |
| E2IG5        | 220942_x_at | 0.469 | NM_014367 | Hs.5243   | growth and transformation-dependent protein                                            |
| SFRS14       | 214092_x_at | 0.468 | AI928127  | Hs.515271 | splicing factor, arginine/serine-rich 14                                               |
| HMGN1        | 200943_at   | 0.468 | NM_004965 | Hs.356285 | high-mobility group nucleosome binding domain 1                                        |
| ATP5L        | 208745_at   | 0.468 | AA917672  | Hs.558453 | ATP synthase, H <sup>+</sup> transporting, mitochondrial F0 complex, subunit g         |
| TMSL8        | 205347_s_at | 0.468 | NM_021992 | Hs.56145  | thymosin-like 8                                                                        |
| PYGL         | 202990_at   | 0.468 | NM_002863 | Hs.282417 | phosphorylase, glycogen; liver (Hers disease, glycogen storage disease type VI)        |
| PPM1G        | 200913_at   | 0.467 | NM_002707 | Hs.17883  | protein phosphatase 1G (formerly 2C), magnesium-dependent, gamma isoform               |
| CYB5-M       | 201634_s_at | 0.466 | NM_030579 | Hs.461131 | outer mitochondrial membrane cytochrome b5                                             |
| RPS17        | 216348_at   | 0.466 | AL049693  | Hs.512525 | ribosomal protein S17 ; similar to 40S ribosomal protein S17                           |
| RAD17        | 207405_s_at | 0.466 | NM_002873 | Hs.16184  | RAD17 homolog (S. pombe)                                                               |
| ELA2         | 206871_at   | 0.466 | NM_001972 | Hs.99863  | elastase 2, neutrophil                                                                 |
| FLJ22386     | 218394_at   | 0.465 | NM_024589 | Hs.459795 | leucine zipper domain protein                                                          |
| RAB4A        | 203581_at   | 0.465 | BC002438  | Hs.296169 | RAB4A, member RAS oncogene family                                                      |
| ZNF505       | 208119_s_at | 0.464 | NM_031218 | Hs.301059 | zinc finger protein 505 ; zinc finger protein 505                                      |
| C14orf87     | 221932_s_at | 0.463 | AA133341  | Hs.532683 | chromosome 14 open reading frame 87                                                    |
| C22orf9      | 217118_s_at | 0.463 | AK025608  | Hs.369682 | chromosome 22 open reading frame 9                                                     |
| RBM8A        | 213852_at   | 0.462 | BG289199  | Hs.555911 | RNA binding motif protein 8A                                                           |
| DKFZP564C152 | 216028_at   | 0.462 | AL049980  | Hs.184216 | DKFZP564C152 protein                                                                   |



|              |             |       |           |           |                                                                                        |
|--------------|-------------|-------|-----------|-----------|----------------------------------------------------------------------------------------|
| HSPA4L       | 205543_at   | 0.462 | NM_014278 | Hs.135554 | heat shock 70kDa protein 4-like                                                        |
| GOLGA8A      | 208798_x_at | 0.462 | AF204231  | Hs.182982 | golgi autoantigen, golgin subfamily a, 8A                                              |
| C14orf138    | 218940_at   | 0.462 | NM_024558 | Hs.558541 | chromosome 14 open reading frame 138                                                   |
| RALBP1       | 202845_s_at | 0.461 | NM_006788 | Hs.528993 | ralA binding protein 1                                                                 |
| 6-Mar        | 201737_s_at | 0.461 | NM_005885 | Hs.432862 | membrane-associated ring finger (C3HC4) 6                                              |
| DCPS         | 218774_at   | 0.46  | NM_014026 | Hs.504249 | decapping enzyme, scavenger                                                            |
| RPL35        | 211976_at   | 0.46  | AK026168  | Hs.485155 | Ribosomal protein L35                                                                  |
| SLC35A3      | 206770_s_at | 0.46  | NM_012243 | Hs.448979 | solute carrier family 35 (UDP-N-acetylglucosamine (UDP-GlcNAc) transporter), member A3 |
| TSTA3        | 36936_at    | 0.458 | U58766    | Hs.404119 | tissue specific transplantation antigen P35B                                           |
| C1orf41      | 203960_s_at | 0.458 | NM_016126 | Hs.525462 | chromosome 1 open reading frame 41                                                     |
| CENTG2       | 204066_s_at | 0.458 | NM_014914 | Hs.435039 | centaurin, gamma 2                                                                     |
| LY75         | 205668_at   | 0.457 | NM_002349 | Hs.153563 | lymphocyte antigen 75                                                                  |
| RPL18A       | 216383_at   | 0.457 | U52111    | Hs.558383 | ribosomal protein L18a ; similar to ribosomal protein L18a; 60S ribosomal protein L18a |
| JARID1B      | 201549_x_at | 0.457 | NM_006618 | Hs.443650 | Jumonji, AT rich interactive domain 1B (RBP2-like)                                     |
| NXT2         | 209628_at   | 0.456 | AK023289  | Hs.25010  | nuclear transport factor 2-like export factor 2                                        |
| CKAP2        | 218252_at   | 0.456 | NM_018204 | Hs.444028 | cytoskeleton associated protein 2                                                      |
| EDD1         | 208883_at   | 0.456 | BF515424  | Hs.492445 | E3 ubiquitin protein ligase, HECT domain containing, 1                                 |
| RAB27A       | 209515_s_at | 0.456 | U38654    | Hs.298651 | RAB27A, member RAS oncogene family                                                     |
| MXI1         | 202364_at   | 0.456 | NM_005962 | Hs.501023 | MAX interactor 1 ; MAX interactor 1                                                    |
| UNG          | 202330_s_at | 0.455 | NM_003362 | Hs.191334 | uracil-DNA glycosylase                                                                 |
| PRKACB       | 202742_s_at | 0.455 | NM_002731 | Hs.487325 | protein kinase, cAMP-dependent, catalytic, beta                                        |
| BST1         | 205715_at   | 0.455 | NM_004334 | Hs.169998 | bone marrow stromal cell antigen 1                                                     |
| GCSH         | 213129_s_at | 0.455 | A1970157  | Hs.435741 | glycine cleavage system protein H (aminomethyl carrier)                                |
| FRS1         | 208863_s_at | 0.454 | M72709    | Hs.68714  | splicing factor, arginine/serine-rich 1 (splicing factor 2, alternate splicing factor) |
| PIIG         | 208993_s_at | 0.454 | AW340788  | Hs.470544 | peptidyl-prolyl isomerase G (cyclophilin G)                                            |
| DCXR         | 217973_at   | 0.454 | NM_016286 | Hs.9857   | dicarbonyl/L-xylulose reductase                                                        |
| PTBP2        | 218683_at   | 0.454 | NM_021190 | Hs.269895 | polypyrimidine tract binding protein 2                                                 |
| SPFH1        | 202441_at   | 0.454 | AL568449  | Hs.150087 | SPFH domain family, member 1                                                           |
| PIGB         | 205452_at   | 0.453 | NM_004855 | Hs.126115 | phosphatidylinositol glycan, class B                                                   |
| CROP         | 220044_x_at | 0.453 | NM_016424 | Hs.130293 | cisplatin resistance-associated overexpressed protein                                  |
| UAP1         | 209340_at   | 0.453 | S73498    | Hs.492859 | UDP-N-acetylglucosamine pyrophosphorylase 1                                            |
| WT1          | 206067_s_at | 0.452 | NM_024426 | Hs.555896 | Wilms tumor 1                                                                          |
| CENPF        | 207828_s_at | 0.452 | NM_005196 | Hs.497741 | centromere protein F, 350/400ka (mitosin)                                              |
| GPSM2        | 205240_at   | 0.452 | NM_013296 | Hs.489353 | G-protein signalling modulator 2 (AGS3-like, C. elegans)                               |
| MYB          | 204798_at   | 0.451 | NM_005375 | Hs.531941 | v-myb myeloblastosis viral oncogene homolog (avian)                                    |
| CLEC11A      | 210783_x_at | 0.451 | D86586    | Hs.512680 | C-type lectin domain family 11, member A                                               |
| C13orf10     | 218422_s_at | 0.451 | NM_022118 | Hs.558528 | chromosome 13 open reading frame 10                                                    |
| NPTX1        | 204684_at   | 0.45  | NM_002522 | Hs.514556 | neuronal pentraxin I                                                                   |
| USP7         | 201498_at   | 0.449 | A1160440  | Hs.386939 | Ubiquitin specific peptidase 7 (herpes virus-associated)                               |
| PDCD4        | 202731_at   | 0.449 | NM_014456 | Hs.232543 | programmed cell death 4 (neoplastic transformation inhibitor)                          |
| KTN1 ; PDIA6 | 214709_s_at | 0.449 | Z22551    | Hs.509414 | kinectin 1 (kinesin receptor) ; protein disulfide isomerase family A, member 6         |
| COX11        | 211727_s_at | 0.447 | BC005895  | Hs.96530  | COX11 homolog, cytochrome c oxidase assembly protein (yeast)                           |

|          |             |       |           |           |                                                                                                                            |
|----------|-------------|-------|-----------|-----------|----------------------------------------------------------------------------------------------------------------------------|
| ATP5O    | 216954_x_at | 0.447 | S77356    | Hs.409140 | ATP synthase, H <sup>+</sup> transporting, mitochondrial F1 complex, O subunit (oligomycin sensitivity conferring protein) |
| TFB2M    | 218605_at   | 0.447 | NM_022366 | Hs.7395   | transcription factor B2, mitochondrial                                                                                     |
| ZFR      | 201856_s_at | 0.446 | BC000376  | Hs.435231 | zinc finger RNA binding protein                                                                                            |
| EAF2     | 219551_at   | 0.443 | NM_018456 | Hs.477325 | ELL associated factor 2                                                                                                    |
| PRPF38B  | 218040_at   | 0.442 | NM_018061 | Hs.342307 | PRP38 pre-mRNA processing factor 38 (yeast) domain containing B                                                            |
| CES1     | 209616_s_at | 0.442 | S73751    | Hs.535486 | carboxylesterase 1 (monocyte/macrophage serine esterase 1)                                                                 |
| RNGTT    | 204208_at   | 0.441 | NM_003800 | Hs.127219 | RNA guanylyltransferase and 5'-phosphatase                                                                                 |
|          | 212764_at   | 0.441 | AI806174  |           |                                                                                                                            |
| CCNA1    | 205899_at   | 0.441 | NM_003914 | Hs.417050 | cyclin A1                                                                                                                  |
| AGTPBP1  | 204500_s_at | 0.441 | NM_015239 | Hs.494321 | ATP/GTP binding protein 1                                                                                                  |
| PCGF4    | 202265_at   | 0.441 | NM_005180 | Hs.380403 | polycomb group ring finger 4                                                                                               |
| ECH1     | 200789_at   | 0.44  | NM_001398 | Hs.196176 | enoyl Coenzyme A hydratase 1, peroxisomal                                                                                  |
| SMC5L1   | 212927_at   | 0.44  | AB011166  | Hs.534189 | SMC5 structural maintenance of chromosomes 5-like 1 (yeast)                                                                |
| PKP4     | 201928_at   | 0.438 | AA194254  | Hs.407580 | plakophilin 4                                                                                                              |
| FAH      | 202862_at   | 0.437 | NM_000137 | Hs.73875  | fumarylacetoacetate hydrolase (fumarylacetoacetase)                                                                        |
| HYAL3    | 211728_s_at | 0.437 | BC005896  | Hs.129910 | hyaluronoglucosaminidase 3 ; hyaluronoglucosaminidase 3                                                                    |
| SFPQ     | 214016_s_at | 0.437 | AL558875  | Hs.355934 | Splicing factor proline/glutamine-rich (polypyrimidine tract binding protein associated)                                   |
| RPS27L   | 218007_s_at | 0.437 | NM_015920 | Hs.108957 | ribosomal protein S27-like                                                                                                 |
| UQCRB    | 209066_x_at | 0.436 | M26700    | Hs.131255 | ubiquinol-cytochrome c reductase binding protein                                                                           |
| PNN      | 212036_s_at | 0.435 | AW152664  | Hs.409965 | pinin, desmosome associated protein                                                                                        |
| TIMP3    | 201147_s_at | 0.434 | BF347089  | Hs.297324 | TIMP metalloproteinase inhibitor 3 (Sorsby fundus dystrophy, pseudoinflammatory)                                           |
| TARBP1   | 202813_at   | 0.434 | NM_005646 | Hs.498115 | TAR (HIV) RNA binding protein 1                                                                                            |
| DIPA     | 204610_s_at | 0.434 | NM_006848 | Hs.66713  | hepatitis delta antigen-interacting protein A                                                                              |
| CROP     | 203804_s_at | 0.433 | NM_006107 | Hs.130293 | cisplatin resistance-associated overexpressed protein                                                                      |
| NXF3     | 220110_s_at | 0.433 | NM_022052 | Hs.60386  | nuclear RNA export factor 3                                                                                                |
| GGA2     | 214190_x_at | 0.432 | AI799984  | Hs.460336 | golgi associated, gamma adaptin ear containing, ARF binding protein 2                                                      |
| ZFP36L2  | 201367_s_at | 0.432 | AI356398  | Hs.503093 | zinc finger protein 36, C3H type-like 2                                                                                    |
| PARP8    | 219033_at   | 0.431 | NM_024615 | Hs.369581 | poly (ADP-ribose) polymerase family, member 8                                                                              |
| AKR7A2   | 214259_s_at | 0.43  | AI144075  | Hs.512807 | aldo-keto reductase family 7, member A2 (aflatoxin aldehyde reductase)                                                     |
| KIF23    | 204709_s_at | 0.43  | NM_004856 | Hs.270845 | kinesin family member 23                                                                                                   |
| ANKRD15  | 213005_s_at | 0.43  | D79994    | Hs.493272 | ankyrin repeat domain 15                                                                                                   |
| ZMYND11  | 202136_at   | 0.428 | BE250417  | Hs.292265 | zinc finger, MYND domain containing 11                                                                                     |
| LILRA2   | 211101_x_at | 0.428 | U82276    | Hs.534394 | leukocyte immunoglobulin-like receptor, subfamily A (with TM domain), member 2                                             |
| ACTN1    | 211160_x_at | 0.427 | M95178    | Hs.509765 | actinin, alpha 1                                                                                                           |
| UCHL3    | 204616_at   | 0.427 | NM_006002 | Hs.162241 | ubiquitin carboxyl-terminal esterase L3 (ubiquitin thiolesterase)                                                          |
| EIF4A2   | 200912_s_at | 0.426 | NM_001967 | Hs.478553 | eukaryotic translation initiation factor 4A, isoform 2                                                                     |
| KIAA0746 | 212314_at   | 0.424 | AB018289  | Hs.479384 | KIAA0746 protein                                                                                                           |
| PMS1     | 213677_s_at | 0.423 | BG434893  | Hs.111749 | PMS1 postmeiotic segregation increased 1 (S. cerevisiae)                                                                   |
| SLC7A6   | 203579_s_at | 0.422 | AI660619  |           | solute carrier family 7 (cationic amino acid transporter, y <sup>+</sup> system), member 6                                 |
| NOL8     | 218244_at   | 0.422 | NM_017948 | Hs.442199 | nucleolar protein 8                                                                                                        |
| CLEC11A  | 205131_x_at | 0.421 | NM_002975 | Hs.512680 | C-type lectin domain family 11, member A                                                                                   |
| LAS1L    | 208117_s_at | 0.42  | NM_031206 | Hs.522675 | LAS1-like (S. cerevisiae) ; LAS1-like (S. cerevisiae)                                                                      |

|           |             |       |           |           |                                                                                  |
|-----------|-------------|-------|-----------|-----------|----------------------------------------------------------------------------------|
| AKR7A2    | 202139_at   | 0.42  | NM_003689 | Hs.512807 | aldo-keto reductase family 7, member A2 (aflatoxin aldehyde reductase)           |
| PCM1      | 202174_s_at | 0.42  | NM_006197 | Hs.491148 | pericentriolar material 1                                                        |
| LOC221981 | 214920_at   | 0.419 | R33964    |           | hypothetical protein LOC221981                                                   |
| EIF4B     | 211938_at   | 0.417 | BF247371  | Hs.292063 | eukaryotic translation initiation factor 4B                                      |
| ZNF91     | 206059_at   | 0.417 | NM_003430 | Hs.558418 | zinc finger protein 91 (HPF7, HTF10)                                             |
| TOP2B     | 211987_at   | 0.415 | NM_001068 | Hs.475733 | topoisomerase (DNA) II beta 180kDa                                               |
| ZFP36L2   | 201368_at   | 0.414 | U07802    | Hs.503093 | zinc finger protein 36, C3H type-like 2                                          |
| SLC39A4   | 219215_s_at | 0.413 | NM_017767 | Hs.521934 | solute carrier family 39 (zinc transporter), member 4                            |
| MYCBP     | 203359_s_at | 0.412 | AL525412  | Hs.370040 | c-myc binding protein                                                            |
| HTATSF1   | 202602_s_at | 0.411 | NM_014500 | Hs.204475 | HIV TAT specific factor 1                                                        |
| PRPF31    | 202407_s_at | 0.411 | BF342707  | Hs.515598 | PRP31 pre-mRNA processing factor 31 homolog (yeast)                              |
| NNT       | 202783_at   | 0.411 | U40490    | Hs.482043 | nicotinamide nucleotide transhydrogenase                                         |
| CBFA2T3   | 208056_s_at | 0.41  | NM_005187 | Hs.513811 | core-binding factor, runt domain, alpha subunit 2; translocated to, 3            |
| BXDC2     | 219177_at   | 0.409 | NM_018321 | Hs.38114  | brix domain containing 2                                                         |
| HOMER3    | 215489_x_at | 0.408 | A1871287  | Hs.410683 | homer homolog 3 (Drosophila)                                                     |
| TAF9      | 202168_at   | 0.408 | NM_003187 | Hs.248941 | TAF9 RNA polymerase II, TATA box binding protein (TBP)-associated factor, 32kDa  |
| SERTAD2   | 202657_s_at | 0.406 | NM_014755 | Hs.77293  | SERTA domain containing 2                                                        |
| TRGC2     | 211144_x_at | 0.405 | M30894    |           | T cell receptor gamma constant 2                                                 |
| SMYD3     | 218788_s_at | 0.404 | NM_022743 | Hs.127406 | SET and MYND domain containing 3                                                 |
| RCN2      | 201486_at   | 0.404 | NM_002902 | Hs.79088  | reticulocalbin 2, EF-hand calcium binding domain                                 |
| PDLIM2    | 219165_at   | 0.404 | NM_021630 | Hs.555972 | PDZ and LIM domain 2 (mystique)                                                  |
| PKP4      | 201929_s_at | 0.404 | NM_003628 | Hs.407580 | plakophilin 4                                                                    |
| TTC3      | 208662_s_at | 0.402 | A1885338  | Hs.368214 | tetratricopeptide repeat domain 3                                                |
| FLJ10287  | 219130_at   | 0.398 | NM_019083 | Hs.440371 | hypothetical protein FLJ10287                                                    |
| C2orf17   | 222129_at   | 0.398 | AK026155  | Hs.516707 | Chromosome 2 open reading frame 17                                               |
| MASK      | 218499_at   | 0.398 | NM_016542 | Hs.444247 | Mst3 and SOK1-related kinase                                                     |
| C6orf111  | 212179_at   | 0.396 | AW157501  | Hs.520287 | chromosome 6 open reading frame 111                                              |
| AFF1      | 201924_at   | 0.395 | NM_005935 | Hs.480190 | AF4/FMR2 family, member 1                                                        |
| CGI-116   | 218628_at   | 0.394 | NM_016053 | Hs.405692 | CGI-116 protein                                                                  |
| PTPRF     | 200637_s_at | 0.394 | A1762627  | Hs.272062 | protein tyrosine phosphatase, receptor type, F                                   |
| ABCD3     | 202850_at   | 0.394 | NM_002858 | Hs.76781  | ATP-binding cassette, sub-family D (ALD), member 3                               |
| ALCAM     | 201951_at   | 0.393 | BF242905  | Hs.150693 | activated leukocyte cell adhesion molecule                                       |
| TCFL5     | 204849_at   | 0.392 | NM_006602 | Hs.30696  | transcription factor-like 5 (basic helix-loop-helix)                             |
| PRTN3     | 207341_at   | 0.392 | NM_002777 | Hs.928    | proteinase 3 (serine proteinase, neutrophil, Wegener granulomatosis autoantigen) |
| E2F8      | 219990_at   | 0.391 | NM_024680 | Hs.523526 | E2F transcription factor 8                                                       |
|           | 212498_at   | 0.391 | AF056433  | Hs.561432 | Full-length cDNA clone CS0DM001YA04 of Fetal liver of Homo sapiens (human)       |
| SLC35A1   | 203306_s_at | 0.391 | NM_006416 | Hs.423163 | solute carrier family 35 (CMP-sialic acid transporter), member A1                |
| RGC32     | 218723_s_at | 0.391 | NM_014059 | Hs.507866 | response gene to complement 32                                                   |
| MICAL1    | 218376_s_at | 0.389 | NM_022765 | Hs.33476  | microtubule associated monooxygenase, calponin and LIM domain containing 1       |
| STMN1     | 200783_s_at | 0.389 | NM_005563 | Hs.209983 | stathmin 1/oncoprotein 18                                                        |
| HNRPA3    | 211929_at   | 0.388 | AA527502  | Hs.516539 | heterogeneous nuclear ribonucleoprotein A3                                       |
| FUBP1     | 212847_at   | 0.382 | AL036840  | Hs.567255 | Far upstream element (FUSE) binding protein 1                                    |

|               |             |       |           |           |                                                                                                           |
|---------------|-------------|-------|-----------|-----------|-----------------------------------------------------------------------------------------------------------|
| CRIP1         | 205081_at   | 0.382 | NM_001311 | Hs.70327  | cysteine-rich protein 1 (intestinal)                                                                      |
| HOMER3        | 204647_at   | 0.379 | NM_004838 | Hs.410683 | homer homolog 3 (Drosophila)                                                                              |
| MRPL33        | 203781_at   | 0.377 | NM_004891 | Hs.515879 | mitochondrial ribosomal protein L33                                                                       |
| RET           | 215771_x_at | 0.376 | X15786    | Hs.350321 | ret proto-oncogene (multiple endocrine neoplasia and medullary thyroid carcinoma 1, Hirschsprung disease) |
| TIMP3         | 201150_s_at | 0.376 | NM_000362 | Hs.297324 | TIMP metallopeptidase inhibitor 3 (Sorsby fundus dystrophy, pseudoinflammatory)                           |
| CD302         | 203799_at   | 0.374 | NM_014880 | Hs.130014 | CD302 antigen                                                                                             |
| DKFZp434N2030 | 213701_at   | 0.373 | AW299245  | Hs.494204 | hypothetical protein DKFZp434N2030                                                                        |
| HNRPA0        | 201054_at   | 0.372 | BE966599  | Hs.96996  | heterogeneous nuclear ribonucleoprotein A0                                                                |
| SACS          | 213262_at   | 0.371 | AI932370  | Hs.159492 | spastic ataxia of Charlevoix-Saguenay (sacsin)                                                            |
| PLAC8         | 219014_at   | 0.371 | NM_016619 | Hs.546392 | placenta-specific 8                                                                                       |
| CETN2         | 209194_at   | 0.369 | BC005334  | Hs.82794  | centrin, EF-hand protein, 2                                                                               |
| ZFP36L2       | 201369_s_at | 0.369 | NM_006887 | Hs.503093 | zinc finger protein 36, C3H type-like 2                                                                   |
| PGRMC2        | 213227_at   | 0.368 | BE879873  | Hs.507910 | progesterone receptor membrane component 2                                                                |
| NKTR          | 215338_s_at | 0.368 | AI688640  | Hs.529509 | natural killer-tumor recognition sequence                                                                 |
| NDUFA5        | 201304_at   | 0.367 | NM_005000 | Hs.83916  | NADH dehydrogenase (ubiquinone) 1 alpha subcomplex, 5, 13kDa                                              |
| TMEM38B       | 218772_x_at | 0.366 | NM_018112 | Hs.411925 | transmembrane protein 38B                                                                                 |
| SPHAR         | 206272_at   | 0.365 | NM_006542 | Hs.511754 | S-phase response (cyclin-related)                                                                         |
| SAS10         | 209486_at   | 0.364 | BC004546  | Hs.322901 | disrupter of silencing 10                                                                                 |
| IMPA2         | 203126_at   | 0.364 | NM_014214 | Hs.367992 | inositol(myo)-1(or 4)-monophosphatase 2                                                                   |
| C5            | 205500_at   | 0.36  | NM_001735 | Hs.494997 | complement component 5                                                                                    |
| CD37          | 204192_at   | 0.358 | NM_001774 | Hs.166556 | CD37 antigen                                                                                              |
| GATM          | 203178_at   | 0.357 | NM_001482 | Hs.75335  | glycine amidinotransferase (L-arginine:glycine amidinotransferase)                                        |
| IRF8          | 204057_at   | 0.355 | AI073984  | Hs.137427 | interferon regulatory factor 8 ; interferon regulatory factor 8                                           |
| PKP4          | 201927_s_at | 0.354 | BG292559  | Hs.407580 | plakophilin 4                                                                                             |
| EIF2C2        | 222294_s_at | 0.353 | AW971415  | Hs.449415 | Eukaryotic translation initiation factor 2C, 2                                                            |
| TRGC2         | 215806_x_at | 0.35  | M13231    | Hs.534032 | T cell receptor gamma constant 2 ; T cell receptor gamma variable 9                                       |
| SGK3          | 220038_at   | 0.345 | NM_013257 | Hs.380877 | serum/glucocorticoid regulated kinase family, member 3                                                    |
| P2RY2         | 206277_at   | 0.344 | NM_002564 | Hs.339    | purinergic receptor P2Y, G-protein coupled, 2                                                             |
|               | 211600_at   | 0.344 | U20489    |           |                                                                                                           |
| H2AFV         | 212205_at   | 0.338 | AA534860  | Hs.488189 | H2A histone family, member V                                                                              |
| BRP44         | 202427_s_at | 0.337 | NM_015415 | Hs.517768 | brain protein 44                                                                                          |
| BCL2          | 203685_at   | 0.336 | NM_000633 | Hs.150749 | B-cell CLL/lymphoma 2                                                                                     |
| C22orf9       | 212421_at   | 0.336 | AB023147  | Hs.369682 | chromosome 22 open reading frame 9                                                                        |
| FLJ20054      | 219696_at   | 0.335 | NM_019049 | Hs.518926 | hypothetical protein FLJ20054                                                                             |
| KBTBD11       | 204301_at   | 0.334 | NM_014867 | Hs.5333   | kelch repeat and BTB (POZ) domain containing 11                                                           |
| RBL2          | 212331_at   | 0.333 | X76061    | Hs.513609 | retinoblastoma-like 2 (p130)                                                                              |
| ALCAM         | 201952_at   | 0.331 | AA156721  | Hs.150693 | activated leukocyte cell adhesion molecule                                                                |
| C13orf18      | 44790_s_at  | 0.328 | AI129310  | Hs.98117  | chromosome 13 open reading frame 18                                                                       |
| BEX1          | 218332_at   | 0.327 | NM_018476 | Hs.334370 | brain expressed, X-linked 1                                                                               |
| ARL1          | 201657_at   | 0.326 | BE890745  | Hs.372616 | ADP-ribosylation factor-like 1                                                                            |
| TRGC2         | 209813_x_at | 0.315 | M16768    | Hs.534032 | T cell receptor gamma constant 2 ; T cell receptor gamma constant 2 ; T cell receptor gamma variable 9    |
| LOC283768     | 213737_x_at | 0.315 | AI620911  | Hs.146211 | hypothetical LOC283768 ; similar to hypothetical protein ; similar to hypothetical protein                |

|           |             |       |           |           |                                                                                                           |
|-----------|-------------|-------|-----------|-----------|-----------------------------------------------------------------------------------------------------------|
| TUBA1     | 212242_at   | 0.313 | AL565074  | Hs.75318  | tubulin, alpha 1 (testis specific)                                                                        |
| HT008     | 218099_at   | 0.309 | NM_018469 | Hs.175414 | uncharacterized hypothalamus protein HT008                                                                |
| CAT       | 201432_at   | 0.308 | NM_001752 | Hs.502302 | catalase                                                                                                  |
| TTC3      | 210645_s_at | 0.3   | D83077    | Hs.368214 | tetratricopeptide repeat domain 3                                                                         |
| C20orf103 | 219463_at   | 0.3   | NM_012261 | Hs.22920  | chromosome 20 open reading frame 103                                                                      |
| DHRS9     | 219799_s_at | 0.296 | NM_005771 | Hs.179608 | dehydrogenase/reductase (SDR family) member 9                                                             |
| RNASET2   | 217984_at   | 0.295 | NM_003730 | Hs.529989 | ribonuclease T2                                                                                           |
| LILRA2    | 211102_s_at | 0.293 | U82277    | Hs.534394 | leukocyte immunoglobulin-like receptor, subfamily A (with TM domain), member 2                            |
| ATP1B1    | 201242_s_at | 0.289 | BC000006  | Hs.291196 | ATPase, Na <sup>+</sup> /K <sup>+</sup> transporting, beta 1 polypeptide                                  |
| PTPRF     | 200636_s_at | 0.282 | NM_002840 | Hs.272062 | protein tyrosine phosphatase, receptor type, F                                                            |
| LILRA2    | 207857_at   | 0.264 | NM_006866 | Hs.534394 | leukocyte immunoglobulin-like receptor, subfamily A (with TM domain), member 2                            |
| MEST      | 202016_at   | 0.25  | NM_002402 | Hs.270978 | mesoderm specific transcript homolog (mouse)                                                              |
| WRB       | 202749_at   | 0.248 | NM_004627 | Hs.198308 | tryptophan rich basic protein                                                                             |
| RASGRP2   | 214369_s_at | 0.243 | AI688812  | Hs.99491  | RAS guanyl releasing protein 2 (calcium and DAG-regulated)                                                |
| CAT       | 211922_s_at | 0.24  | AY028632  | Hs.502302 | catalase ; catalase                                                                                       |
| GM632     | 55872_at    | 0.235 | AI493119  | Hs.551552 | KIAA1196 protein                                                                                          |
| PDCD4     | 212593_s_at | 0.234 | N92498    | Hs.232543 | programmed cell death 4 (neoplastic transformation inhibitor)                                             |
| NUCB2     | 203675_at   | 0.233 | NM_005013 | Hs.128686 | nucleobindin 2                                                                                            |
| RET       | 211421_s_at | 0.228 | M31213    | Hs.350321 | Ret proto-oncogene (multiple endocrine neoplasia and medullary thyroid carcinoma 1, Hirschsprung disease) |
| CTSG      | 205653_at   | 0.216 | NM_001911 | Hs.421724 | cathepsin G                                                                                               |
| MS4A6A    | 219666_at   | 0.201 | NM_022349 | Hs.523702 | membrane-spanning 4-domains, subfamily A, member 6A                                                       |
| C11orf32  | 212560_at   | 0.15  | AV728268  |           | chromosome 11 open reading frame 32                                                                       |
